# Supplementary material for: Trinuclear and tetranuclear cyclopentadienyl vanadium carbonyl clusters: unusual carbonyl groups in Herrmann's (C5H5)4V4(CO)4 exhibiting low CO stretching frequencies
Source: Royal Society of Chemistry journal article supplement (doi:10.1039/c4nj01505c), 2015-01-01
Supplement: c4nj01505c1.pdf [file c4nj01505c1.pdf]

# Trinuclear and tetranuclear cyclopentadienyl vanadium carbonyl clusters: unusual carbonyl groups in Herrmann's mysterious $(C_5H_5)_4V_4(CO)_4$ exhibiting low CO stretching frequencies

Lu Li <sup>a,b</sup>, Shida Gong<sup>a,c</sup>, Xiuhui Zhang<sup>\*a,b</sup>, Qian-shu Li<sup>b,c</sup> and R. Bruce King<sup>\*c,d</sup>

<sup>a</sup> Key Laboratory of Cluster Science, Ministry of Education of China, School of Chemistry, Beijing Institute of Technology, Beijing 100081, P. R. China

<sup>b</sup> State Key Laboratory of Explosion Science and Technology, Beijing Institute of Technology, Beijing 100081, PR China

<sup>c</sup> MOE Key Laboratory of Theoretical Chemistry of Environment, Center for Computational Quantum Chemistry, South China Normal University, Guangzhou 510006, PR China

<sup>d</sup> Department of Chemistry and Center for Computational Chemistry, University of Georgia, Athens, Georgia 30606, USA

## Supporting Information

**Table S1:** The values of V-V bond (Å) for  $Cp_2V_2(CO)_5$ .

**Table S2:** The  $\nu(CO)$  vibrational frequencies ( $cm^{-1}$ ) for  $Cp_2V_2(CO)_5$ .

**Tables S3 to S5:** Total energies (E, in hartree) and relative energies ( $\Delta E$ , in kcal/mol) for **4T-1**, **4T-4** and **4Q-3** of  $Cp_4V_4(CO)_4$ .

**Tables S6 to S8:** Total energies (E, in hartree), relative energies ( $\Delta E$ , in kcal/mol), spin square values  $\langle S^2 \rangle$ , number of imaginary vibrational frequencies (Nimg) for the five singlet, three triplet and two quintet structures of  $Cp_4V_4(CO)_4$ .

**Table S9:** Infrared active  $\nu(CO)$  vibrational frequencies ( $cm^{-1}$ ) predicted for the ten lowest energy stationary points of  $Cp_4V_4(CO)_4$  using the PBE method.

**Table S10:** Total energies (E, in hartree), relative energies ( $\Delta E$ , in kcal/mol), number of imaginary vibrational frequencies (Nimg) for the three singlet structures of  $Cp_3V_3(CO)_9$ .

**Table S11:** Infrared active  $\nu(CO)$  vibrational frequencies ( $cm^{-1}$ ) predicted for the three singlet stationary points of  $Cp_3V_3(CO)_9$  using the PBE method.

**Tables S12 to S14:** Total energies (E, in hartree), relative energies ( $\Delta E$ , in kcal/mol), spin square values  $\langle S^2 \rangle$ , number of imaginary vibrational frequencies (Nimg) at BP86/TZP level of the theory for the five singlet, three triplet and two quintet structures of  $Cp_4V_4(CO)_4$ .

**Table S15:** Total energies ( $E$ , in hartree), relative energies ( $\Delta E$ , in kcal/mol), number of imaginary vibrational frequencies ( $N_{\text{img}}$ ) at BP86/TZP level of the theory for the three singlet structures of  $\text{Cp}_3\text{V}_3(\text{CO})_9$ .

**Table S16:** Total energies ( $E$ , in hartree), relative energies ( $\Delta E$ , in kcal/mol), spin square values ( $\langle S^2 \rangle$ ), number of imaginary vibrational frequencies ( $N_{\text{img}}$ ) at PBE0/DZP level of the theory for the lowest energy structure and one quintet structure of  $\text{Cp}_4\text{V}_4(\text{CO})_4$ .

**Table S17:** Total energies ( $E$ , in hartree) and number of imaginary vibrational frequencies ( $N_{\text{img}}$ ) at BP86/DZP and PBE/DZP levels of the theory for the stationary points of  $\text{Cp}_2\text{V}_2(\text{CO})_n$  ( $n = 6, 5, 4, 3, 2, 1$ ).

**Figure S1:** Optimized structures for **4T-4** and **4Q-3** of  $\text{Cp}_4\text{V}_4(\text{CO})_4$  by BP86 and PBE methods.

**Figures S2 to S4:** Optimized structures for the five singlet, three triplet and two quintet structures of  $\text{Cp}_4\text{V}_4(\text{CO})_4$  by BP86 and PBE methods.

**Figure S5:** Optimized structures for the three singlet structures of  $\text{Cp}_3\text{V}_3(\text{CO})_9$  by BP86 and PBE methods.

**Figures S6 to S14:** The comments and molecular orbital diagrams related to the V-V  $\pi$ -bonding orbitals (a) and V-V  $\sigma$ -bonding orbitals (b) for the five singlet, two triplet and two quintet structures of  $\text{Cp}_4\text{V}_4(\text{CO})_4$ .

**Figure S15:** The comments and molecular orbital diagrams related to the V-V  $\sigma$ -bonding orbitals for the lowest energy structure of  $\text{Cp}_3\text{V}_3(\text{CO})_9$ .

**Tables S18 to S29:** Theoretical cartesian coordinates (in Å) for the five singlet, four triplet and three quintet structures of  $\text{Cp}_4\text{V}_4(\text{CO})_4$  using the BP86 method.

**Tables S30 to S32:** Theoretical cartesian coordinates (in Å) for the three singlet structures of  $\text{Cp}_3\text{V}_3(\text{CO})_9$  using the BP86 method.

**Tables S33 to S35:** The theoretical harmonic vibrational frequencies for the twelve structures of  $\text{Cp}_4\text{V}_4(\text{CO})_4$  using the BP86 method.

**Table S36:** The theoretical harmonic vibrational frequencies for the three structures of  $\text{Cp}_3\text{V}_3(\text{CO})_9$  using the BP86 method.

Complete Gaussian 09 reference (Reference 19)

**Table S1.** The values of V-V bond (Å) for  $\text{Cp}_2\text{V}_2(\text{CO})_5$ .

|             | V-V (Å) |
|-------------|---------|
| <b>BP86</b> | 2.452   |
| <b>PBE</b>  | 2.447   |
| Exp.[7]     | 2.459   |

**Table S2.** The  $\nu(\text{CO})$  vibrational frequencies ( $\text{cm}^{-1}$ ) for  $\text{Cp}_2\text{V}_2(\text{CO})_5$ .

|             | $\nu(\text{CO})(\text{cm}^{-1})$ |
|-------------|----------------------------------|
| <b>BP86</b> | 1836,1865,1891,1926,1966         |
| <b>PBE</b>  | 1846,1875,1900,1935,1976         |
| Exp.[7]     | 1817,1858,1890,1944,1990         |

**Table S3.** Total energies (E, in hartree), relative energies ( $\Delta E$ , in kcal/mol) at the BP86/DZP and PBE/DZP levels of the theory for **4T-1**, **4T-4** and **4Q-3** of  $\text{Cp}_4\text{V}_4(\text{CO})_4$ .

|             |            | <b>4T-1(<math>C_1</math>)</b> | <b>4T-4(<math>C_1</math>)</b> | <b>4Q-3(<math>C_2</math>)</b> |
|-------------|------------|-------------------------------|-------------------------------|-------------------------------|
| <b>BP86</b> | E          | -5004.565892                  | -5004.351694                  | -5004.339048                  |
|             | $\Delta E$ | 0                             | 134.4                         | 142.3                         |
| <b>PBE</b>  | E          | -5001.665012                  | -5001.452130                  | -5001.439427                  |
|             | $\Delta E$ | 0                             | 133.6                         | 141.6                         |

**Table S4.** Total energies (E, in hartree), relative energies ( $\Delta E$ , in kcal/mol) at the BP86/ 6-311+ G(2d,2p) and PBE/6-311+ G(2d,2p) levels of the theory for **4T-1**, **4T-4** and **4Q-3** of  $\text{Cp}_4\text{V}_4(\text{CO})_4$ .

|             |            | <b>4T-1(<math>C_1</math>)</b> | <b>4T-4(<math>C_1</math>)</b> | <b>4Q-3(<math>C_2</math>)</b> |
|-------------|------------|-------------------------------|-------------------------------|-------------------------------|
| <b>BP86</b> | E          | -5004.660285                  | -5004.440550                  | -5004.428948                  |
|             | $\Delta E$ | 0                             | 137.9                         | 145.2                         |
| <b>PBE</b>  | E          | -5001.755946                  | -5001.536529                  | -5001.524838                  |
|             | $\Delta E$ | 0                             | 137.7                         | 145.0                         |

**Table S5.** Total energies (E, in hartree), relative energies ( $\Delta E$ , in kcal/mol) with the Grimme's dispersion corrections (IOP (3/124=3)) at BP86/DZP and PBE/DZP levels of the theory for **4T-1**, **4T-4** and **4Q-3** of  $\text{Cp}_4\text{V}_4(\text{CO})_4$ .

|             |            | <b>4T-1(<math>C_1</math>)</b> | <b>4T-4(<math>C_1</math>)</b> | <b>4Q-3(<math>C_2</math>)</b> |
|-------------|------------|-------------------------------|-------------------------------|-------------------------------|
| <b>BP86</b> | E          | -5004.689729                  | -5004.513805                  | -5004.500926                  |
|             | $\Delta E$ | 0                             | 110.4                         | 118.5                         |
| <b>PBE</b>  | E          | -5001.753646                  | -5001.568092                  | -5001.555354                  |
|             | $\Delta E$ | 0                             | 116.4                         | 124.4                         |

**Table S6.** Total energies (E, in hartree), relative energies ( $\Delta E$ , in kcal/mol), spin square values  $\langle S^2 \rangle$ , number of imaginary vibrational frequencies (Nimg) for the singlet stationary points of  $\text{Cp}_4\text{V}_4(\text{CO})_4$ .

| <b>Singlet</b> |                       | <b>4S-1(<math>S_4</math>)</b> | <b>4S-2(<math>C_1</math>)</b> | <b>4S-3(<math>C_1</math>)</b> | <b>4S-4(<math>D_{2d}</math>)</b> | <b>4S-5(<math>C_2</math>)</b> |
|----------------|-----------------------|-------------------------------|-------------------------------|-------------------------------|----------------------------------|-------------------------------|
| <b>BP86</b>    | E                     | -5004.564269                  | -5004.553768                  | -5004.551280                  | -5004.544045                     | -5004.542863                  |
|                | $\Delta E$            | 1.0                           | 7.6                           | 9.2                           | 13.7                             | 14.5                          |
|                | $\langle S^2 \rangle$ | 0.0                           | 0.0                           | 0.0                           | 0.0                              | 0.0                           |
|                | Nimg                  | 0                             | 0                             | 0                             | 0                                | 0                             |
| <b>PBE</b>     | E                     | -5001.664066                  | -5001.654313                  | -5001.650915                  | -5001.644531                     | -5001.643272                  |
|                | $\Delta E$            | 0.6                           | 6.7                           | 8.8                           | 12.9                             | 13.6                          |
|                | $\langle S^2 \rangle$ | 0.0                           | 0.0                           | 0.0                           | 0.0                              | 0.0                           |
|                | Nimg                  | 0                             | 0                             | 0                             | 0                                | 0                             |

**Table S7.** Total Energies (E, in hartree), relative energies ( $\Delta E$ , in kcal/mol), spin square values  $\langle S^2 \rangle$ , number of imaginary vibrational frequencies (Nimg) for the triplet stationary points of  $\text{Cp}_4\text{V}_4(\text{CO})_4$ .

| <b>Triplet</b> |                       | <b>4T-1(<math>C_1</math>)</b> | <b>4T-2(<math>C_1</math>)</b> | <b>4T-3(<math>C_2</math>)</b> |
|----------------|-----------------------|-------------------------------|-------------------------------|-------------------------------|
| <b>BP86</b>    | E                     | -5004.565892                  | -5004.548402                  | -5004.545326                  |
|                | $\Delta E$            | 0                             | 11.0                          | 12.9                          |
|                | $\langle S^2 \rangle$ | 2.12                          | 2.05                          | 2.05                          |
|                | Nimg                  | 0                             | 0                             | 0                             |
| <b>PBE</b>     | E                     | -5001.665012                  | -5001.648298                  | -5001.644947                  |
|                | $\Delta E$            | 0                             | 10.5                          | 12.6                          |
|                | $\langle S^2 \rangle$ | 2.12                          | 2.05                          | 2.06                          |
|                | Nimg                  | 0                             | 0                             | 0                             |

**Table S8.** Total energies (E, in hartree), relative energies ( $\Delta E$ , in kcal/mol), spin square values  $\langle S^2 \rangle$ , number of imaginary vibrational frequencies (Nimg) for the quintet stationary points of  $\text{Cp}_4\text{V}_4(\text{CO})_4$

| Quintet     |                       | 4Q-1( $C_1$ ) | 4Q-2( $C_1$ ) |
|-------------|-----------------------|---------------|---------------|
| <b>BP86</b> | E                     | -5004.557093  | -5004.544384  |
|             | $\Delta E$            | 5.5           | 13.5          |
|             | $\langle S^2 \rangle$ | 6.09          | 6.07          |
|             | Nimg                  | 0             | 0             |
| <b>PBE</b>  | E                     | -5001.647534  | -5001.644291  |
|             | $\Delta E$            | 11.0          | 13.0          |
|             | $\langle S^2 \rangle$ | 6.20          | 6.08          |
|             | Nimg                  | 0             | 0             |

**Table S9.** Infrared active  $\nu(\text{CO})$  vibrational frequencies ( $\text{cm}^{-1}$ ) predicted for the ten lowest energy stationary points of  $\text{Cp}_4\text{V}_4(\text{CO})_4$  (infrared intensities in parentheses are in  $\text{km}/\text{mol}$ ).

| PBE              |                                            |
|------------------|--------------------------------------------|
| 4S-1( $S_4$ )    | 1551(23), 1553(263), 1553(263), 1559(0)    |
| 4S-2( $C_1$ )    | 1330(65), 1722(292), 1752(770), 1787(506)  |
| 4S-3( $C_1$ )    | 1678(610), 1694(211), 1713(439), 1725(271) |
| 4S-4( $D_{2d}$ ) | 1629(669), 1629(669), 1642(211), 1658(0)   |
| 4S-5( $C_2$ )    | 1626(668), 1626(660), 1639(219), 1655(0)   |
| 4T-1( $C_1$ )    | 1382(50), 1532(189), 1634(345), 1667(323)  |
| 4T-2( $C_1$ )    | 1315(55), 1741(425), 1759(628), 1814(561)  |
| 4T-3( $C_2$ )    | 1529(294), 1529(26), 1540(339), 1569(17)   |
| 4Q-1( $C_1$ )    | 1476(117), 1503(226), 1657(373), 1672(243) |
| 4Q-2( $C_1$ )    | 1646(372), 1667(344), 1694(649), 1707(134) |

**Table S10.** Total energies (E, in hartree), relative energies ( $\Delta E$ , in kcal/mol), number of imaginary vibrational frequencies (Nimg) for the three singlet stationary points of  $\text{Cp}_3\text{V}_3(\text{CO})_9$ .

|             |            | 9S-1( $C_3$ ) | 9S-2( $C_1$ ) | 9S-3( $C_s$ ) |
|-------------|------------|---------------|---------------|---------------|
| <b>BP86</b> | E          | -4433.578680  | -4433.568298  | -4433.553551  |
|             | $\Delta E$ | 0             | 6.5           | 15.8          |
|             | Nimg       | 0             | 0             | 0             |
| <b>PBE</b>  | E          | -4430.676327  | -4430.665704  | -4430.651992  |
|             | $\Delta E$ | 0             | 6.7           | 15.3          |
|             | Nimg       | 0             | 0             | 0             |

**Table S11.** Infrared active  $\nu(\text{CO})$  vibrational frequencies ( $\text{cm}^{-1}$ ) predicted for the three singlet stationary points of  $\text{Cp}_3\text{V}_3(\text{CO})_9$  (infrared intensities in parentheses are in  $\text{km}/\text{mol}$ ).

|                               |  | PBE                                                                                                |
|-------------------------------|--|----------------------------------------------------------------------------------------------------|
| <b>9S-1(<math>C_3</math>)</b> |  | 1840(40), 1840(40), 1880(1013), 1904(633), 1904(633), 1915(260), 1932(430), 1932(430), 1993(880)   |
| <b>9S-2(<math>C_1</math>)</b> |  | 1765(324), 1793(147), 1874(305), 1901(563), 1912(33), 1922(142), 1944(616), 1961(1464), 1999(641)  |
| <b>9S-3(<math>C_s</math>)</b> |  | 1723(337), 1804(251), 1868(410), 1870(314), 1879(140), 1930(17), 1949(1408), 1950(438), 1993(1356) |

**Table S12.** Total energies (E, in hartree), relative energies ( $\Delta E$ , in kcal/mol), spin square values  $\langle S^2 \rangle$ , number of imaginary vibrational frequencies (Nimg) at BP86/TZP level of the theory for the singlet stationary points of  $\text{Cp}_4\text{V}_4(\text{CO})_4$ .

|             |                       | 4S-1( $S_4$ ) | 4S-2( $C_1$ ) | 4S-3( $C_1$ ) | 4S-4( $D_{2d}$ )            | 4S-5( $C_2$ ) |
|-------------|-----------------------|---------------|---------------|---------------|-----------------------------|---------------|
| <b>BP86</b> | E                     | -5004.838821  | -5004.832983  | -5004.832489  | -5004.821611                | -5004.820511  |
|             | $\Delta E$            | 2.0           | 5.7           | 6.0           | 12.8                        | 13.5          |
|             | $\langle S^2 \rangle$ | 0.0           | 0.0           | 0.0           | 0.0                         | 0.0           |
|             | Nimg                  | 0             | 0             | 0             | 3(11i,7i,7i) <sup>[a]</sup> | 0             |

<sup>[a]</sup>These imaginary frequencies were reduced to 0i by using the larger (120,974) integration.

**Table S13.** Total energies (E, in hartree), relative energies ( $\Delta E$ , in kcal/mol), spin square values  $\langle S^2 \rangle$ , number of imaginary vibrational frequencies (Nimg) at BP86/TZP level of the theory for the triplet stationary points of  $\text{Cp}_4\text{V}_4(\text{CO})_4$ .

|             |                       | <b>4T-1(C<sub>1</sub>)</b> | <b>4T-2(C<sub>1</sub>)</b> | <b>4T-3(C<sub>2</sub>)</b> |
|-------------|-----------------------|----------------------------|----------------------------|----------------------------|
| <b>BP86</b> | <b>E</b>              | -5004.842002               | -5004.827879               | -5004.819127               |
|             | $\Delta E$            | 0                          | 8.9                        | 14.4                       |
|             | $\langle S^2 \rangle$ | 2.1                        | 2.1                        | 2.1                        |
|             | Nimg                  | 0                          | 0                          | 0                          |

**Table S14.** Total energies (E, in hartree), relative energies ( $\Delta E$ , in kcal/mol), spin square values  $\langle S^2 \rangle$ , number of imaginary vibrational frequencies (Nimg) at BP86/TZP level of the theory for the quintet stationary points of  $\text{Cp}_4\text{V}_4(\text{CO})_4$ .

|             |                       | <b>4Q-1(C<sub>1</sub>)</b> | <b>4Q-2(C<sub>2</sub>)</b> |
|-------------|-----------------------|----------------------------|----------------------------|
| <b>BP86</b> | <b>E</b>              | -5004.831936               | -5004.823626               |
|             | $\Delta E$            | 6.3                        | 11.5                       |
|             | $\langle S^2 \rangle$ | 6.1                        | 6.0                        |
|             | Nimg                  | 0                          | 0                          |

**Table S15.** Total energies (E, in hartree), relative energies ( $\Delta E$ , in kcal/mol), number of imaginary vibrational frequencies (Nimg) at BP86/TZP level of the theory for the singlet stationary points of  $\text{Cp}_3\text{V}_3(\text{CO})_9$ .

|             |            | <b>9S-1(C<sub>3</sub>)</b> | <b>9S-2(C<sub>1</sub>)</b> | <b>9S-3(C<sub>3</sub>)</b> |
|-------------|------------|----------------------------|----------------------------|----------------------------|
| <b>BP86</b> | <b>E</b>   | -4433.929323               | -4433.917701               | -4433.901157               |
|             | $\Delta E$ | 0                          | 7.3                        | 17.7                       |
|             | Nimg       | 0                          | 0                          | 0                          |

**Table S16.** Total energies (E, in hartree), relative energies ( $\Delta E$ , in kcal/mol), spin square values  $\langle S^2 \rangle$ , number of imaginary vibrational frequencies (Nimg) at PBE0/DZP level of the theory for the lowest energy structure and one quintet stationary point of  $\text{Cp}_4\text{V}_4(\text{CO})_4$ .

|             |                       | 4T-1( $C_1$ ) | 4Q-1( $C_1$ ) |
|-------------|-----------------------|---------------|---------------|
| <b>PBE0</b> | E                     | -5001.657687  | -5001.652138  |
|             | $\Delta E$            | 0             | 3.5           |
|             | $\langle S^2 \rangle$ | 3.5           | 7.3           |
|             | Nimg                  | 0             | 0             |

**Table S17.** Total energies (E, in hartree), number of imaginary vibrational frequencies (Nimg) at BP86/DZP and PBE/DZP levels of the theory for the stationary points of  $\text{Cp}_2\text{V}_2(\text{CO})_n$  (n=6, 5, 4, 3, 2, 1).

|      |      | $\text{Cp}_2\text{V}_2(\text{CO})_6(C_{2v})$ | $\text{Cp}_2\text{V}_2(\text{CO})_5(C_s)$ | $\text{Cp}_2\text{V}_2(\text{CO})_4(C_s)$ |
|------|------|----------------------------------------------|-------------------------------------------|-------------------------------------------|
| BP86 | E    | -2955.732464                                 | -2842.387986                              | -2729.007233                              |
|      | Nimg | 0                                            | 0                                         | 0                                         |
| PBE  | E    | -2953.793219                                 | -2840.569460                              | -2727.309052                              |
|      | Nimg | 0                                            | 0                                         | 0                                         |
|      |      | $\text{Cp}_2\text{V}_2(\text{CO})_3(C_s)$    | $\text{Cp}_2\text{V}_2(\text{CO})_2(C_s)$ | $\text{Cp}_2\text{V}_2(\text{CO})(C_s)$   |
| BP86 | E    | -2615.630904                                 | -2502.223405                              | -2388.804308                              |
|      | Nimg | 0                                            | 1(16i) <sup>[a]</sup>                     | 1(3i)                                     |
| PBE  | E    | -2614.054169                                 | -2500.767570                              | -2387.470156                              |
|      | Nimg | 0                                            | 1(13i) <sup>[a]</sup>                     | 1(7i)                                     |

<sup>[a]</sup>These imaginary frequencies were reduced to 0i by using the larger (120,974) integration.



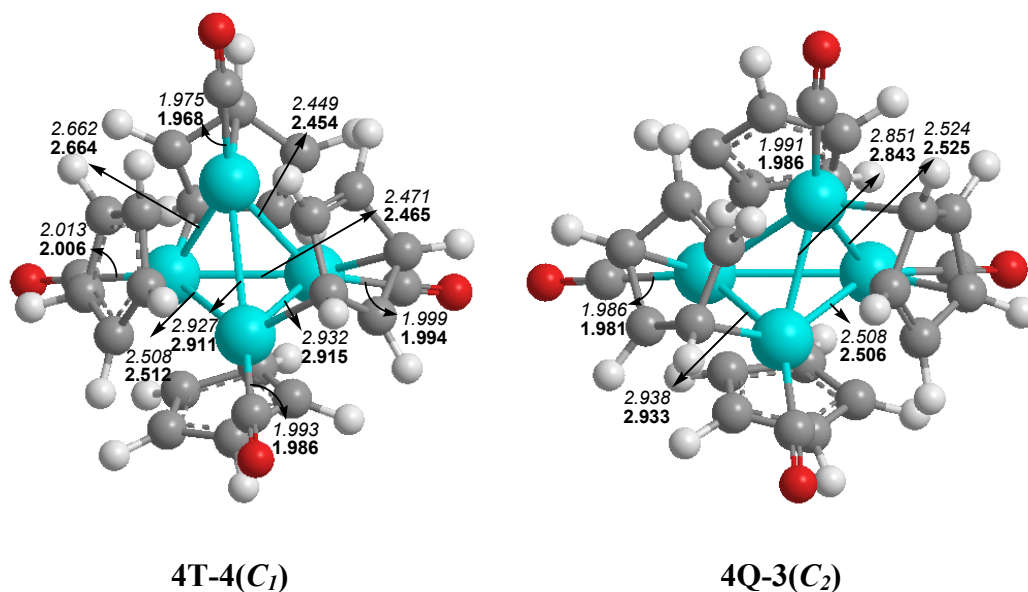

**Figure S1.** The optimized structures for  $Cp_4V_4(CO)_4$  by BP86 and PBE methods. The upper numbers (*italics*) were obtained by the BP86 method, while the lower numbers (**bold face**) were obtained by the PBE method. The data in all of the other figures in the present paper have the same arrangement. In all of the structure figures blue circles (●) represent vanadium atoms; red circles (●) represent oxygen atoms; and gray circles (●) represent carbon atoms.

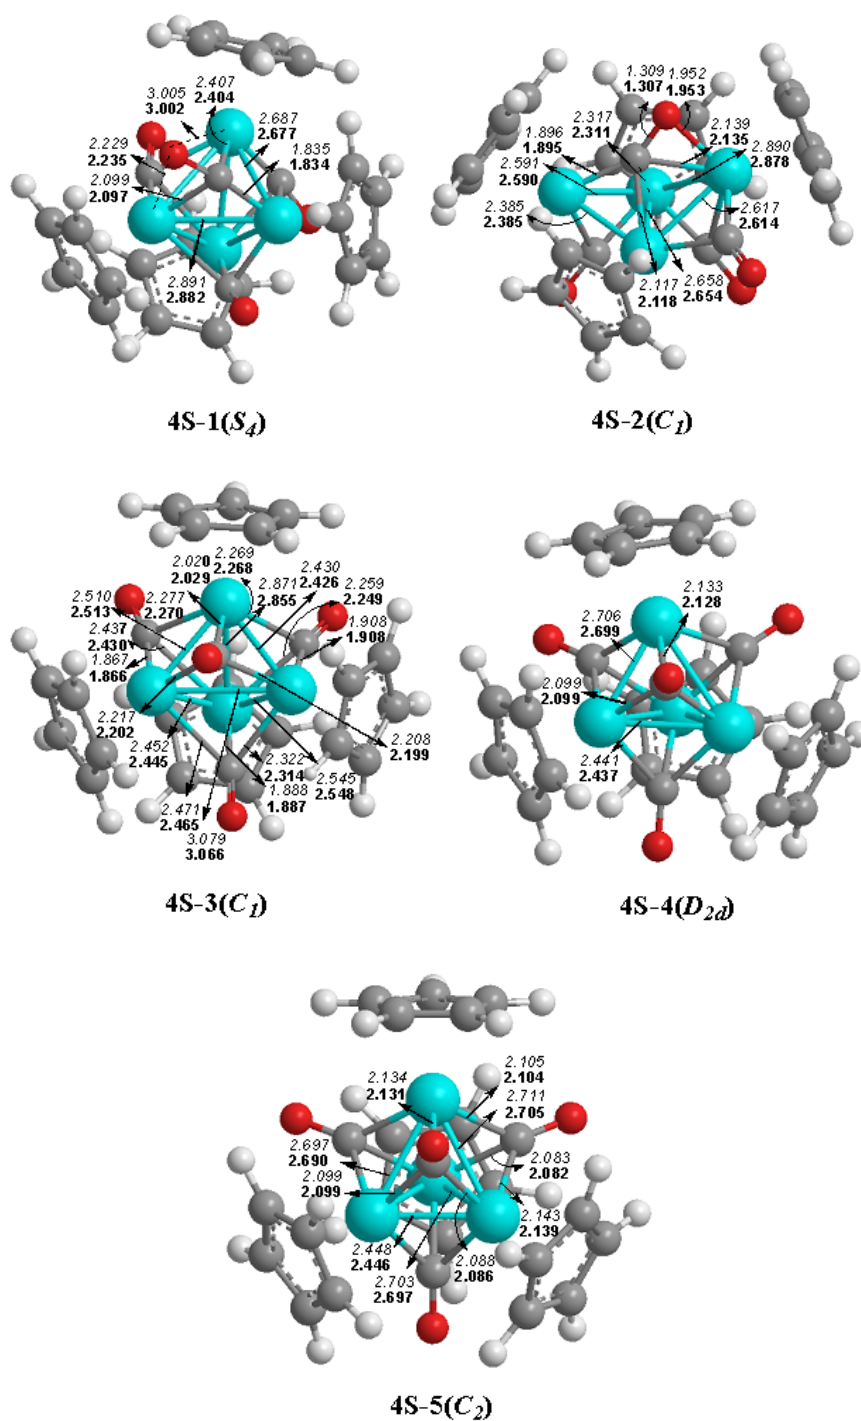

**Figure S2.** The five optimized singlet structures for  $\text{Cp}_4\text{V}_4(\text{CO})_4$  by BP86 and PBE methods.

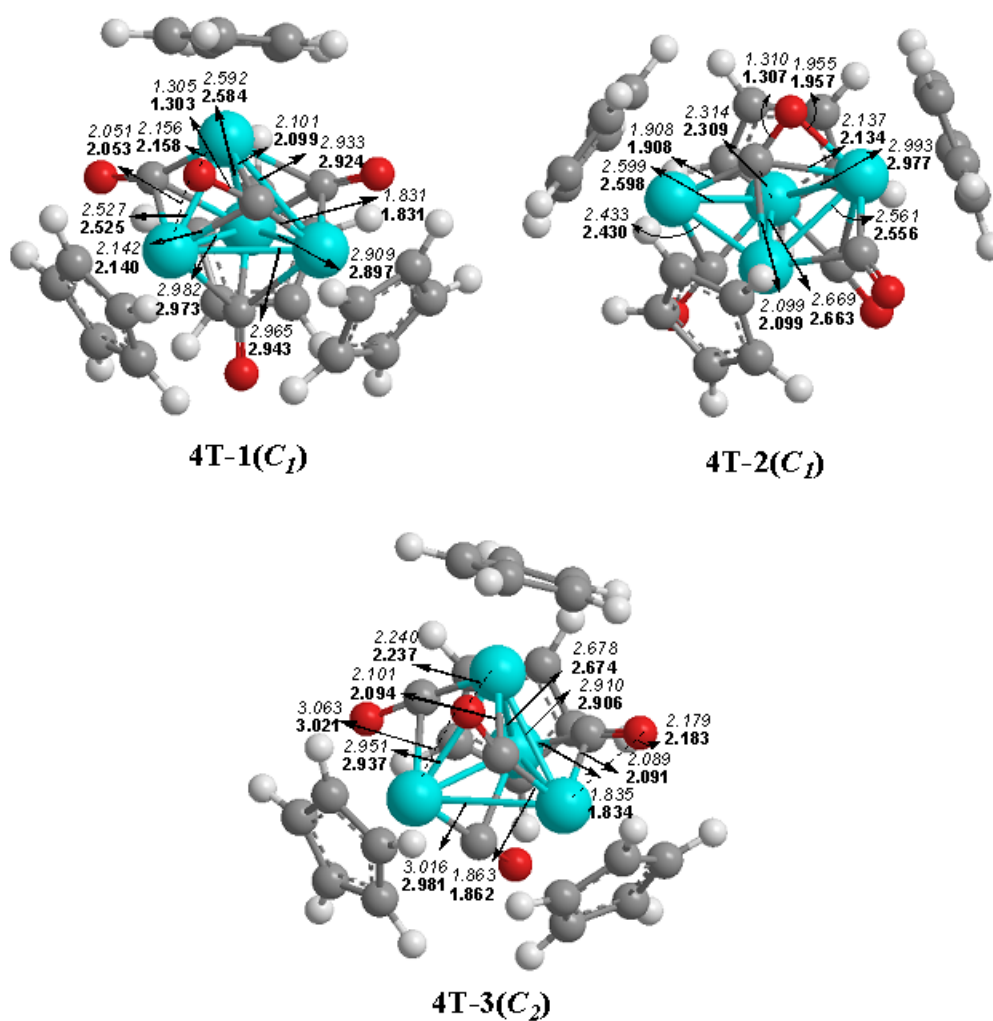

**Figure S3.** The three optimized triplet structures for  $\text{Cp}_4\text{V}_4(\text{CO})_4$  by BP86 and PBE methods.

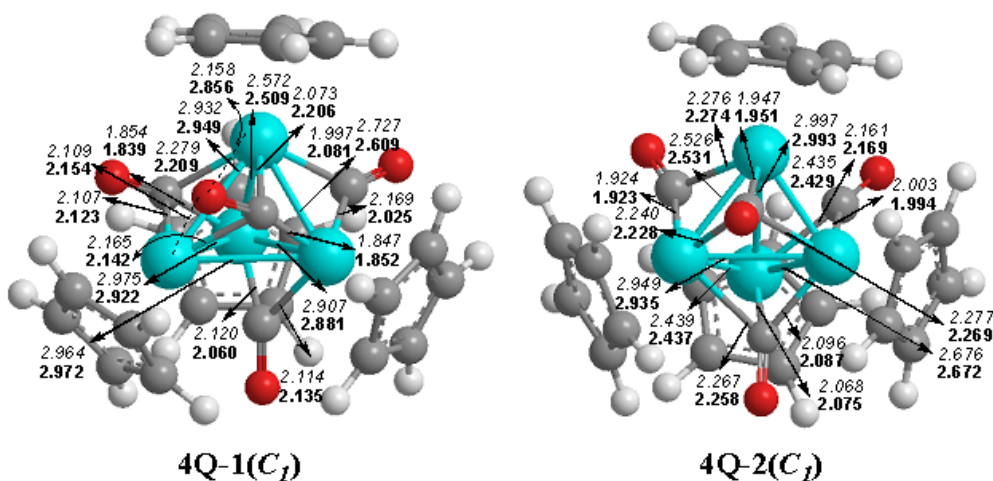

**Figure S4.** The two optimized quintet structures for  $\text{Cp}_4\text{V}_4(\text{CO})_4$  by BP86 and PBE methods.

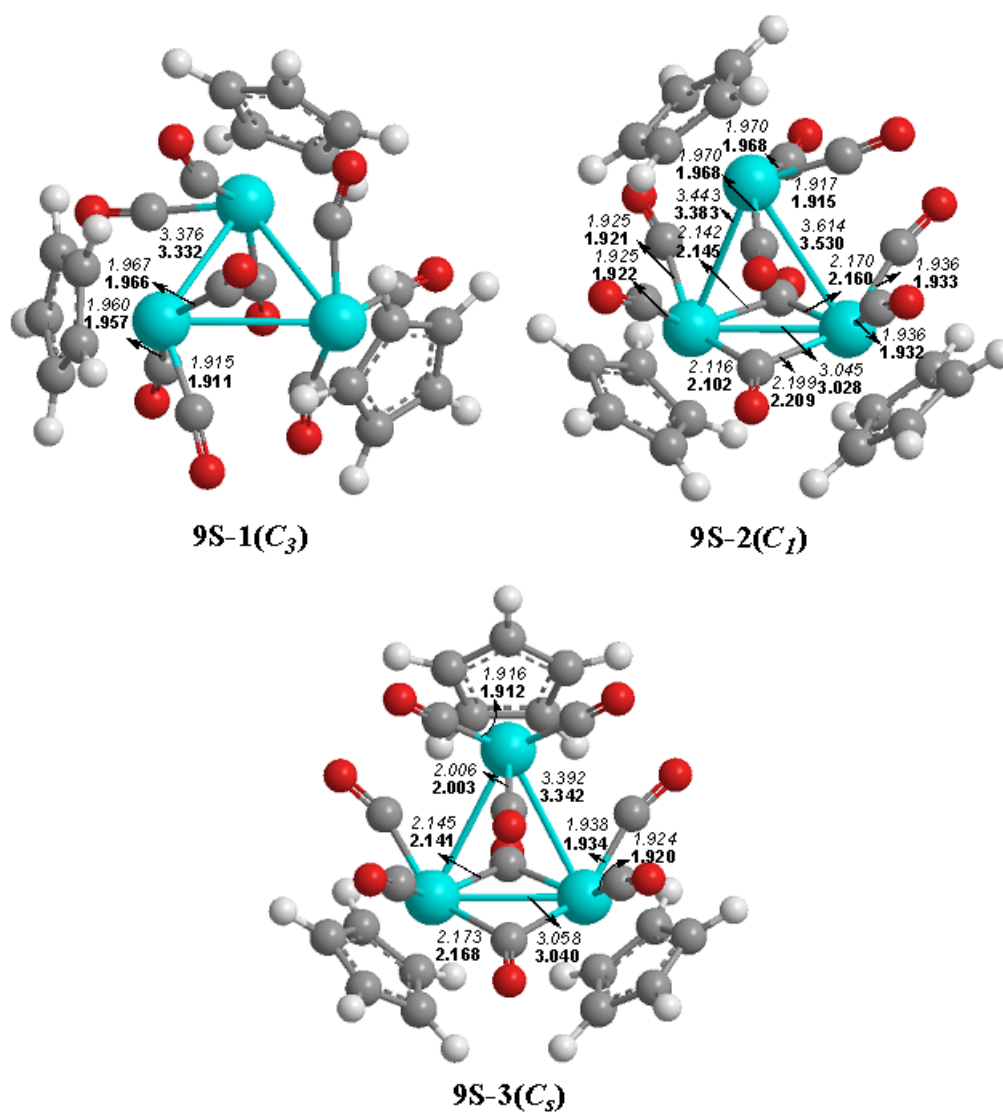

**Figure S5.** The three optimized singlet structures for  $Cp_3V_3(CO)_9$  by BP86 and PBE methods.

**4S-1** has two short V-V double bonds, namely, 2.687 Å for V<sub>1</sub>-V<sub>2</sub> and V<sub>3</sub>-V<sub>4</sub>. The other four V-V single bonds are relatively longer, namely, 2.891 Å for V<sub>1</sub>-V<sub>3</sub>, V<sub>1</sub>-V<sub>4</sub>, V<sub>2</sub>-V<sub>3</sub> and V<sub>2</sub>-V<sub>4</sub> bonds. This leads to give 16-electron configuration for each vanadium atom. The molecular orbital diagrams of **4S-1** are shown in Figure S6. The HOMO-2 and HOMO-7 orbitals can be assigned to the π-bonding orbital and σ-bonding orbital of V<sub>1</sub>-V<sub>2</sub> double bond, respectively. HOMO-1 and HOMO-5 orbitals can be regarded as π-bonding orbital and σ-bonding orbital of V<sub>3</sub>-V<sub>4</sub> double bond, respectively. The HOMO, HOMO-6, HOMO-4 and HOMO-3 orbitals are consistent with the σ-bonding orbitals of V<sub>1</sub>-V<sub>3</sub>, V<sub>1</sub>-V<sub>4</sub>, V<sub>2</sub>-V<sub>3</sub> and V<sub>2</sub>-V<sub>4</sub> single bonds, respectively.

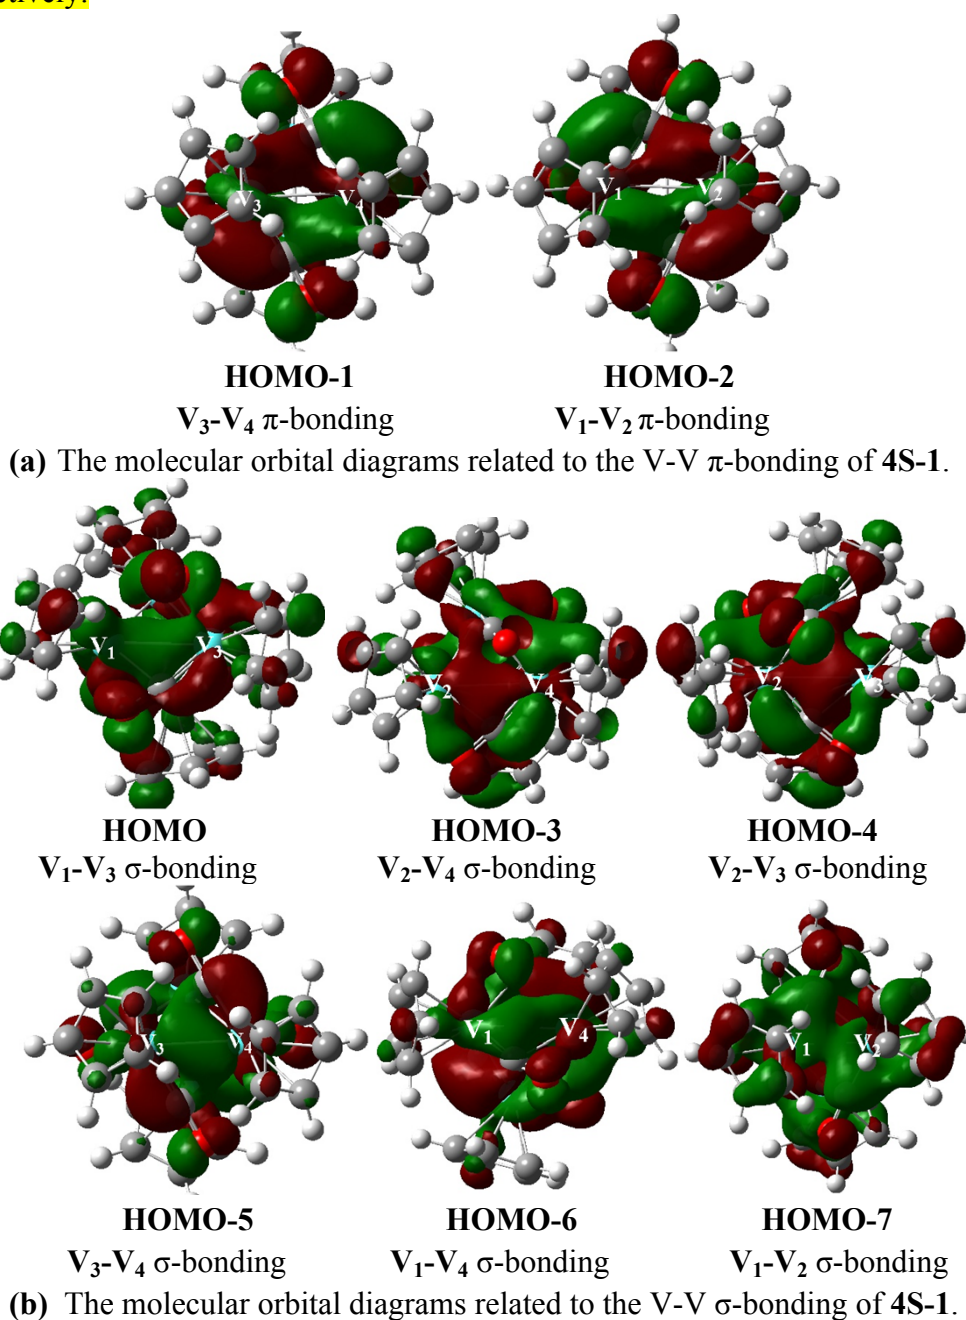

**Figure S6.** The comments and molecular orbital diagrams related to the V-V π-bonding orbitals (a) and V-V σ-bonding orbitals (b) of **4S-1**.

**4S-2** has one short V-V triple bond, i.e. 2.385 Å for V<sub>1</sub>-V<sub>3</sub>. The other three V-V double bonds are relatively longer, namely, 2.617 Å for V<sub>1</sub>-V<sub>2</sub> bond, 2.591 Å for V<sub>3</sub>-V<sub>4</sub> bond and 2.658 Å for V<sub>1</sub>-V<sub>4</sub> bond. The distance for the last V<sub>2</sub>-V<sub>4</sub> single bond is 2.890 Å. The distance for V<sub>2</sub>⋯V<sub>3</sub> is 3.845 Å, indicating there was only a slight bonding interaction between these two vanadium atoms. The four-electron donor η<sup>2</sup>-μ<sub>4</sub>-CO group in **4S-2** accommodates the electron deficiency of this structure, thus to give 18-electron configurations for three vanadium atoms and 16-electron configuration for one vanadium atom. The molecular orbital diagrams of **4S-2** are shown in Figure S7. The HOMO, HOMO-2 and HOMO-6 orbitals are consistent with two π-bonding orbitals and σ-bonding orbital of V<sub>1</sub>-V<sub>3</sub> triple bond, respectively. The HOMO-1 and HOMO-14 orbitals are corresponding to π-bonding orbital and σ-bonding orbital of V<sub>1</sub>-V<sub>2</sub> double bond, respectively. The HOMO-5 and HOMO-3 orbitals can be regarded as π-bonding orbital and σ-bonding orbital of V<sub>3</sub>-V<sub>4</sub> double bond, respectively. The HOMO-4 and HOMO-15 orbitals can be assigned as π-bonding orbital and σ-bonding orbital of V<sub>1</sub>-V<sub>4</sub> double bond, respectively. The HOMO-7 orbital is corresponding to σ-bonding orbital of V<sub>2</sub>-V<sub>4</sub> single bond.

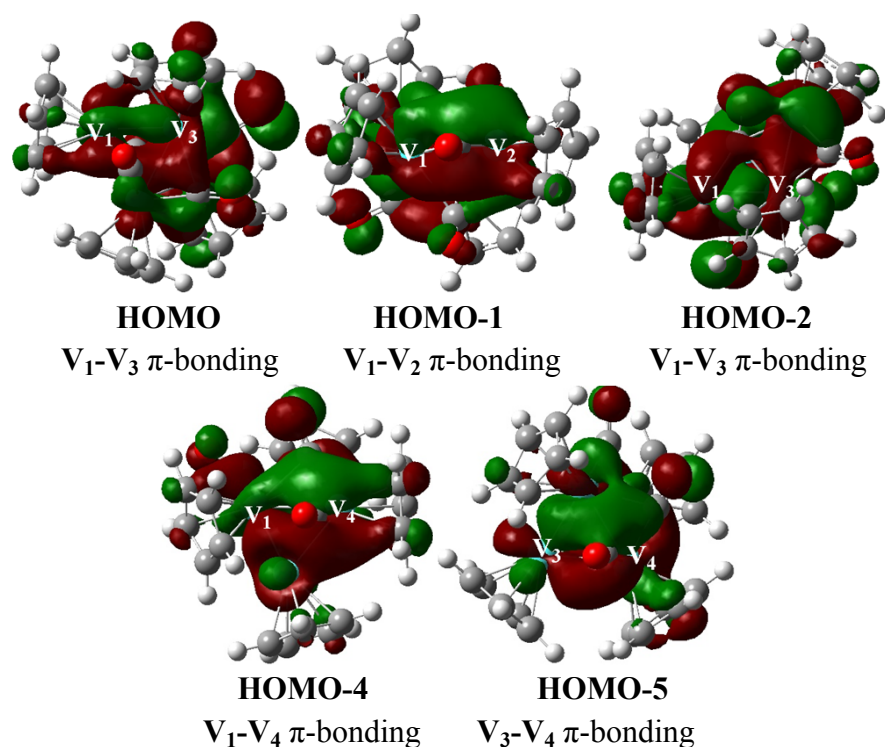

(a) The molecular orbital diagrams related to the V-V π-bonding of **4S-2**.

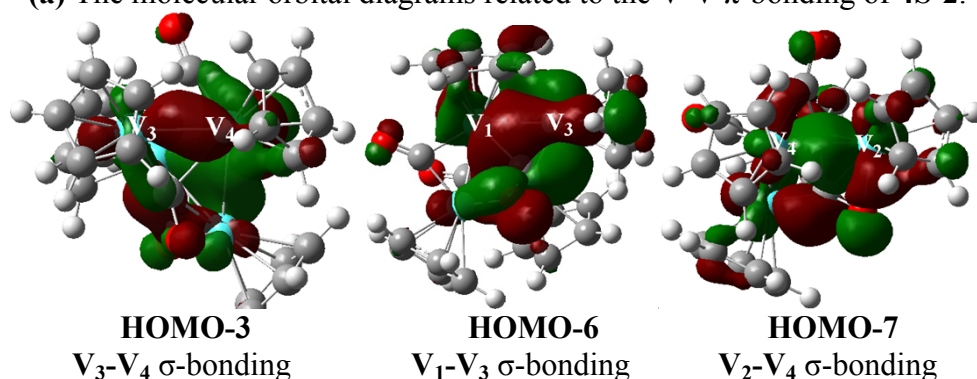

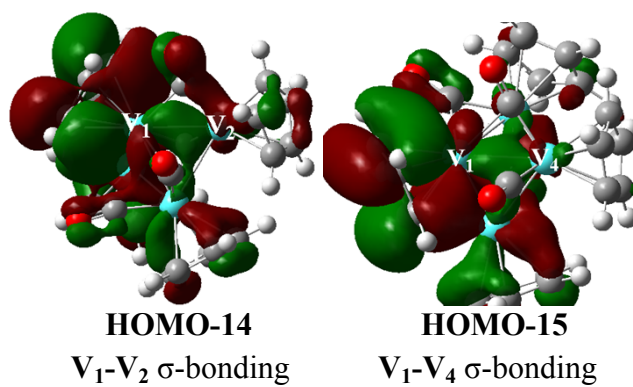

(b) The molecular orbital diagrams related to the V-V  $\sigma$ -bonding of 4S-2.

**Figure S7.** The comments and molecular orbital diagrams related to the V-V  $\pi$ -bonding orbitals (a) and V-V  $\sigma$ -bonding orbitals (b) of 4S-2.

**4S-3** has two short V-V triple bonds, namely, 2.452 Å for V<sub>1</sub>-V<sub>4</sub> and 2.430 Å for V<sub>2</sub>-V<sub>3</sub>. The distances for the relatively longer V<sub>1</sub>-V<sub>2</sub> and V<sub>3</sub>-V<sub>4</sub> double bonds are 2.545 and 2.510 Å. The last two V-V single bonds, namely, V<sub>1</sub>-V<sub>3</sub> and V<sub>2</sub>-V<sub>4</sub> have distances of 2.871 and 3.079 Å, respectively. This leads to the favored 18-electron configuration for each vanadium atom. The molecular orbital diagrams of **4S-3** are shown in Figure S8. The HOMO-6, HOMO-13 and HOMO-4 orbitals are corresponding to two π-bonding orbitals and σ-bonding orbital of V<sub>1</sub>-V<sub>4</sub> triple bonds, respectively. The HOMO-10, HOMO-15 and HOMO orbitals are consistent with two π-bonding orbitals and σ-bonding orbital of V<sub>2</sub>-V<sub>3</sub> triple bond, respectively. The HOMO-2 and HOMO-12 orbitals are corresponding to π-bonding orbital and σ-bonding orbital of V<sub>1</sub>-V<sub>2</sub> double bond, respectively. The HOMO-5 and HOMO-1 orbitals can be regarded as π-bonding orbital and σ-bonding orbital of V<sub>3</sub>-V<sub>4</sub> double bond, respectively. The HOMO-3 and HOMO-7 orbitals can be assigned as σ-bonding orbitals of V<sub>1</sub>-V<sub>3</sub> and V<sub>2</sub>-V<sub>4</sub> single bonds, respectively.

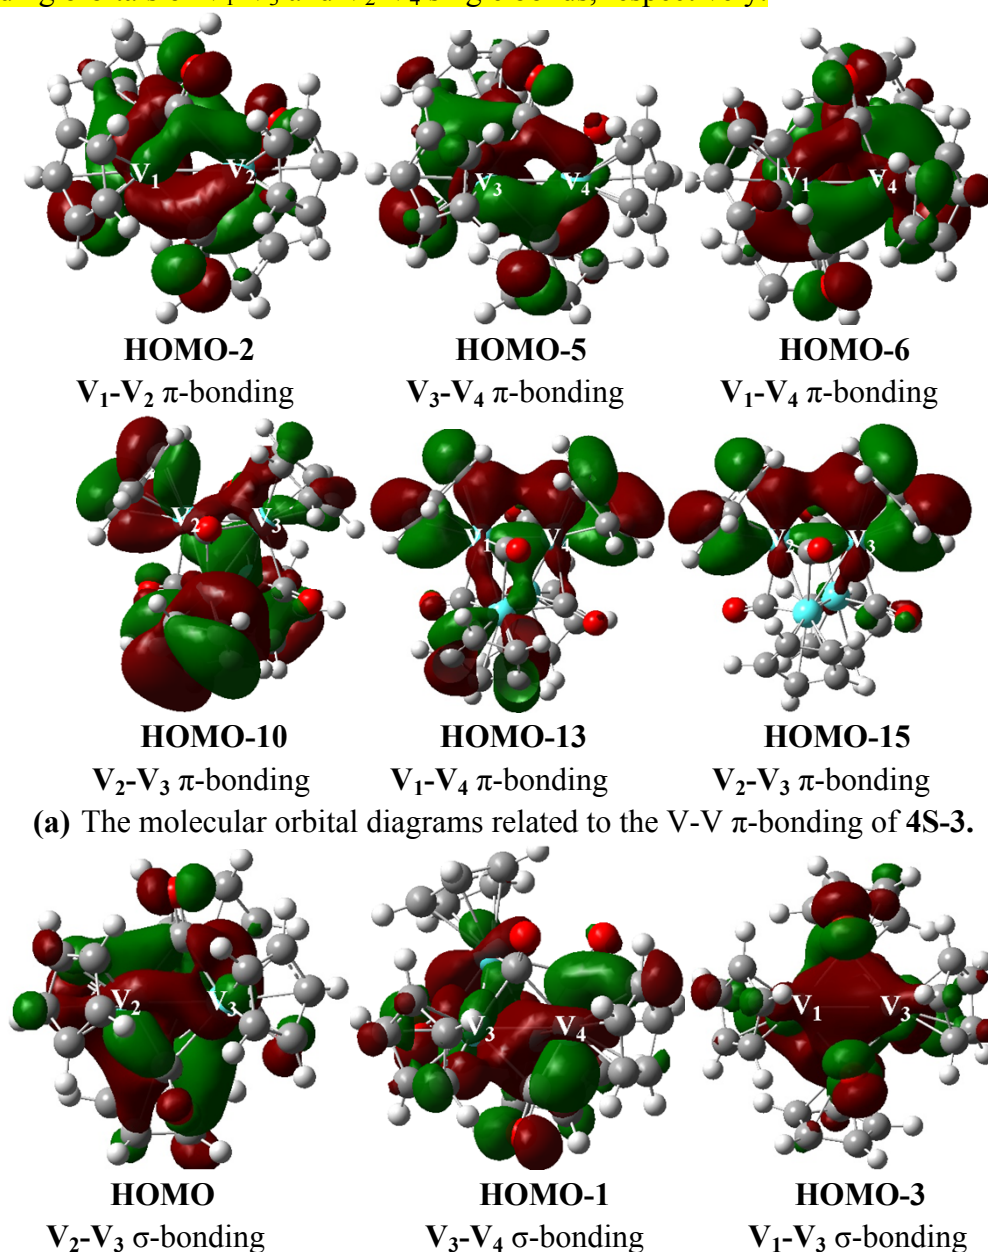



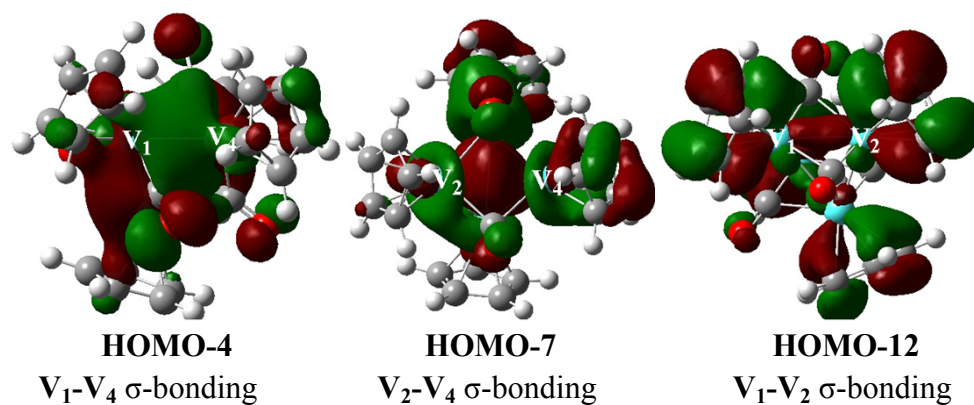

(b) The molecular orbital diagrams related to the V-V  $\sigma$ -bonding of 4S-3.

**Figure S8.** The comments and molecular orbital diagrams related to the V-V  $\pi$ -bonding orbitals (a) and V-V  $\sigma$ -bonding orbitals (b) of 4S-3.

**4S-4** has two short V-V triple bonds, namely, 2.441 Å for V<sub>1</sub>-V<sub>2</sub> and V<sub>3</sub>-V<sub>4</sub>. The other four long V-V single bonds are relatively longer, i.e. 2.706 Å for V<sub>1</sub>-V<sub>3</sub>, V<sub>1</sub>-V<sub>4</sub>, V<sub>2</sub>-V<sub>3</sub> and V<sub>2</sub>-V<sub>4</sub> bonds. This leads to 18-electron configurations for two vanadium atoms and 16-electron configuration for another two vanadium atoms. The molecular orbital diagrams of **4S-4** are shown in Figure S9. The HOMO-1, HOMO-4 and HOMO-14 orbitals can be regarded as two π-bonding orbitals and σ-bonding orbital of V<sub>1</sub>-V<sub>2</sub> triple bond, respectively. The HOMO, HOMO-7 and HOMO-6 orbitals are corresponding to two π-bonding orbitals and σ-bonding orbital of V<sub>3</sub>-V<sub>4</sub> triple bond, respectively. The HOMO-11, HOMO-5, HOMO-3 and HOMO-2 orbitals can be considered as σ-bonding orbitals of V<sub>1</sub>-V<sub>3</sub>, V<sub>1</sub>-V<sub>4</sub>, V<sub>2</sub>-V<sub>3</sub> and V<sub>2</sub>-V<sub>4</sub> single bonds, respectively.

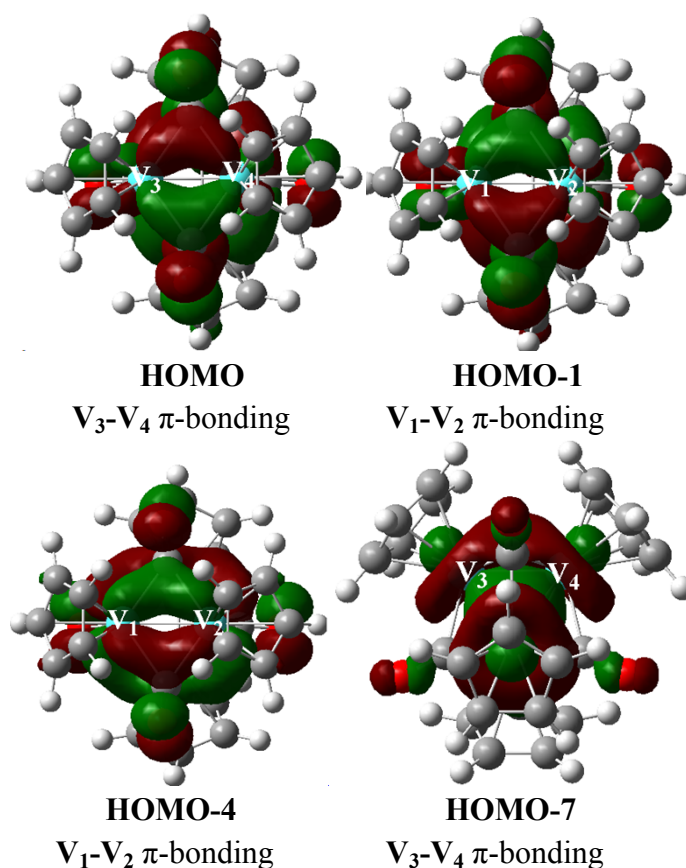

(a) The molecular orbital diagrams related to the V-V π-bonding of **4S-4**.

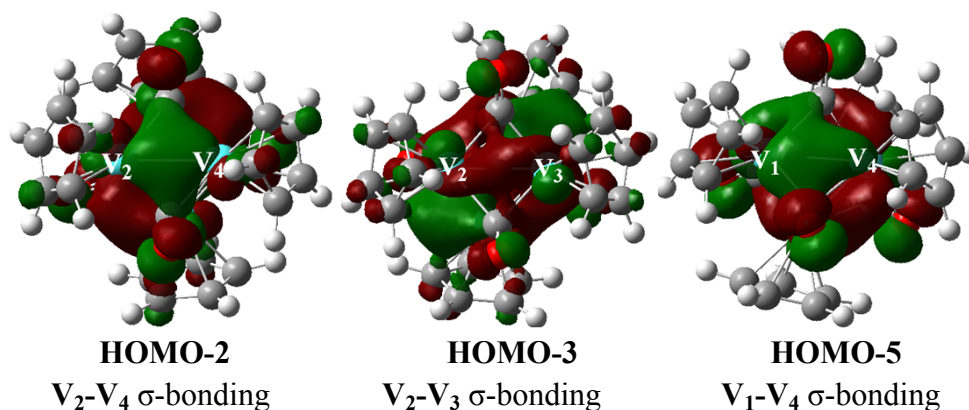

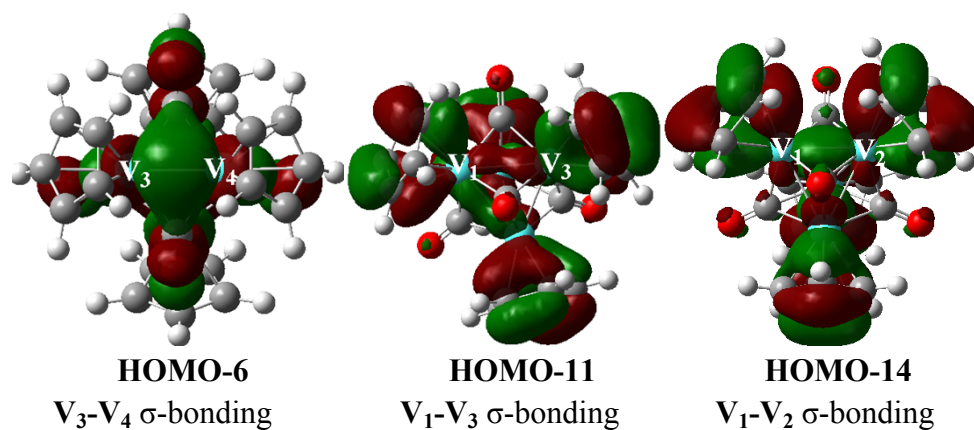

(b) The molecular orbital diagrams related to the V-V  $\sigma$ -bonding of 4S-4.

**Figure S9.** The comments and molecular orbital diagrams related to the V-V  $\pi$ -bonding orbitals (a) and V-V  $\sigma$ -bonding orbitals (b) of 4S-4.

**4S-5** has two short V-V triple bonds, namely, V<sub>1</sub>-V<sub>2</sub> and V<sub>3</sub>-V<sub>4</sub> with distance of 2.448 Å, and four longer V-V single bonds, i.e. 2.771 Å for V<sub>1</sub>-V<sub>3</sub>, 2.697 Å for V<sub>1</sub>-V<sub>4</sub>, 2.703 Å for V<sub>2</sub>-V<sub>3</sub> and 2.711 Å for V<sub>2</sub>-V<sub>4</sub>. This leads to 18-electron configurations for two vanadium atoms and 16-electron configurations for another two vanadium atoms. The molecular orbital diagrams of **4S-5** are shown in Figure S10. The HOMO, HOMO-5 and HOMO-6 orbitals can be regarded as two π-bonding orbitals and σ-bonding orbital of V<sub>1</sub>-V<sub>2</sub> triple bond, respectively. The HOMO-1, HOMO-7 and HOMO-14 orbitals are corresponding to two π-bonding orbitals and σ-bonding orbital of V<sub>3</sub>-V<sub>4</sub> triple bond, respectively. The HOMO-3, HOMO-13, HOMO-2 and HOMO-4 orbitals can be regarded as σ-bonding orbitals of V<sub>1</sub>-V<sub>3</sub>, V<sub>1</sub>-V<sub>4</sub>, V<sub>2</sub>-V<sub>3</sub> and V<sub>2</sub>-V<sub>4</sub> single bonds, respectively.

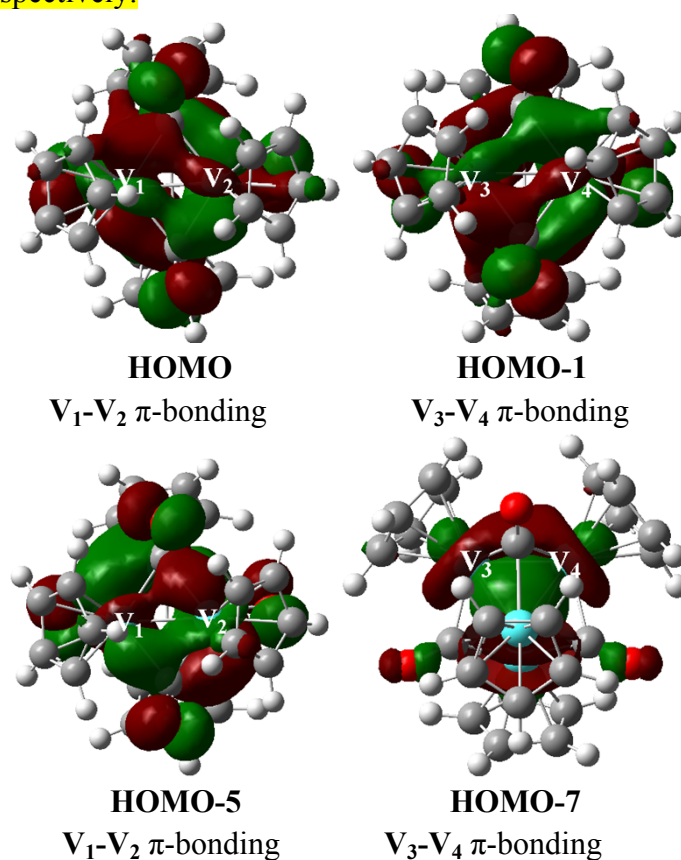

(a) The molecular orbital diagrams related to the V-V π-bonding of **4S-5**.

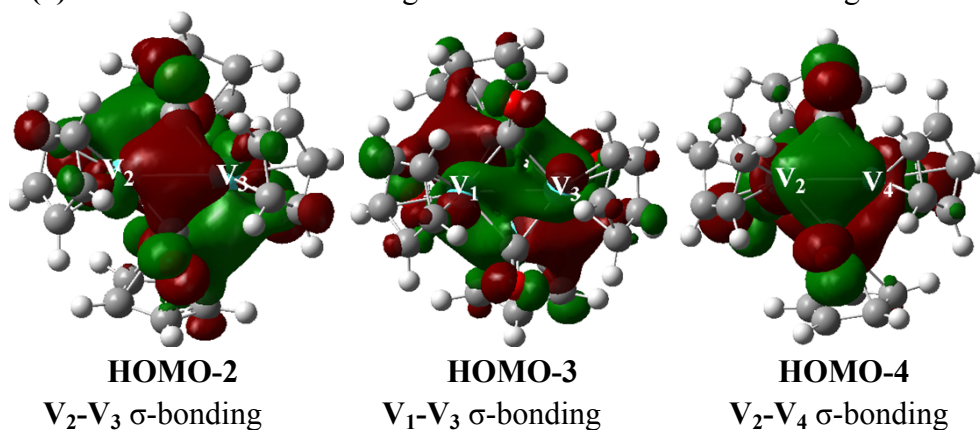

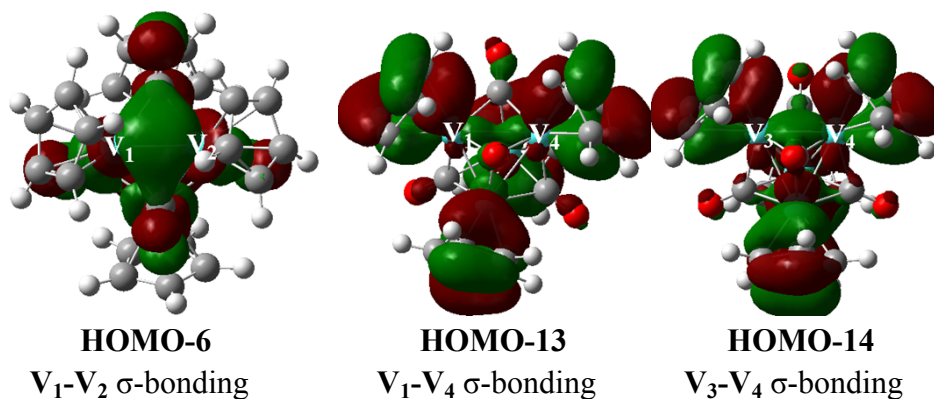

(b) The molecular orbital diagrams related to the V-V  $\sigma$ -bonding of 4S-5.

**Figure S10.** The comments and molecular orbital diagrams related to the V-V  $\pi$ -bonding orbitals (a) and V-V  $\sigma$ -bonding orbitals (b) of 4S-5.

**4T-2** has one short  $V_1-V_3$  triple bond with distance of 2.443 Å. The relatively longer V-V double bonds are with distance of 2.561 Å for  $V_1-V_2$ , 2.669 Å for  $V_1-V_4$  and 2.599 Å for  $V_3-V_4$ . The distance of  $V_2-V_4$  single bond is 2.993 Å. The distance for  $V_2 \cdots V_3$  is 3.874 Å, which is too long for any significant direct metal-metal interaction between these two vanadium atoms. The four-electron donor  $\eta^2-\mu_4-CO$  group in **4T-2** accommodates the electron deficiency of this structure, leading to 17-electron configurations for two vanadium atoms and 18-electron configurations for another two vanadium atoms. The molecular orbital diagrams of **4T-2** are shown in Figure S11. The HOMO-7, HOMO-16 and HOMO-13 orbitals can be assigned as two  $\pi$ -bonding orbitals and  $\sigma$ -bonding orbital of  $V_1-V_3$  triple bond, respectively. The HOMO-2 and HOMO-3 orbitals are corresponding to  $\pi$ -bonding orbital and  $\sigma$ -bonding orbital of  $V_1-V_2$  double bond, respectively. The HOMO-5 and HOMO-8 orbitals can be regarded as  $\pi$ -bonding orbital and  $\sigma$ -bonding orbital of  $V_1-V_4$  double bond, respectively. The HOMO-14 and HOMO-4 orbitals can be regarded as  $\pi$ -bonding orbital and  $\sigma$ -bonding orbital of  $V_3-V_4$  double bond, respectively. The HOMO-6 orbital is consistent with  $\sigma$ -bonding orbital of  $V_2-V_4$  single bond.

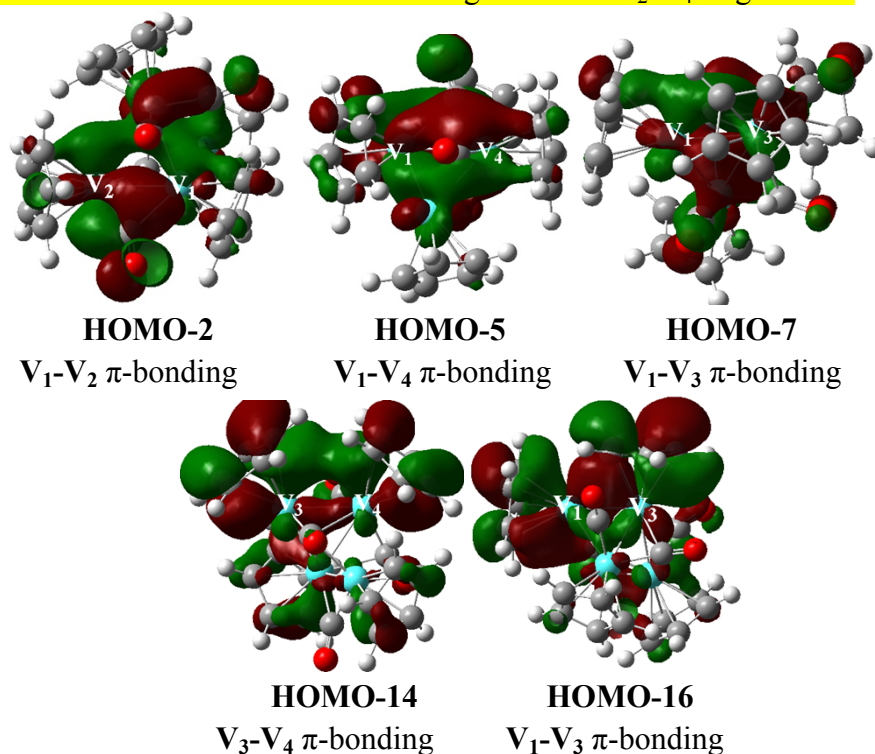

(a) The molecular orbital diagrams related to the V-V  $\pi$ -bonding of **4T-2**.

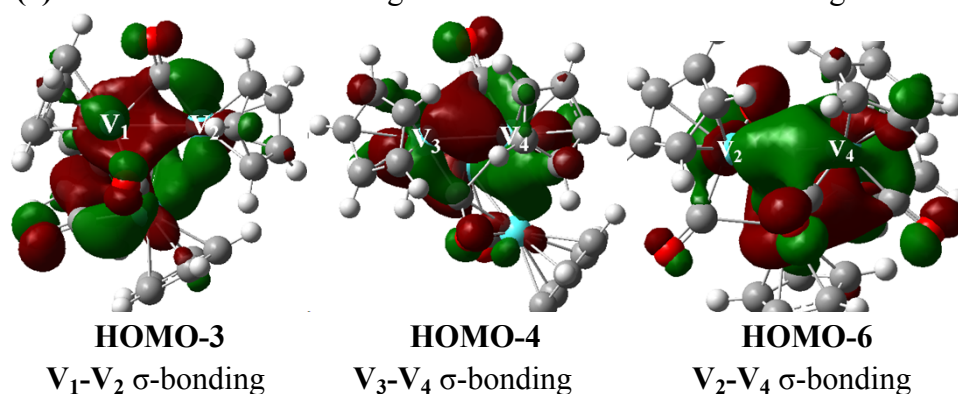

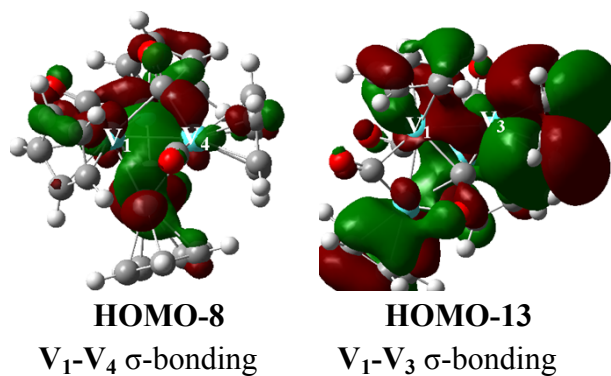

(b) The molecular orbital diagrams related to the V-V  $\sigma$ -bonding of 4T-2.

**Figure S11.** The comments and molecular orbital diagrams related to the V-V  $\pi$ -bonding orbitals (a) and V-V  $\sigma$ -bonding orbitals (b) of 4T-2.

**4T-3** has one short  $V_1-V_2$  double bond with distance of 2.678 Å. The other five V-V single bonds are relatively long with distance of 2.910, 2.951, 2.951, 2.910 and 3.016 Å for  $V_1-V_3$ ,  $V_1-V_4$ ,  $V_2-V_3$ ,  $V_2-V_4$  and  $V_3-V_4$ , respectively. This leads to 16-electron configurations for two vanadium atoms and 15-electron configurations for another two vanadium atoms. The molecular orbital diagrams of **4T-3** are shown in Figure S12. The HOMO-3 and HOMO-8 orbitals can be assigned as  $\pi$ -bonding orbital and  $\sigma$ -bonding orbital of  $V_1-V_2$  double bond, respectively. The HOMO-2, HOMO-4, HOMO-7, HOMO-6 and HOMO-5 orbitals are corresponding to  $\sigma$ -bonding orbitals of  $V_1-V_3$ ,  $V_1-V_4$ ,  $V_2-V_3$ ,  $V_2-V_4$  and  $V_3-V_4$  single bonds, respectively.

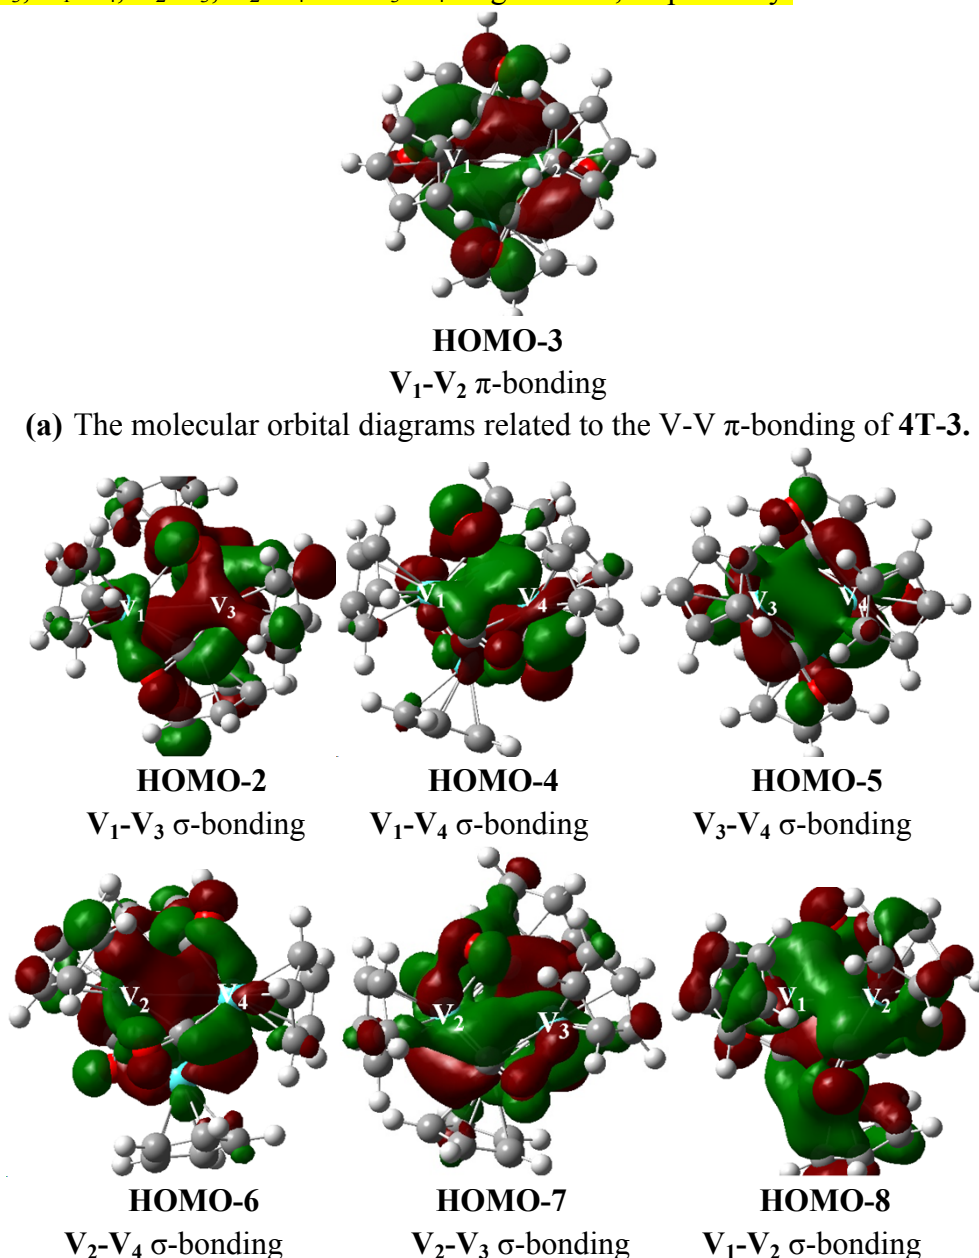

(b) The molecular orbital diagrams related to the V-V  $\sigma$ -bonding of **4T-3**

**Figure S12.** The comments and molecular orbital diagrams related to the V-V  $\pi$ -bonding orbitals (a) and V-V  $\sigma$ -bonding orbitals (b) of **4T-3**.



**4Q-1** has one short  $V_3$ - $V_4$  triple bond with distance of 2.572 Å. The other five V-V single bonds of **4Q-1** are relatively longer, namely, 2.964 Å for  $V_1$ - $V_2$ , 2.932 Å for  $V_1$ - $V_3$ , 2.975 Å for  $V_1$ - $V_4$ , 2.727 Å for  $V_2$ - $V_3$  and 2.907 Å for  $V_2$ - $V_4$ . This leads to 17-electron configurations for two vanadium atoms and 15-electron configurations for another two vanadium atoms. The molecular orbital diagrams of **4Q-1** are shown in Figure S13. The HOMO-7, HOMO-17 and HOMO-6 orbitals can be assigned as two  $\pi$ -bonding orbitals and  $\sigma$ -bonding orbital of  $V_3$ - $V_4$  triple bond, respectively. The SOMO and SOMO-1 orbitals are consistent with two half-filled  $\sigma$ -bonding orbitals of  $V_1$ - $V_3$  single bond. The HOMO-8, HOMO-9, HOMO-13 and HOMO-5 orbitals are corresponding to the  $\sigma$ -bonding orbitals of  $V_1$ - $V_2$ ,  $V_1$ - $V_4$ ,  $V_2$ - $V_3$  and  $V_2$ - $V_4$  single bonds, respectively.

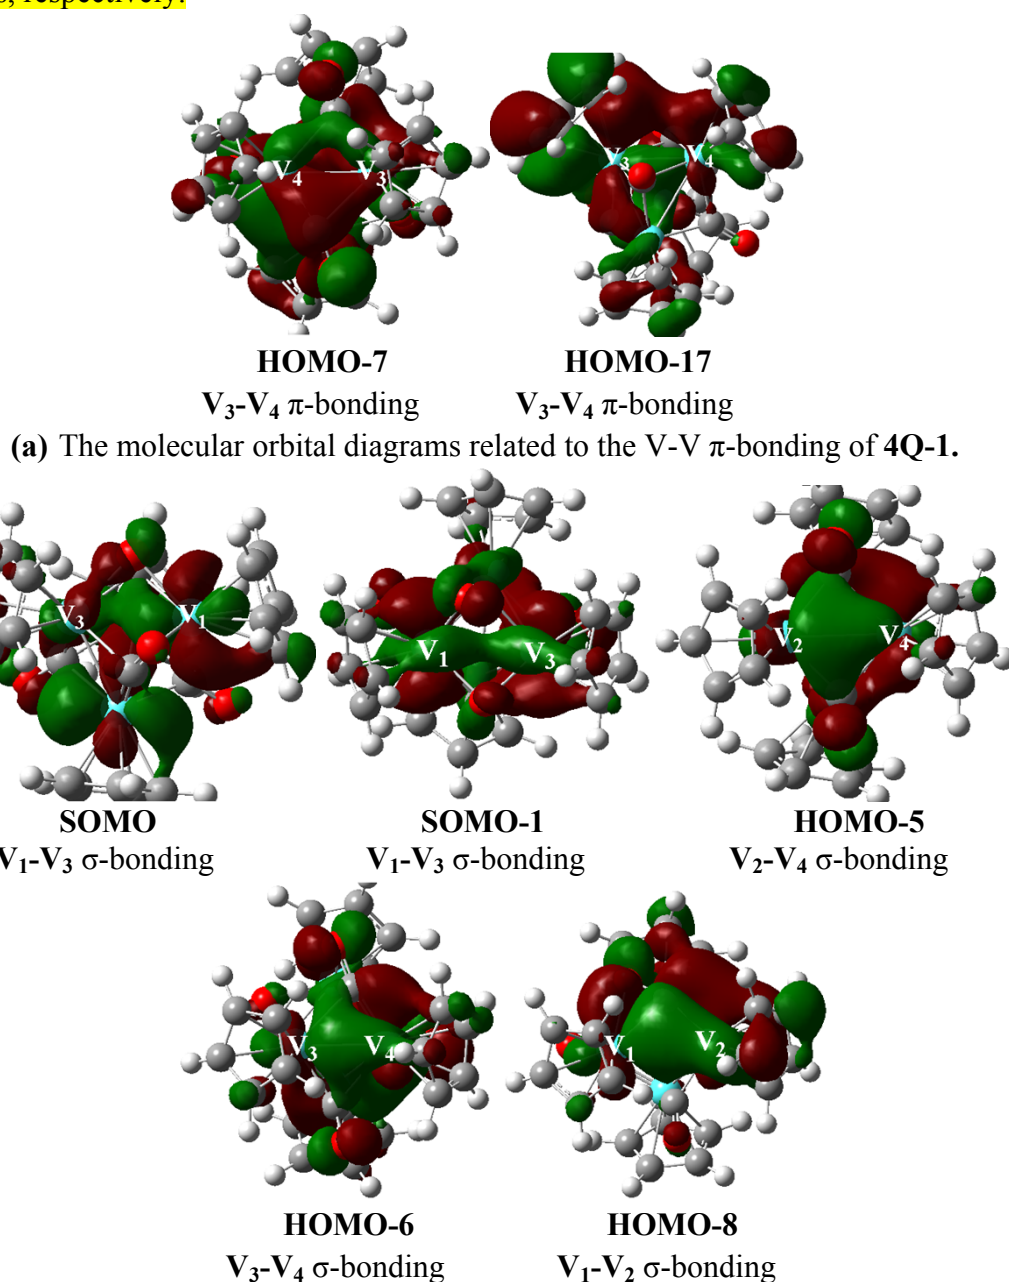

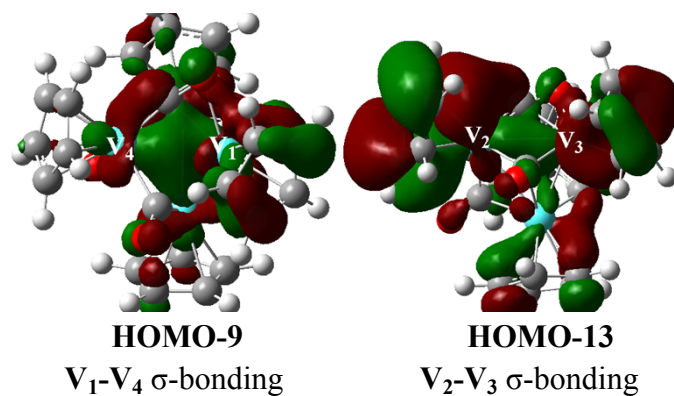

(b) The molecular orbital diagrams related to the V-V  $\sigma$ -bonding of 4Q-1.

**Figure S13.** The comments and molecular orbital diagrams related to the V-V  $\pi$ -bonding orbitals (a) and V-V  $\sigma$ -bonding orbitals (b) of 4Q-1.

**4Q-2** has four short V-V double bonds, namely, 2.435 Å for V<sub>1</sub>-V<sub>2</sub>, 2.676 Å for V<sub>1</sub>-V<sub>3</sub>, 2.526 Å for V<sub>2</sub>-V<sub>4</sub> and 2.439 Å for V<sub>3</sub>-V<sub>4</sub>. The distances for the other two V<sub>1</sub>-V<sub>4</sub> and V<sub>2</sub>-V<sub>3</sub> single bonds are 2.949 and 2.997 Å, respectively. This leads to 17-electron configuration for each vanadium atom. The molecular orbital diagrams of **4Q-2** are shown in Figure S14. The HOMO-17 and HOMO-7 orbitals are corresponding to  $\pi$ -bonding orbital and  $\sigma$ -bonding orbital of V<sub>1</sub>-V<sub>2</sub> double bond, respectively. The HOMO-9, SOMO and SOMO-3 orbitals can be regarded as  $\pi$ -bonding orbital and two half-filled  $\sigma$ -bonding orbitals of V<sub>1</sub>-V<sub>3</sub> double bond, respectively. The HOMO-4 and HOMO-5 orbitals can be assigned to  $\pi$ -bonding orbital and  $\sigma$ -bonding orbital of V<sub>2</sub>-V<sub>4</sub> double bond, respectively. The HOMO-16 and HOMO-8 orbitals are corresponding to  $\pi$ -bonding orbital and  $\sigma$ -bonding orbital of V<sub>3</sub>-V<sub>4</sub> double bond, respectively. The HOMO-6 and HOMO-13 orbitals can be considered as  $\sigma$ -bonding orbitals of V<sub>1</sub>-V<sub>4</sub> and V<sub>2</sub>-V<sub>3</sub> single bonds, respectively.

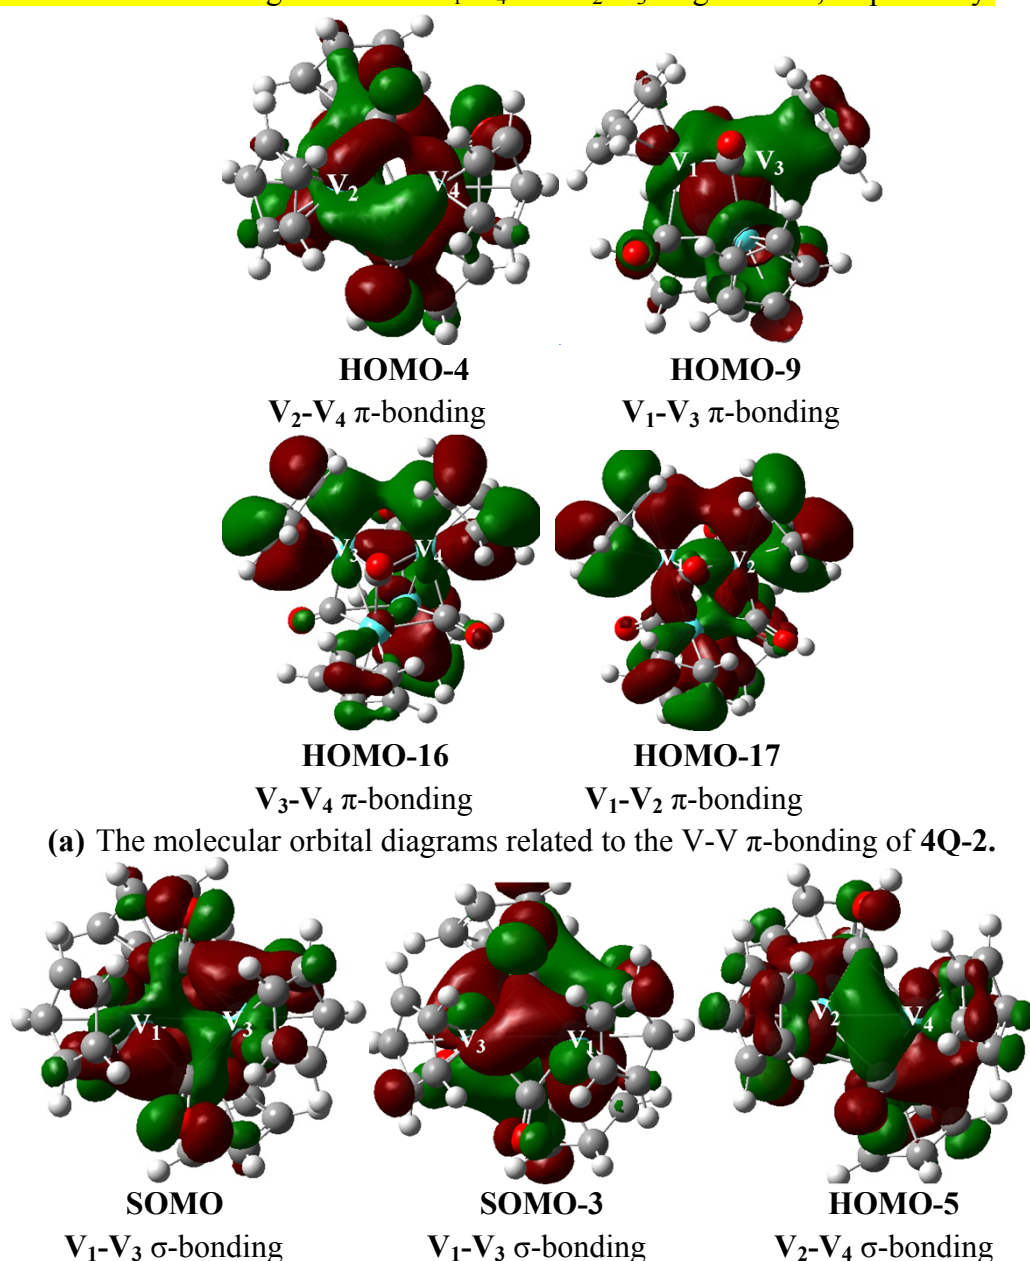

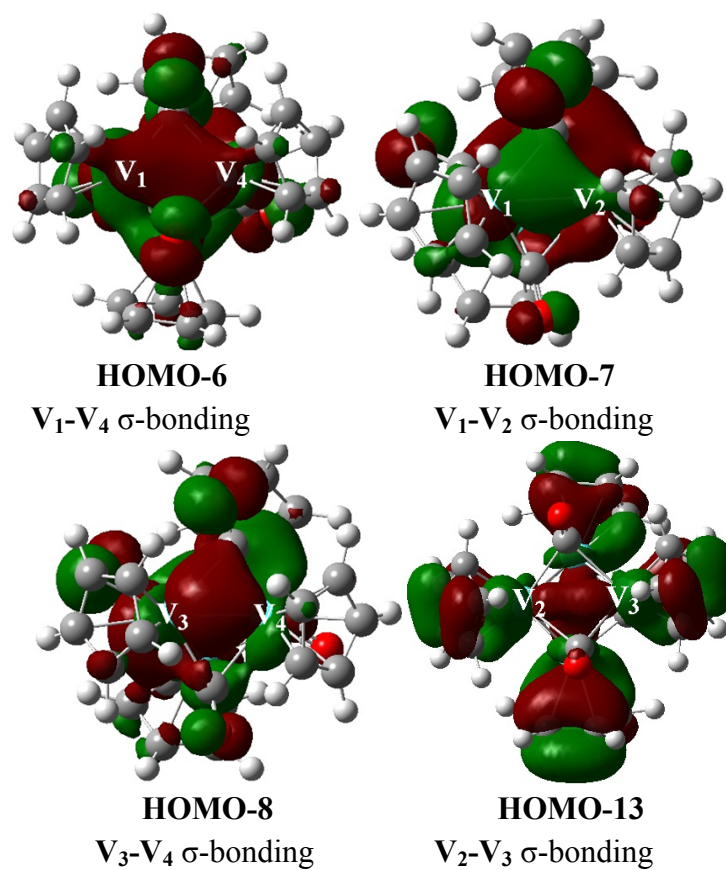

(b) The molecular orbital diagrams related to the V-V  $\sigma$ -bonding of 4Q-2.

**Figure S14.** The comments and molecular orbital diagrams related to the V-V  $\pi$ -bonding orbitals (a) and V-V  $\sigma$ -bonding orbitals (b) of 4Q-2.

**9S-1** has three equal V-V single bonds, namely V<sub>1</sub>-V<sub>2</sub>, V<sub>1</sub>-V<sub>3</sub> and V<sub>2</sub>-V<sub>3</sub> with distance of 3.376 Å. This leads to 18-electron configuration for each vanadium atom. The molecular orbital diagrams of **9S-1** are shown in Figure S15. HOMO-2, HOMO-3, and HOMO-5 orbitals are consistent with  $\sigma$ -bonding orbitals of V<sub>1</sub>-V<sub>2</sub>, V<sub>1</sub>-V<sub>3</sub> and V<sub>2</sub>-V<sub>3</sub> single bonds, respectively.

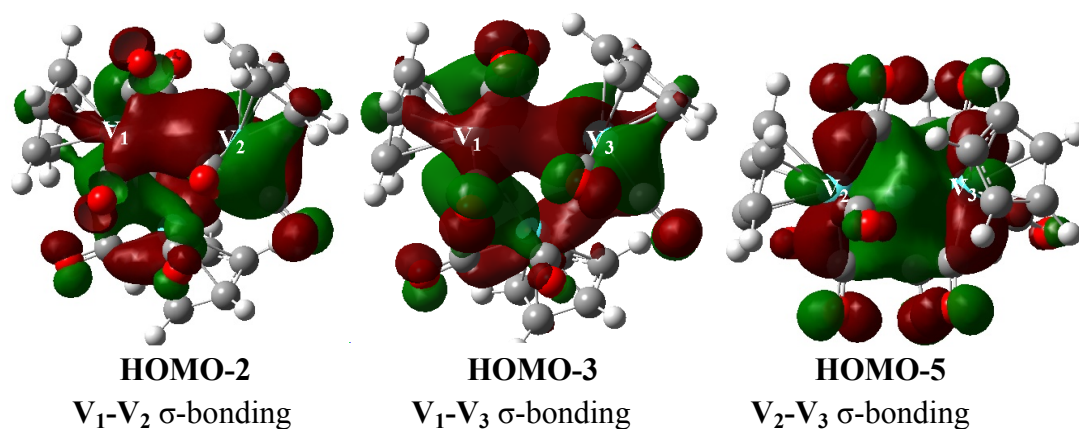

**Figure S15.** The comments and molecular orbital diagrams related to the V-V  $\sigma$ -bonding orbitals of **9S-1**.

**Table S18.** Theoretical cartesian coordinates (in Å) for the structure of  $\text{Cp}_4\text{V}_4(\text{CO})_4$  **4S-1** using the BP86 method.

Standard orientation:

| Atomic Number | Coordinates (Angstroms) |           |           |
|---------------|-------------------------|-----------|-----------|
|               | X                       | Y         | Z         |
| 6             | -1.715736               | 0.111456  | 3.385156  |
| 6             | -2.849004               | 0.675497  | 2.707010  |
| 1             | -3.172318               | 1.718527  | 2.750457  |
| 6             | -3.472774               | -0.376109 | 1.964922  |
| 1             | -4.330381               | -0.260827 | 1.298338  |
| 6             | -1.639690               | -1.277098 | 3.046026  |
| 1             | -0.880963               | -1.986058 | 3.385306  |
| 6             | -2.726806               | -1.583463 | 2.162719  |
| 1             | -2.927810               | -2.553498 | 1.701941  |
| 1             | -1.032683               | 0.655504  | 4.040710  |
| 6             | 2.726806                | 1.583463  | 2.162719  |
| 6             | 1.639690                | 1.277098  | 3.046026  |
| 1             | 0.880963                | 1.986058  | 3.385306  |
| 6             | 1.715736                | -0.111456 | 3.385156  |
| 1             | 1.032683                | -0.655504 | 4.040710  |
| 6             | 3.472774                | 0.376109  | 1.964922  |
| 1             | 4.330381                | 0.260827  | 1.298338  |
| 6             | 2.849004                | -0.675497 | 2.707010  |
| 1             | 3.172318                | -1.718527 | 2.750457  |
| 1             | 2.927810                | 2.553498  | 1.701941  |
| 6             | 1.277098                | -1.639690 | -3.046026 |
| 6             | 1.583463                | -2.726806 | -2.162719 |
| 1             | 2.553498                | -2.927810 | -1.701941 |
| 6             | 0.376109                | -3.472774 | -1.964922 |

|    |           |           |           |
|----|-----------|-----------|-----------|
| 1  | 0.260827  | -4.330381 | -1.298338 |
| 6  | -0.111456 | -1.715736 | -3.385156 |
| 1  | -0.655504 | -1.032683 | -4.040710 |
| 6  | -0.675497 | -2.849004 | -2.707010 |
| 1  | -1.718527 | -3.172318 | -2.750457 |
| 1  | 1.986058  | -0.880963 | -3.385306 |
| 6  | 0.675497  | 2.849004  | -2.707010 |
| 6  | 0.111456  | 1.715736  | -3.385156 |
| 1  | 0.655504  | 1.032683  | -4.040710 |
| 6  | -1.277098 | 1.639690  | -3.046026 |
| 1  | -1.986058 | 0.880963  | -3.385306 |
| 6  | -0.376109 | 3.472774  | -1.964922 |
| 1  | -0.260827 | 4.330381  | -1.298338 |
| 6  | -1.583463 | 2.726806  | -2.162719 |
| 1  | -2.553498 | 2.927810  | -1.701941 |
| 1  | 1.718527  | 3.172318  | -2.750457 |
| 23 | 1.343007  | 0.037873  | 1.089662  |
| 23 | -1.343007 | -0.037873 | 1.089662  |
| 23 | -0.037873 | 1.343007  | -1.089662 |
| 23 | 0.037873  | -1.343007 | -1.089662 |
| 6  | 0.497026  | -1.583463 | 0.944179  |
| 6  | -0.497026 | 1.583463  | 0.944179  |
| 6  | -1.583463 | -0.497026 | -0.944179 |
| 6  | 1.583463  | 0.497026  | -0.944179 |
| 8  | 0.011803  | 2.700687  | 0.677740  |
| 8  | -2.700687 | 0.011803  | -0.677740 |
| 8  | -0.011803 | -2.700687 | 0.677740  |
| 8  | 2.700687  | -0.011803 | -0.677740 |

---

**Table S19.** Theoretical cartesian coordinates (in Å) for the structure of  $\text{Cp}_4\text{V}_4(\text{CO})_4$  **4S-2** using the BP86 method.

Standard orientation:

| Atomic Number | Coordinates (Angstroms) |           |           |
|---------------|-------------------------|-----------|-----------|
|               | X                       | Y         | Z         |
| 23            | 0.061574                | -1.351544 | 0.534845  |
| 23            | -1.962869               | -0.177205 | -0.636812 |
| 23            | 1.880484                | -0.232444 | -0.527623 |
| 23            | 0.159146                | 1.301948  | 0.652984  |
| 6             | -3.415241               | 1.408387  | -1.568392 |
| 6             | -3.703756               | 0.128819  | -2.144342 |
| 1             | -3.559462               | -0.144412 | -3.193470 |
| 6             | -4.127263               | -0.748864 | -1.099664 |
| 1             | -4.413953               | -1.797743 | -1.204644 |
| 6             | -3.654126               | 1.324473  | -0.160021 |
| 1             | -3.538907               | 2.132994  | 0.564890  |
| 6             | -4.097215               | -0.008191 | 0.134104  |
| 1             | -4.336187               | -0.404866 | 1.123903  |
| 1             | -3.044244               | 2.277993  | -2.117725 |
| 6             | 1.602072                | -2.767219 | -0.431555 |
| 6             | 0.390172                | -3.492045 | -0.122029 |
| 1             | -0.253751               | -3.996307 | -0.845105 |
| 6             | 0.229874                | -3.502313 | 1.306012  |
| 1             | -0.604731               | -3.959417 | 1.842112  |
| 6             | 2.152056                | -2.273259 | 0.815103  |
| 1             | 3.135687                | -1.816353 | 0.976895  |
| 6             | 1.278406                | -2.723131 | 1.877478  |
| 1             | 1.404442                | -2.471283 | 2.934521  |
| 1             | 2.077263                | -2.748839 | -1.415843 |



|   |           |           |           |
|---|-----------|-----------|-----------|
| 6 | 0.594274  | 3.361340  | -0.309115 |
| 6 | -0.811014 | 3.270095  | -0.051033 |
| 1 | -1.600579 | 3.300080  | -0.802635 |
| 6 | -0.992560 | 3.164477  | 1.370676  |
| 1 | -1.944518 | 3.074150  | 1.899455  |
| 6 | 1.276850  | 3.306497  | 0.948198  |
| 1 | 2.356476  | 3.346004  | 1.110122  |
| 6 | 0.295231  | 3.190159  | 1.988000  |
| 1 | 0.500887  | 3.105547  | 3.057944  |
| 1 | 1.054773  | 3.460079  | -1.294499 |
| 6 | 2.909229  | -0.226430 | -2.609665 |
| 6 | 3.856438  | -0.691447 | -1.641622 |
| 1 | 4.303445  | -1.690037 | -1.605345 |
| 6 | 4.113549  | 0.374385  | -0.715200 |
| 1 | 4.789974  | 0.336486  | 0.143814  |
| 6 | 2.580009  | 1.129327  | -2.283682 |
| 1 | 1.870983  | 1.754977  | -2.830995 |
| 6 | 3.327812  | 1.503704  | -1.119759 |
| 1 | 3.328612  | 2.484289  | -0.642545 |
| 1 | 2.489897  | -0.801807 | -3.440030 |
| 6 | 0.104809  | -0.112670 | -1.181492 |
| 8 | -0.755476 | 0.061847  | -2.152050 |
| 6 | 1.552293  | 0.570247  | 1.703181  |
| 8 | 2.408427  | 0.328489  | 2.517951  |
| 6 | -1.983112 | -1.972150 | 0.040453  |
| 8 | -2.567109 | -2.986244 | 0.356752  |
| 6 | -1.101249 | 0.288867  | 1.689196  |
| 8 | -1.768721 | -0.141247 | 2.601365  |

---

**Table S20.** Theoretical cartesian coordinates (in Å) for the structure of  $\text{Cp}_4\text{V}_4(\text{CO})_4$  **4S-3** using the BP86 method.

| Standard orientation: |                         |           |           |
|-----------------------|-------------------------|-----------|-----------|
| Atomic Number         | Coordinates (Angstroms) |           |           |
|                       | X                       | Y         | Z         |
| 23                    | -0.893702               | -1.159831 | -0.642795 |
| 6                     | -1.660768               | -1.870876 | -2.684586 |
| 6                     | -1.142835               | -2.998004 | -1.951000 |
| 6                     | -1.958988               | -3.190765 | -0.792023 |
| 6                     | -2.983869               | -2.178453 | -0.802962 |
| 6                     | -2.803638               | -1.380205 | -1.975705 |
| 1                     | -1.246632               | -1.457187 | -3.607029 |
| 1                     | -0.252879               | -3.574286 | -2.216874 |
| 1                     | -1.824625               | -3.957284 | -0.024622 |
| 1                     | -3.764572               | -2.053312 | -0.048455 |
| 23                    | 1.300347                | -0.861283 | 0.611910  |
| 6                     | 2.289216                | -1.563069 | 2.561692  |
| 6                     | 2.027967                | -2.707976 | 1.725584  |
| 6                     | 2.810337                | -2.579483 | 0.535382  |
| 6                     | 3.551811                | -1.350182 | 0.625749  |
| 6                     | 3.235109                | -0.735550 | 1.880944  |
| 1                     | 1.824872                | -1.350911 | 3.527947  |
| 1                     | 1.320134                | -3.509332 | 1.951319  |
| 1                     | 2.824335                | -3.272786 | -0.308975 |
| 1                     | 4.231250                | -0.958732 | -0.135351 |
| 23                    | 0.848371                | 1.121006  | -0.719610 |
| 6                     | 2.808661                | 2.350183  | -0.647423 |
| 6                     | 1.697751                | 3.269231  | -0.582644 |
| 6                     | 0.960131                | 3.156402  | -1.796994 |

|    |           |           |           |
|----|-----------|-----------|-----------|
| 6  | 1.605225  | 2.164088  | -2.616010 |
| 6  | 2.756914  | 1.684864  | -1.911823 |
| 1  | 3.554548  | 2.196481  | 0.136108  |
| 1  | 1.453731  | 3.912227  | 0.266325  |
| 1  | 0.033913  | 3.679247  | -2.045986 |
| 1  | 1.257762  | 1.814441  | -3.592354 |
| 23 | -1.233552 | 0.887384  | 0.662555  |
| 6  | -3.497729 | 1.264138  | 0.926844  |
| 6  | -2.814296 | 2.528852  | 0.932318  |
| 6  | -1.934456 | 2.542656  | 2.062080  |
| 6  | -2.069134 | 1.293280  | 2.760241  |
| 6  | -3.042053 | 0.510512  | 2.055457  |
| 1  | -4.227407 | 0.937737  | 0.181504  |
| 1  | -2.934320 | 3.324664  | 0.192831  |
| 1  | -1.239543 | 3.344453  | 2.327460  |
| 1  | -1.522303 | 0.990908  | 3.656402  |
| 6  | 1.267180  | -1.034916 | -1.288343 |
| 8  | 1.636787  | -1.381983 | -2.398307 |
| 6  | -0.851914 | -1.491075 | 1.215006  |
| 8  | -1.014955 | -1.919491 | 2.337266  |
| 6  | -1.381336 | 1.167333  | -1.177832 |
| 8  | -1.708232 | 1.528485  | -2.295324 |
| 6  | 0.868064  | 1.191502  | 1.299182  |
| 8  | 1.249853  | 1.754853  | 2.307712  |
| 1  | 3.598676  | 0.232324  | 2.235854  |
| 1  | -3.345920 | -0.505185 | 2.319452  |
| 1  | -3.398193 | -0.509935 | -2.262296 |
| 1  | 3.431754  | 0.899285  | -2.260222 |

---

**Table S21.** Theoretical cartesian coordinates (in Å) for the structure of  $\text{Cp}_4\text{V}_4(\text{CO})_4$  **4S-4** using the BP86 method.

| Standard orientation: |                         |           |           |
|-----------------------|-------------------------|-----------|-----------|
| Atomic Number         | Coordinates (Angstroms) |           |           |
|                       | X                       | Y         | Z         |
| 23                    | 0.000000                | -1.220470 | 1.041788  |
| 6                     | 1.161657                | -2.918232 | 2.048221  |
| 6                     | 0.715152                | -2.017871 | 3.074966  |
| 6                     | -0.715152               | -2.017871 | 3.074966  |
| 6                     | -1.161657               | -2.918232 | 2.048221  |
| 6                     | 0.000000                | -3.478820 | 1.422139  |
| 1                     | 2.202373                | -3.114304 | 1.778439  |
| 1                     | 1.365107                | -1.413084 | 3.711562  |
| 1                     | -1.365107               | -1.413084 | 3.711562  |
| 1                     | -2.202373               | -3.114304 | 1.778439  |
| 23                    | 0.000000                | 1.220470  | 1.041788  |
| 6                     | -1.161657               | 2.918232  | 2.048221  |
| 6                     | -0.715152               | 2.017871  | 3.074966  |
| 6                     | 0.715152                | 2.017871  | 3.074966  |
| 6                     | 1.161657                | 2.918232  | 2.048221  |
| 6                     | 0.000000                | 3.478820  | 1.422139  |
| 1                     | -2.202373               | 3.114304  | 1.778439  |
| 1                     | -1.365107               | 1.413084  | 3.711562  |
| 1                     | 1.365107                | 1.413084  | 3.711562  |
| 1                     | 2.202373                | 3.114304  | 1.778439  |
| 23                    | 1.220470                | 0.000000  | -1.041788 |
| 6                     | 2.918232                | 1.161657  | -2.048221 |
| 6                     | 2.017871                | 0.715152  | -3.074966 |
| 6                     | 2.017871                | -0.715152 | -3.074966 |

|    |           |           |           |
|----|-----------|-----------|-----------|
| 6  | 2.918232  | -1.161657 | -2.048221 |
| 6  | 3.478820  | 0.000000  | -1.422139 |
| 1  | 3.114304  | 2.202373  | -1.778439 |
| 1  | 1.413084  | 1.365107  | -3.711562 |
| 1  | 1.413084  | -1.365107 | -3.711562 |
| 1  | 3.114304  | -2.202373 | -1.778439 |
| 23 | -1.220470 | 0.000000  | -1.041788 |
| 6  | -2.918232 | -1.161657 | -2.048221 |
| 6  | -2.017871 | -0.715152 | -3.074966 |
| 6  | -2.017871 | 0.715152  | -3.074966 |
| 6  | -2.918232 | 1.161657  | -2.048221 |
| 6  | -3.478820 | 0.000000  | -1.422139 |
| 1  | -3.114304 | -2.202373 | -1.778439 |
| 1  | -1.413084 | -1.365107 | -3.711562 |
| 1  | -1.413084 | 1.365107  | -3.711562 |
| 1  | -3.114304 | 2.202373  | -1.778439 |
| 6  | 1.707368  | 0.000000  | 1.034556  |
| 8  | 2.785119  | 0.000000  | 1.618808  |
| 6  | -1.707368 | 0.000000  | 1.034556  |
| 8  | -2.785119 | 0.000000  | 1.618808  |
| 6  | 0.000000  | -1.707368 | -1.034556 |
| 8  | 0.000000  | -2.785119 | -1.618808 |
| 6  | 0.000000  | 1.707368  | -1.034556 |
| 8  | 0.000000  | 2.785119  | -1.618808 |
| 1  | 0.000000  | 4.164049  | 0.571279  |
| 1  | -4.164049 | 0.000000  | -0.571279 |
| 1  | 0.000000  | -4.164049 | 0.571279  |
| 1  | 4.164049  | 0.000000  | -0.571279 |

---

**Table S22.** Theoretical cartesian coordinates (in Å) for the structure of  $\text{Cp}_4\text{V}_4(\text{CO})_4$  **4S-5** using the BP86 method.

| Standard orientation: |                         |           |           |
|-----------------------|-------------------------|-----------|-----------|
| Atomic Number         | Coordinates (Angstroms) |           |           |
|                       | X                       | Y         | Z         |
| 23                    | 0.870439                | 1.029864  | 0.858725  |
| 6                     | 2.897161                | 1.466593  | 1.874688  |
| 6                     | 2.611402                | 2.525053  | 0.956879  |
| 6                     | 1.411284                | 3.183696  | 1.394793  |
| 6                     | 0.963567                | 2.527931  | 2.592770  |
| 6                     | 1.877605                | 1.467606  | 2.886455  |
| 1                     | 3.714471                | 0.745956  | 1.794712  |
| 1                     | 3.178266                | 2.761420  | 0.053279  |
| 1                     | 0.928961                | 4.035061  | 0.908200  |
| 1                     | 0.056930                | 2.768650  | 3.152863  |
| 23                    | -0.851604               | 1.049206  | -0.881655 |
| 6                     | -2.892985               | 1.953432  | -1.418506 |
| 6                     | -2.063569               | 3.004499  | -0.903103 |
| 6                     | -0.939949               | 3.155416  | -1.776285 |
| 6                     | -1.073773               | 2.198281  | -2.842049 |
| 6                     | -2.282878               | 1.463197  | -2.621576 |
| 1                     | -3.810054               | 1.576078  | -0.958738 |
| 1                     | -2.237725               | 3.549105  | 0.027902  |
| 1                     | -0.108442               | 3.853014  | -1.649798 |
| 1                     | -0.358670               | 2.043731  | -3.653612 |
| 23                    | 0.851604                | -1.049206 | -0.881655 |
| 6                     | 2.282878                | -1.463197 | -2.621576 |
| 6                     | 1.073773                | -2.198281 | -2.842049 |
| 6                     | 0.939949                | -3.155416 | -1.776285 |

|    |           |           |           |
|----|-----------|-----------|-----------|
| 6  | 2.063569  | -3.004499 | -0.903103 |
| 6  | 2.892985  | -1.953432 | -1.418506 |
| 1  | 2.646454  | -0.628106 | -3.225131 |
| 1  | 0.358670  | -2.043731 | -3.653612 |
| 1  | 0.108442  | -3.853014 | -1.649798 |
| 1  | 2.237725  | -3.549105 | 0.027902  |
| 23 | -0.870439 | -1.029864 | 0.858725  |
| 6  | -1.877605 | -1.467606 | 2.886455  |
| 6  | -0.963567 | -2.527931 | 2.592770  |
| 6  | -1.411284 | -3.183696 | 1.394793  |
| 6  | -2.611402 | -2.525053 | 0.956879  |
| 6  | -2.897161 | -1.466593 | 1.874688  |
| 1  | -1.789392 | -0.747265 | 3.703376  |
| 1  | -0.056930 | -2.768650 | 3.152863  |
| 1  | -0.928961 | -4.035061 | 0.908200  |
| 1  | -3.178266 | -2.761420 | 0.053279  |
| 6  | 1.204196  | 1.037018  | -1.219330 |
| 8  | 1.989575  | 1.603098  | -1.971909 |
| 6  | -1.204196 | 1.054250  | 1.176465  |
| 8  | -1.971855 | 1.627039  | 1.942801  |
| 6  | 1.204196  | -1.054250 | 1.176465  |
| 8  | 1.971855  | -1.627039 | 1.942801  |
| 6  | -1.204196 | -1.037018 | -1.219330 |
| 8  | -1.989575 | -1.603098 | -1.971909 |
| 1  | -2.646454 | 0.628106  | -3.225131 |
| 1  | -3.714471 | -0.745956 | 1.794712  |
| 1  | 1.789392  | 0.747265  | 3.703376  |
| 1  | 3.810054  | -1.576078 | -0.958738 |

---

**Table S23.** Theoretical cartesian coordinates (in Å) for the structure of  $\text{Cp}_4\text{V}_4(\text{CO})_4$  **4T-1** using the BP86 method.

| Standard orientation: |                         |           |           |
|-----------------------|-------------------------|-----------|-----------|
| Atomic Number         | Coordinates (Angstroms) |           |           |
|                       | X                       | Y         | Z         |
| 6                     | -2.168823               | -2.313215 | 2.199218  |
| 6                     | -0.930432               | -3.039384 | 2.075045  |
| 1                     | -0.777158               | -3.951426 | 1.492686  |
| 6                     | 0.059472                | -2.352643 | 2.846015  |
| 1                     | 1.115614                | -2.619309 | 2.930353  |
| 6                     | -1.936114               | -1.195861 | 3.068244  |
| 1                     | -2.664689               | -0.421097 | 3.320135  |
| 6                     | -0.561566               | -1.210018 | 3.457068  |
| 1                     | -0.057047               | -0.473578 | 4.086533  |
| 1                     | -3.117127               | -2.574768 | 1.721742  |
| 6                     | -2.104993               | -0.682136 | -3.059440 |
| 6                     | -2.809568               | -1.322451 | -1.980464 |
| 1                     | -2.761387               | -2.384978 | -1.732013 |
| 6                     | -3.560444               | -0.327784 | -1.281468 |
| 1                     | -4.185493               | -0.487581 | -0.399726 |
| 6                     | -2.443564               | 0.706873  | -3.029752 |
| 1                     | -2.035461               | 1.477080  | -3.689819 |
| 6                     | -3.324661               | 0.937725  | -1.923531 |
| 1                     | -3.743010               | 1.899924  | -1.617106 |
| 1                     | -1.431058               | -1.172338 | -3.766283 |
| 6                     | 1.712714                | 3.502303  | 0.010441  |
| 6                     | 0.355550                | 3.963294  | 0.154981  |
| 1                     | -0.223414               | 4.496514  | -0.604721 |
| 6                     | -0.109657               | 3.568187  | 1.450657  |



|    |           |           |           |
|----|-----------|-----------|-----------|
| 1  | -1.116395 | 3.723645  | 1.846969  |
| 6  | 2.072143  | 2.814657  | 1.208105  |
| 1  | 3.015786  | 2.304728  | 1.414054  |
| 6  | 0.942614  | 2.842496  | 2.094681  |
| 1  | 0.898011  | 2.374909  | 3.080643  |
| 1  | 2.338479  | 3.627593  | -0.878012 |
| 6  | 3.015330  | -1.683748 | -2.286012 |
| 6  | 3.427010  | -0.369726 | -1.888065 |
| 1  | 3.524846  | 0.497279  | -2.545919 |
| 6  | 3.622241  | -0.379905 | -0.468631 |
| 1  | 3.913568  | 0.467974  | 0.154039  |
| 6  | 3.013280  | -2.517999 | -1.113466 |
| 1  | 2.695190  | -3.563296 | -1.081658 |
| 6  | 3.376840  | -1.717202 | 0.006363  |
| 1  | 3.421425  | -2.032975 | 1.050766  |
| 1  | 2.742063  | -1.996710 | -3.297344 |
| 23 | -1.318748 | 0.206240  | -1.068920 |
| 23 | -0.670828 | -0.961983 | 1.152164  |
| 23 | 1.412329  | -0.846324 | -0.875458 |
| 23 | 0.298403  | 1.687479  | 0.186798  |
| 6  | -1.761068 | 0.967398  | 0.643562  |
| 6  | -0.390563 | -1.859227 | -0.428376 |
| 6  | 1.101518  | -0.057775 | 1.382991  |
| 6  | 0.656328  | 0.634185  | -1.644172 |
| 8  | 0.117784  | -2.513379 | -1.376505 |
| 8  | 2.051005  | -0.015227 | 2.158125  |
| 8  | -2.489816 | 1.465128  | 1.492485  |
| 8  | -0.011577 | 1.737939  | -1.839695 |

---

**Table S24.** Theoretical cartesian coordinates (in Å) for the structure of  $\text{Cp}_4\text{V}_4(\text{CO})_4$  **4T-2** using the BP86 method.

| Atomic Number | Standard orientation:   |           |           |
|---------------|-------------------------|-----------|-----------|
|               | Coordinates (Angstroms) |           |           |
|               | X                       | Y         | Z         |
| 23            | -0.051158               | -1.359104 | 0.444823  |
| 23            | -2.007485               | -0.150380 | -0.682669 |
| 23            | 1.863761                | -0.287665 | -0.606387 |
| 23            | 0.240175                | 1.283989  | 0.677108  |
| 6             | -3.467358               | 1.502724  | -1.444123 |
| 6             | -3.851371               | 0.255981  | -2.035035 |
| 1             | -3.815056               | 0.014535  | -3.101061 |
| 6             | -4.227106               | -0.637951 | -0.983574 |
| 1             | -4.572122               | -1.667521 | -1.102068 |
| 6             | -3.590202               | 1.378906  | -0.021616 |
| 1             | -3.384958               | 2.156516  | 0.716372  |
| 6             | -4.066577               | 0.057674  | 0.266804  |
| 1             | -4.239840               | -0.360121 | 1.262012  |
| 1             | -3.105841               | 2.375413  | -1.994971 |
| 6             | 1.545192                | -2.960373 | -0.153946 |
| 6             | 0.358873                | -3.623758 | 0.298184  |
| 1             | -0.282612               | -4.267481 | -0.307101 |
| 6             | 0.146228                | -3.294550 | 1.682524  |
| 1             | -0.687364               | -3.645710 | 2.296006  |
| 6             | 2.039290                | -2.163020 | 0.945626  |
| 1             | 3.014281                | -1.658519 | 1.006257  |
| 6             | 1.163873                | -2.380078 | 2.082579  |
| 1             | 1.281403                | -1.913907 | 3.063649  |
| 1             | 2.022525                | -3.106646 | -1.126403 |

|   |           |           |           |
|---|-----------|-----------|-----------|
| 6 | 0.610784  | 3.325157  | -0.352205 |
| 6 | -0.770115 | 3.243038  | 0.015780  |
| 1 | -1.612390 | 3.268408  | -0.675767 |
| 6 | -0.845341 | 3.151952  | 1.448921  |
| 1 | -1.754527 | 3.076895  | 2.050509  |
| 6 | 1.387048  | 3.286039  | 0.848826  |
| 1 | 2.476102  | 3.330770  | 0.924064  |
| 6 | 0.486648  | 3.184796  | 1.964353  |
| 1 | 0.773778  | 3.119696  | 3.016609  |
| 1 | 0.993717  | 3.400156  | -1.372460 |
| 6 | 2.771287  | -0.403420 | -2.724783 |
| 6 | 3.742287  | -0.881609 | -1.787623 |
| 1 | 4.142611  | -1.899222 | -1.736183 |
| 6 | 4.100053  | 0.204828  | -0.915330 |
| 1 | 4.821011  | 0.165000  | -0.093660 |
| 6 | 2.524125  | 0.979115  | -2.434406 |
| 1 | 1.815942  | 1.618409  | -2.966760 |
| 6 | 3.348974  | 1.355856  | -1.324887 |
| 1 | 3.407850  | 2.348949  | -0.876332 |
| 1 | 2.277351  | -0.988758 | -3.505519 |
| 6 | 0.064422  | -0.059623 | -1.199226 |
| 8 | -0.779776 | 0.273042  | -2.143698 |
| 6 | 1.735197  | 0.637147  | 1.646026  |
| 8 | 2.638295  | 0.427833  | 2.410615  |
| 6 | -2.043574 | -2.017392 | -0.237499 |
| 8 | -2.568458 | -3.094125 | -0.070800 |
| 6 | -0.904138 | 0.271478  | 1.841107  |
| 8 | -1.560637 | -0.111961 | 2.779863  |

---

**Table S25.** Theoretical cartesian coordinates (in Å) for the structure of  $\text{Cp}_4\text{V}_4(\text{CO})_4$  **4T-3** using the BP86 method.

| Atomic Number | Standard orientation:   |           |           |
|---------------|-------------------------|-----------|-----------|
|               | Coordinates (Angstroms) |           |           |
|               | X                       | Y         | Z         |
| 6             | -3.353992               | 0.408300  | -1.699930 |
| 6             | -2.655158               | 1.144897  | -2.716408 |
| 1             | -2.691157               | 2.226389  | -2.868920 |
| 6             | -1.908593               | 0.202229  | -3.492587 |
| 1             | -1.230819               | 0.449996  | -4.312948 |
| 6             | -3.021017               | -0.975251 | -1.844354 |
| 1             | -3.379650               | -1.796823 | -1.220295 |
| 6             | -2.120665               | -1.107429 | -2.953910 |
| 1             | -1.663804               | -2.036245 | -3.303723 |
| 1             | -4.015259               | 0.838740  | -0.944888 |
| 6             | -2.120666               | 1.107422  | 2.953913  |
| 6             | -3.021019               | 0.975241  | 1.844357  |
| 1             | -3.379655               | 1.796813  | 1.220300  |
| 6             | -3.353988               | -0.408310 | 1.699932  |
| 1             | -4.015255               | -0.838751 | 0.944890  |
| 6             | -1.908588               | -0.202236 | 3.492588  |
| 1             | -1.230813               | -0.450000 | 4.312949  |
| 6             | -2.655151               | -1.144906 | 2.716409  |
| 1             | -2.691146               | -2.226398 | 2.868920  |
| 1             | -1.663808               | 2.036239  | 3.303725  |
| 6             | 3.035748                | -1.837096 | 0.901981  |
| 6             | 2.164717                | -2.937890 | 1.196340  |
| 1             | 1.733550                | -3.170098 | 2.172873  |
| 6             | 1.913844                | -3.630466 | -0.030510 |

|    |           |           |           |
|----|-----------|-----------|-----------|
| 1  | 1.235121  | -4.477410 | -0.157578 |
| 6  | 3.328795  | -1.860438 | -0.501778 |
| 1  | 3.968729  | -1.157133 | -1.039742 |
| 6  | 2.625026  | -2.967175 | -1.083573 |
| 1  | 2.618857  | -3.242048 | -2.141917 |
| 1  | 3.414102  | -1.114826 | 1.628152  |
| 6  | 2.625014  | 2.967186  | 1.083571  |
| 6  | 3.328786  | 1.860452  | 0.501776  |
| 1  | 3.968724  | 1.157151  | 1.039740  |
| 6  | 3.035740  | 1.837109  | -0.901983 |
| 1  | 3.414097  | 1.114841  | -1.628155 |
| 6  | 1.913828  | 3.630473  | 0.030508  |
| 1  | 1.235101  | 4.477414  | 0.157576  |
| 6  | 2.164703  | 2.937898  | -1.196342 |
| 1  | 1.733535  | 3.170105  | -2.172875 |
| 1  | 2.618844  | 3.242060  | 2.141914  |
| 23 | -1.065283 | -0.190747 | 1.325538  |
| 23 | -1.065286 | 0.190744  | -1.325537 |
| 23 | 1.060947  | 1.485708  | 0.258858  |
| 23 | 1.060955  | -1.485705 | -0.258859 |
| 6  | -0.965731 | -1.653310 | 0.220998  |
| 6  | -0.965741 | 1.653305  | -0.220997 |
| 6  | 0.974556  | -0.218458 | -1.621346 |
| 6  | 0.974556  | 0.218460  | 1.621345  |
| 8  | -0.737027 | 2.702926  | 0.439824  |
| 8  | 0.737644  | 0.491551  | -2.620650 |
| 8  | -0.737012 | -2.702930 | -0.439822 |
| 8  | 0.737649  | -0.491550 | 2.620650  |

---

**Table S26.** Theoretical cartesian coordinates (in Å) for the structure of  $\text{Cp}_4\text{V}_4(\text{CO})_4$  **4T-4** using the BP86 method.

| Atomic Number | Standard orientation:   |           |           |
|---------------|-------------------------|-----------|-----------|
|               | Coordinates (Angstroms) |           |           |
|               | X                       | Y         | Z         |
| 23            | 0.181742                | -0.871792 | 1.251134  |
| 23            | 1.678973                | 0.340750  | -0.354366 |
| 23            | -1.070855               | 1.205020  | 0.153597  |
| 23            | -0.875197               | -0.956518 | -0.980862 |
| 6             | -1.439636               | -2.162226 | -2.472398 |
| 6             | 0.141937                | -1.632110 | 3.114555  |
| 6             | -2.334777               | 2.721421  | 0.105629  |
| 6             | 3.567895                | 0.839313  | -0.747450 |
| 8             | -1.836688               | -2.838921 | -3.352957 |
| 8             | 0.120601                | -2.117787 | 4.187018  |
| 8             | 4.687982                | 1.118826  | -0.982938 |
| 8             | -3.088497               | 3.628014  | 0.108283  |
| 6             | 1.293301                | -2.127471 | -1.318451 |
| 6             | 2.536977                | -1.573567 | -0.790123 |
| 1             | 3.479058                | -1.624633 | -1.349022 |
| 6             | 2.440753                | -1.733705 | 0.666674  |
| 1             | 3.283051                | -1.559395 | 1.345265  |
| 6             | 0.546671                | -2.745438 | -0.224971 |
| 1             | -0.192020               | -3.540123 | -0.375484 |
| 6             | 1.345541                | -2.636296 | 0.996917  |
| 1             | 1.355503                | -3.382731 | 1.797165  |
| 1             | 1.177209                | -2.395451 | -2.371342 |
| 6             | 0.087157                | 1.255364  | 2.330797  |
| 6             | -0.146520               | 2.577042  | 1.743946  |

|   |           |           |           |
|---|-----------|-----------|-----------|
| 1 | -0.894862 | 3.292020  | 2.096229  |
| 6 | 1.029874  | 2.937264  | 1.029861  |
| 1 | 1.167079  | 3.890995  | 0.508863  |
| 6 | 1.483291  | 0.864470  | 2.021675  |
| 1 | 2.106346  | 0.331213  | 2.750557  |
| 6 | 2.057077  | 1.944678  | 1.199135  |
| 1 | 3.116232  | 2.220593  | 1.217133  |
| 1 | -0.428590 | 0.974887  | 3.253260  |
| 6 | -3.016438 | -0.105712 | -0.247261 |
| 6 | -2.758878 | -1.554560 | -0.260072 |
| 1 | -3.355598 | -2.291877 | -0.806896 |
| 6 | -2.073617 | -1.825580 | 0.998565  |
| 1 | -1.881764 | -2.835680 | 1.376140  |
| 6 | -2.825898 | 0.420007  | 1.119952  |
| 1 | -3.539127 | 1.095559  | 1.608165  |
| 6 | -2.153884 | -0.655150 | 1.853594  |
| 1 | -2.158200 | -0.707149 | 2.946010  |
| 1 | -3.706129 | 0.359148  | -0.959986 |
| 6 | 1.231116  | 0.860824  | -2.625372 |
| 6 | 1.000729  | 2.058064  | -1.906897 |
| 1 | 1.740797  | 2.851751  | -1.766298 |
| 6 | -0.444508 | 2.233940  | -1.680010 |
| 1 | -0.888632 | 3.228459  | -1.816219 |
| 6 | -0.046570 | 0.199968  | -2.863131 |
| 1 | -0.206601 | -0.439516 | -3.736748 |
| 6 | -1.079455 | 1.024076  | -2.252371 |
| 1 | -2.103384 | 1.026670  | -2.640839 |
| 1 | 2.172387  | 0.574949  | -3.106535 |

---

**Table S27.** Theoretical cartesian coordinates (in Å) for the structure of  $\text{Cp}_4\text{V}_4(\text{CO})_4$  **4Q-1** using the BP86 method.

Standard orientation:

| Atomic Number | Coordinates (Angstroms) |           |           |
|---------------|-------------------------|-----------|-----------|
|               | X                       | Y         | Z         |
| 23            | -1.523915               | -1.142916 | -0.272777 |
| 23            | -0.430379               | 1.604586  | -0.476246 |
| 23            | 1.190850                | -0.479020 | -1.157761 |
| 23            | 0.794489                | -0.272767 | 1.375385  |
| 6             | 0.085274                | 3.829600  | -0.014225 |
| 6             | -0.009816               | 3.634073  | -1.433539 |
| 1             | 0.807178                | 3.742030  | -2.152049 |
| 6             | -1.361158               | 3.255022  | -1.738691 |
| 1             | -1.756792               | 3.030208  | -2.732277 |
| 6             | -1.194043               | 3.555318  | 0.557322  |
| 1             | -1.443095               | 3.573256  | 1.620789  |
| 6             | -2.090783               | 3.192578  | -0.504434 |
| 1             | -3.142519               | 2.916411  | -0.392156 |
| 1             | 0.996810                | 4.087033  | 0.529948  |
| 6             | 2.567843                | -0.879142 | 2.685686  |
| 6             | 2.345914                | 0.519051  | 2.902547  |
| 1             | 3.022810                | 1.326382  | 2.612883  |
| 6             | 1.044374                | 0.678207  | 3.473100  |
| 1             | 0.560945                | 1.625364  | 3.724624  |
| 6             | 1.403784                | -1.592023 | 3.146379  |
| 1             | 1.263208                | -2.675614 | 3.127549  |
| 6             | 0.464440                | -0.628007 | 3.630178  |
| 1             | -0.535796               | -0.840900 | 4.015224  |
| 1             | 3.462770                | -1.329312 | 2.246594  |



|   |           |           |           |
|---|-----------|-----------|-----------|
| 6 | -3.639944 | -0.944428 | -1.159930 |
| 6 | -3.674843 | -0.442888 | 0.178663  |
| 1 | -3.886854 | 0.584186  | 0.481285  |
| 6 | -3.362512 | -1.525517 | 1.073877  |
| 1 | -3.291875 | -1.452502 | 2.161632  |
| 6 | -3.288601 | -2.335629 | -1.101221 |
| 1 | -3.134089 | -2.999208 | -1.956411 |
| 6 | -3.138844 | -2.692093 | 0.280718  |
| 1 | -2.819741 | -3.668982 | 0.653440  |
| 1 | -3.800546 | -0.360776 | -2.070666 |
| 6 | 2.102810  | -2.064405 | -2.561628 |
| 6 | 2.302990  | -0.746281 | -3.108510 |
| 1 | 1.850646  | -0.359628 | -4.026029 |
| 6 | 3.151402  | -0.021180 | -2.212709 |
| 1 | 3.483839  | 1.013947  | -2.320160 |
| 6 | 2.832365  | -2.150975 | -1.337925 |
| 1 | 2.846847  | -3.010661 | -0.663139 |
| 6 | 3.467024  | -0.888711 | -1.107210 |
| 1 | 4.077048  | -0.616224 | -0.243523 |
| 1 | 1.464343  | -2.844024 | -2.984854 |
| 6 | -0.674045 | 0.243673  | -1.701544 |
| 8 | -0.644917 | -0.968055 | -2.181716 |
| 6 | -1.115473 | 0.642857  | 1.277541  |
| 8 | -1.886663 | 0.984503  | 2.159353  |
| 6 | 1.662412  | 1.159994  | -0.118965 |
| 8 | 2.556586  | 1.962176  | 0.131709  |
| 6 | 0.327628  | -1.821028 | 0.468760  |
| 8 | -0.273550 | -2.845710 | 0.033658  |

---

**Table S28.** Theoretical cartesian coordinates (in Å) for the structure of  $\text{Cp}_4\text{V}_4(\text{CO})_4$  **4Q-2** using the BP86 method.

| Standard orientation: |                         |           |           |
|-----------------------|-------------------------|-----------|-----------|
| Atomic Number         | Coordinates (Angstroms) |           |           |
|                       | X                       | Y         | Z         |
| 23                    | 1.048811                | 1.049647  | -0.686028 |
| 6                     | 1.233107                | 3.021874  | -1.865223 |
| 6                     | 2.010271                | 3.130660  | -0.666672 |
| 6                     | 3.055864                | 2.144329  | -0.724813 |
| 6                     | 2.917019                | 1.432308  | -1.960890 |
| 6                     | 1.790371                | 1.969734  | -2.664814 |
| 1                     | 0.340563                | 3.600943  | -2.113275 |
| 1                     | 1.833058                | 3.823733  | 0.159335  |
| 1                     | 3.815832                | 1.972252  | 0.041511  |
| 1                     | 3.526744                | 0.588213  | -2.293733 |
| 23                    | 1.154644                | -0.952017 | 0.696693  |
| 6                     | 2.482592                | -2.821424 | 0.868196  |
| 6                     | 3.344183                | -1.670714 | 0.787006  |
| 6                     | 3.098453                | -0.854329 | 1.935116  |
| 6                     | 2.083109                | -1.490604 | 2.726638  |
| 6                     | 1.713589                | -2.710941 | 2.070177  |
| 1                     | 2.418638                | -3.624886 | 0.130215  |
| 1                     | 4.043839                | -1.455283 | -0.024114 |
| 1                     | 3.559917                | 0.111001  | 2.157214  |
| 1                     | 1.649577                | -1.099634 | 3.650957  |
| 23                    | -1.226673               | 0.868164  | 0.711386  |
| 6                     | -1.789412               | 2.848897  | 1.787763  |
| 6                     | -2.076753               | 1.761386  | 2.676023  |
| 6                     | -3.080405               | 0.944190  | 2.060081  |

|    |           |           |           |
|----|-----------|-----------|-----------|
| 6  | -3.413629 | 1.522887  | 0.790159  |
| 6  | -2.609781 | 2.702475  | 0.622293  |
| 1  | -1.037742 | 3.624323  | 1.955208  |
| 1  | -1.586750 | 1.567584  | 3.633763  |
| 1  | -3.480613 | 0.013900  | 2.472256  |
| 1  | -4.140122 | 1.135781  | 0.070983  |
| 23 | -0.954840 | -1.114359 | -0.683474 |
| 6  | -1.724392 | -1.758224 | -2.743660 |
| 6  | -2.845002 | -1.248693 | -2.004399 |
| 6  | -3.044530 | -2.084688 | -0.862778 |
| 6  | -2.046305 | -3.121969 | -0.892209 |
| 6  | -1.240145 | -2.922304 | -2.058571 |
| 1  | -1.303542 | -1.323627 | -3.653727 |
| 1  | -3.405894 | -0.345048 | -2.255161 |
| 1  | -3.806419 | -1.957301 | -0.089428 |
| 1  | -1.922862 | -3.912119 | -0.147220 |
| 6  | 0.817709  | 1.257282  | 1.292324  |
| 8  | 1.221798  | 1.771872  | 2.322721  |
| 6  | 1.215322  | -1.152981 | -1.238975 |
| 8  | 1.670552  | -1.573778 | -2.286817 |
| 6  | -0.946396 | 1.058716  | -1.328237 |
| 8  | -1.519238 | 1.551986  | -2.290636 |
| 6  | -1.018098 | -1.384489 | 1.220286  |
| 8  | -1.363493 | -1.849526 | 2.291520  |
| 1  | 0.931704  | -3.398392 | 2.402677  |
| 1  | -0.368176 | -3.513279 | -2.350486 |
| 1  | 1.397356  | 1.612799  | -3.620318 |
| 1  | -2.607200 | 3.351305  | -0.257161 |

---

**Table S29.** Theoretical cartesian coordinates (in Å) for the structure of  $\text{Cp}_4\text{V}_4(\text{CO})_4$  **4Q-3** using the BP86 method.

| Atomic Number | Standard orientation:   |           |           |
|---------------|-------------------------|-----------|-----------|
|               | Coordinates (Angstroms) |           |           |
|               | X                       | Y         | Z         |
| 23            | -0.513917               | 1.152721  | -0.996990 |
| 23            | -1.448045               | -0.247453 | 0.862547  |
| 23            | 1.448045                | 0.247453  | 0.862547  |
| 23            | 0.513917                | -1.152721 | -0.996990 |
| 6             | 0.697227                | -2.793829 | -2.109920 |
| 6             | -0.697227               | 2.793829  | -2.109920 |
| 6             | 3.074660                | 0.452788  | 1.983687  |
| 6             | -3.074660               | -0.452788 | 1.983687  |
| 8             | 0.872840                | -3.750870 | -2.777467 |
| 8             | -0.872840               | 3.750870  | -2.777467 |
| 8             | -4.058184               | -0.596633 | 2.618149  |
| 8             | 4.058184                | 0.596633  | 2.618149  |
| 6             | -1.880896               | -1.567841 | -1.340937 |
| 6             | -2.909952               | -0.909914 | -0.542325 |
| 1             | -3.827388               | -1.421327 | -0.226563 |
| 6             | -2.852069               | 0.504059  | -0.954771 |
| 1             | -3.615627               | 1.231039  | -0.655629 |
| 6             | -1.388072               | -0.632201 | -2.358581 |
| 1             | -0.950994               | -0.953530 | -3.310464 |
| 6             | -2.126605               | 0.623572  | -2.225333 |
| 1             | -2.434017               | 1.250375  | -3.069006 |
| 1             | -1.837957               | -2.655496 | -1.440315 |
| 6             | -0.113978               | 2.852271  | 0.658254  |
| 6             | 0.872840                | 2.407319  | 1.630692  |

|   |           |           |           |
|---|-----------|-----------|-----------|
| 1 | 1.874208  | 2.836121  | 1.738829  |
| 6 | 0.215083  | 1.597137  | 2.595974  |
| 1 | 0.659661  | 1.241236  | 3.530597  |
| 6 | -1.379437 | 2.277140  | 1.043043  |
| 1 | -2.344637 | 2.661282  | 0.699309  |
| 6 | -1.204852 | 1.528276  | 2.282256  |
| 1 | -1.966391 | 1.464309  | 3.065638  |
| 1 | 0.005049  | 3.760782  | 0.062114  |
| 6 | 2.852069  | -0.504059 | -0.954771 |
| 6 | 2.126605  | -0.623572 | -2.225333 |
| 1 | 2.434017  | -1.250375 | -3.069006 |
| 6 | 1.388072  | 0.632201  | -2.358581 |
| 1 | 0.950994  | 0.953530  | -3.310464 |
| 6 | 2.909952  | 0.909914  | -0.542325 |
| 1 | 3.827388  | 1.421327  | -0.226563 |
| 6 | 1.880896  | 1.567841  | -1.340937 |
| 1 | 1.837957  | 2.655496  | -1.440315 |
| 1 | 3.615627  | -1.231039 | -0.655629 |
| 6 | -0.872840 | -2.407319 | 1.630692  |
| 6 | -0.215083 | -1.597137 | 2.595974  |
| 1 | -0.659661 | -1.241236 | 3.530597  |
| 6 | 1.204852  | -1.528276 | 2.282256  |
| 1 | 1.966391  | -1.464309 | 3.065638  |
| 6 | 0.113978  | -2.852271 | 0.658254  |
| 1 | -0.005049 | -3.760782 | 0.062114  |
| 6 | 1.379437  | -2.277140 | 1.043043  |
| 1 | 2.344637  | -2.661282 | 0.699309  |
| 1 | -1.874208 | -2.836121 | 1.738829  |

---

**Table S30.** Theoretical cartesian coordinates (in Å) for the structure of  $\text{Cp}_3\text{V}_3(\text{CO})_9$  **9S-1** using the BP86 method.

Standard orientation:

| Atomic Number | Coordinates (Angstroms) |           |           |
|---------------|-------------------------|-----------|-----------|
|               | X                       | Y         | Z         |
| 6             | -0.324891               | 1.579705  | 1.873078  |
| 8             | -0.492148               | 1.649100  | 3.034528  |
| 6             | 0.960278                | 1.234687  | -1.584981 |
| 8             | 1.462848                | 1.252817  | -2.660697 |
| 6             | 1.530510                | -0.508489 | 1.873078  |
| 8             | 1.674237                | -0.398337 | 3.034528  |
| 6             | 0.589131                | -1.448969 | -1.584981 |
| 8             | 0.353547                | -1.893272 | -2.660697 |
| 6             | -1.549409               | 0.214282  | -1.584981 |
| 8             | -1.816395               | 0.640455  | -2.660697 |
| 6             | -1.205619               | -1.071216 | 1.873078  |
| 8             | -1.182089               | -1.250763 | 3.034528  |
| 6             | -2.858246               | 0.383801  | 0.647958  |
| 8             | -3.676289               | 1.123675  | 1.075523  |
| 6             | 1.761505                | 2.283413  | 0.647958  |
| 8             | 2.811276                | 2.621922  | 1.075523  |
| 6             | 1.096741                | -2.667214 | 0.647958  |
| 8             | 0.865013                | -3.745597 | 1.075523  |
| 6             | -3.614830               | -1.776737 | -0.889429 |
| 6             | -2.541931               | -2.340812 | -1.661862 |
| 6             | -3.486100               | -2.259283 | 0.460580  |
| 1             | -4.396447               | -1.112587 | -1.266331 |
| 6             | -1.768249               | -3.177037 | -0.799171 |
| 1             | -2.349717               | -2.170536 | -2.723423 |

|    |           |           |           |
|----|-----------|-----------|-----------|
| 6  | -2.334426 | -3.120943 | 0.511598  |
| 1  | -4.153704 | -2.032358 | 1.295588  |
| 1  | -0.883278 | -3.746970 | -1.086676 |
| 1  | -1.967188 | -3.660745 | 1.387583  |
| 6  | 3.346114  | -2.242166 | -0.889429 |
| 6  | 3.298168  | -1.030971 | -1.661862 |
| 6  | 3.699646  | -1.889410 | 0.460580  |
| 1  | 3.161752  | -3.251141 | -1.266331 |
| 6  | 3.635519  | 0.057170  | -0.799171 |
| 1  | 3.054598  | -0.949647 | -2.723423 |
| 6  | 3.870029  | -0.461201 | 0.511598  |
| 1  | 3.836926  | -2.581034 | 1.295588  |
| 1  | 3.686610  | 1.108544  | -1.086676 |
| 1  | 4.153892  | 0.126738  | 1.387583  |
| 6  | 0.268716  | 4.018903  | -0.889429 |
| 6  | -0.756237 | 3.371783  | -1.661862 |
| 6  | -0.213546 | 4.148693  | 0.460580  |
| 1  | 1.234695  | 4.363728  | -1.266331 |
| 6  | -1.867270 | 3.119867  | -0.799171 |
| 1  | -0.704881 | 3.120183  | -2.723423 |
| 6  | -1.535603 | 3.582144  | 0.511598  |
| 1  | 0.316778  | 4.613392  | 1.295588  |
| 1  | -2.803332 | 2.638426  | -1.086676 |
| 1  | -2.186704 | 3.534007  | 1.387583  |
| 23 | 0.000000  | 1.949093  | -0.023835 |
| 23 | 1.687964  | -0.974547 | -0.023835 |
| 23 | -1.687964 | -0.974547 | -0.023835 |

---

**Table S31.** Theoretical cartesian coordinates (in Å) for the structure of  $\text{Cp}_3\text{V}_3(\text{CO})_9$  **9S-2** using the BP86 method.

Standard orientation:

| Atomic Number | Coordinates (Angstroms) |           |           |
|---------------|-------------------------|-----------|-----------|
|               | X                       | Y         | Z         |
| 6             | -1.159920               | 0.272073  | -1.523628 |
| 6             | -1.152607               | 0.301389  | 1.526681  |
| 6             | 2.213617                | -2.240500 | 0.012458  |
| 6             | -0.547929               | -2.323735 | 1.332632  |
| 6             | -0.546185               | -2.358373 | -1.310526 |
| 6             | 1.503931                | -0.628077 | -1.871578 |
| 6             | 1.515585                | -0.602307 | 1.876253  |
| 6             | 0.592336                | 2.053257  | -1.353338 |
| 6             | 0.602154                | 2.081977  | 1.347210  |
| 8             | -1.434637               | 0.322954  | -2.689822 |
| 8             | -1.429829               | 0.322353  | 2.693131  |
| 8             | 2.428857                | -3.398125 | 0.021591  |
| 8             | -0.193163               | -3.114998 | 2.130016  |
| 8             | -0.181528               | -3.167699 | -2.084955 |
| 8             | 1.432409                | -0.809160 | -3.028540 |
| 8             | 1.448113                | -0.769156 | 3.035440  |
| 8             | 1.236171                | 2.495411  | -2.244621 |
| 8             | 1.263425                | 2.528621  | 2.223045  |
| 6             | 3.675300                | 0.825691  | 1.144287  |
| 6             | 4.187929                | -0.448875 | 0.709579  |
| 6             | 3.370142                | 1.600951  | -0.016149 |
| 1             | 3.560248                | 1.159947  | 2.177975  |
| 6             | 4.181839                | -0.456068 | -0.728178 |
| 1             | 4.536974                | -1.255607 | 1.358803  |



|    |           |           |           |
|----|-----------|-----------|-----------|
| 6  | 3.665279  | 0.814014  | -1.171337 |
| 1  | 2.965913  | 2.614212  | -0.019368 |
| 1  | 4.525189  | -1.269497 | -1.372046 |
| 1  | 3.541059  | 1.137831  | -2.207273 |
| 6  | -1.634483 | 3.512362  | 1.106405  |
| 6  | -1.054839 | 3.954350  | -0.133024 |
| 6  | -2.713513 | 2.627091  | 0.799697  |
| 1  | -1.315007 | 3.804672  | 2.109433  |
| 6  | -1.786324 | 3.333269  | -1.206113 |
| 1  | -0.221371 | 4.652581  | -0.240646 |
| 6  | -2.806635 | 2.516197  | -0.625447 |
| 1  | -3.350463 | 2.133687  | 1.536563  |
| 1  | -1.599136 | 3.458036  | -2.275161 |
| 1  | -3.538386 | 1.928718  | -1.182325 |
| 6  | -3.176943 | -2.160782 | 1.188639  |
| 6  | -3.642408 | -0.914896 | 0.668421  |
| 6  | -2.868787 | -3.018128 | 0.070012  |
| 1  | -3.082897 | -2.415681 | 2.246467  |
| 6  | -3.630616 | -0.992562 | -0.763605 |
| 1  | -3.955026 | -0.058850 | 1.268248  |
| 6  | -3.157454 | -2.285643 | -1.137519 |
| 1  | -2.512276 | -4.049092 | 0.127031  |
| 1  | -3.928874 | -0.209041 | -1.461870 |
| 1  | -3.048839 | -2.653205 | -2.160237 |
| 23 | 2.047698  | -0.330284 | -0.001273 |
| 23 | -1.447418 | -1.249708 | -0.003776 |
| 23 | -0.726909 | 1.708845  | 0.005098  |

---

**Table S32.** Theoretical cartesian coordinates (in Å) for the structure of  $\text{Cp}_3\text{V}_3(\text{CO})_9$  **9S-3** using the BP86 method.

Standard orientation:

| Atomic Number | Coordinates (Angstroms) |           |           |
|---------------|-------------------------|-----------|-----------|
|               | X                       | Y         | Z         |
| 6             | 1.481823                | -0.639706 | 0.000000  |
| 6             | -1.368846               | -1.698665 | 0.000000  |
| 6             | -1.006131               | 2.755818  | 1.371235  |
| 6             | -1.662685               | -0.500659 | 2.221793  |
| 6             | 0.629592                | 0.519490  | 2.469702  |
| 6             | -1.006131               | 2.755818  | -1.371235 |
| 6             | -1.705624               | 1.024175  | 0.000000  |
| 6             | 0.629592                | 0.519490  | -2.469702 |
| 6             | -1.662685               | -0.500659 | -2.221793 |
| 8             | 2.688727                | -0.583328 | 0.000000  |
| 8             | -2.369668               | -2.352526 | 0.000000  |
| 8             | -1.669716               | 3.294185  | 2.179869  |
| 8             | -2.672500               | -0.255595 | 2.774033  |
| 8             | 0.988347                | 1.246122  | 3.337203  |
| 8             | -1.669716               | 3.294185  | -2.179869 |
| 8             | -2.879532               | 0.885293  | 0.000000  |
| 8             | 0.988347                | 1.246122  | -3.337203 |
| 8             | -2.672500               | -0.255595 | -2.774033 |
| 6             | -0.519479               | -2.824388 | -2.899746 |
| 6             | 0.361793                | -1.933994 | -3.606098 |
| 6             | 0.206014                | -3.371797 | -1.797576 |
| 1             | -1.555959               | -3.051948 | -3.159803 |
| 6             | 1.633847                | -1.939032 | -2.928430 |
| 1             | 0.114724                | -1.365848 | -4.505919 |

|    |           |           |           |
|----|-----------|-----------|-----------|
| 6  | 1.532877  | -2.829856 | -1.817084 |
| 1  | -0.190354 | -4.091610 | -1.079492 |
| 1  | 2.524244  | -1.377749 | -3.220266 |
| 1  | 2.337234  | -3.055924 | -1.115861 |
| 6  | -0.519479 | -2.824388 | 2.899746  |
| 6  | 0.206014  | -3.371797 | 1.797576  |
| 6  | 0.361793  | -1.933994 | 3.606098  |
| 1  | -1.555959 | -3.051948 | 3.159803  |
| 6  | 1.532877  | -2.829856 | 1.817084  |
| 1  | -0.190354 | -4.091610 | 1.079492  |
| 6  | 1.633847  | -1.939032 | 2.928430  |
| 1  | 0.114724  | -1.365848 | 4.505919  |
| 1  | 2.337234  | -3.055924 | 1.115861  |
| 1  | 2.524244  | -1.377749 | 3.220266  |
| 6  | 2.282235  | 2.264672  | -0.714282 |
| 6  | 1.483088  | 3.362989  | -1.163360 |
| 6  | 2.282235  | 2.264672  | 0.714282  |
| 1  | 2.809735  | 1.549399  | -1.345403 |
| 6  | 0.982782  | 4.055232  | 0.000000  |
| 1  | 1.310285  | 3.639195  | -2.205585 |
| 6  | 1.483088  | 3.362989  | 1.163360  |
| 1  | 2.809735  | 1.549399  | 1.345403  |
| 1  | 0.368634  | 4.958932  | 0.000000  |
| 1  | 1.310285  | 3.639195  | 2.205585  |
| 23 | 0.040333  | -1.068569 | -1.528849 |
| 23 | 0.040333  | -1.068569 | 1.528849  |
| 23 | 0.069013  | 1.959486  | 0.000000  |

---

**Table S33.** Theoretical harmonic vibrational frequencies (in  $\text{cm}^{-1}$ ) for the five singlet structures of  $\text{Cp}_4\text{V}_4(\text{CO})_4$  by the BP86 method (infrared intensities in parentheses are in  $\text{km/mol}$ ).

| 4S-1            | 4S-2            | 4S-3            | 4S-4                         | 4S-5            |
|-----------------|-----------------|-----------------|------------------------------|-----------------|
| 51.1 (e, 0.0)   | 39.8 (a, 0.1)   | 26.6 (a, 0.1)   | 9.0 (b <sub>1</sub> , 0.0)   | 41.7 (a, 0.0)   |
| 51.1 (e, 0.0)   | 44.2 (a, 0.1)   | 36.2 (a, 0.5)   | 16.0 (e, 0.0)                | 48.6 (b, 0.0)   |
| 54.8 (b, 0.1)   | 56.4 (a, 0.8)   | 42.8 (a, 0.3)   | 16.0 (e, 0.0)                | 52.0 (a, 0.0)   |
| 75.3 (a, 0.0)   | 58.3 (a, 0.4)   | 45.9 (a, 0.1)   | 16.8 (a <sub>2</sub> , 0.0)  | 56.7 (a, 0.0)   |
| 83.8 (b, 0.0)   | 69.7 (a, 0.4)   | 56.2 (a, 0.4)   | 47.2 (b <sub>1</sub> , 0.0)  | 61.7 (b, 0.0)   |
| 84.7 (e, 1.0)   | 74.4 (a, 0.1)   | 61.4 (a, 0.4)   | 59.5 (a <sub>1</sub> , 0.0)  | 62.4 (a, 0.0)   |
| 84.7 (e, 1.0)   | 85.2 (a, 0.5)   | 66.1 (a, 0.0)   | 76.9 (e, 1.5)                | 75.4 (a, 1.1)   |
| 89.5 (a, 0.0)   | 95.3 (a, 0.5)   | 74.2 (a, 2.2)   | 76.9 (e, 1.5)                | 79.3 (b, 0.5)   |
| 116.4 (a, 0.0)  | 107.1 (a, 0.1)  | 80.1 (a, 0.2)   | 84.9 (b <sub>2</sub> , 0.1)  | 85.8 (b, 0.1)   |
| 119.1 (b, 0.2)  | 112.2 (a, 0.2)  | 89.0 (a, 1.3)   | 105.2 (a <sub>2</sub> , 0.0) | 118.8 (a, 0.4)  |
| 147.4 (e, 1.0)  | 112.5 (a, 0.4)  | 111.6 (a, 3.7)  | 110.8 (e, 1.9)               | 123.8 (b, 1.2)  |
| 147.4 (e, 1.0)  | 121.7 (a, 0.5)  | 121.4 (a, 1.2)  | 110.8 (e, 1.9)               | 132.1 (b, 0.2)  |
| 157.1 (e, 0.1)  | 127.0 (a, 0.2)  | 125.1 (a, 0.3)  | 129.6 (b <sub>1</sub> , 0.0) | 133.1 (a, 2.6)  |
| 157.1 (e, 0.1)  | 135.3 (a, 0.1)  | 127.7 (a, 1.3)  | 141.6 (e, 1.0)               | 140.0 (b, 1.3)  |
| 163.3 (b, 0.0)  | 147.5 (a, 0.6)  | 131.3 (a, 1.5)  | 141.6 (e, 1.0)               | 149.0 (a, 0.0)  |
| 168.0 (a, 0.0)  | 149.2 (a, 0.2)  | 149.9 (a, 1.1)  | 171.0 (a <sub>1</sub> , 0.0) | 171.5 (a, 0.3)  |
| 180.1 (b, 0.3)  | 159.2 (a, 0.2)  | 154.7 (a, 0.6)  | 187.7 (e, 3.0)               | 190.3 (a, 0.1)  |
| 198.0 (a, 0.0)  | 169.0 (a, 0.2)  | 157.2 (a, 0.0)  | 187.7 (e, 3.0)               | 194.0 (b, 4.6)  |
| 199.5 (e, 3.1)  | 174.7 (a, 0.5)  | 164.7 (a, 1.6)  | 190.5 (a <sub>2</sub> , 0.0) | 196.4 (b, 2.4)  |
| 199.5 (e, 3.1)  | 184.3 (a, 2.5)  | 171.2 (a, 5.4)  | 192.2 (a <sub>1</sub> , 0.0) | 198.2 (a, 3.1)  |
| 218.7 (a, 0.0)  | 194.5 (a, 1.0)  | 185.4 (a, 0.8)  | 195.7 (b <sub>2</sub> , 7.2) | 201.0 (b, 2.0)  |
| 219.4 (b, 2.5)  | 202.2 (a, 1.1)  | 189.6 (a, 0.9)  | 209.8 (b <sub>2</sub> , 0.7) | 205.3 (b, 0.6)  |
| 241.5 (a, 0.0)  | 217.1 (a, 2.9)  | 196.7 (a, 2.8)  | 220.5 (e, 0.2)               | 221.2 (b, 0.1)  |
| 247.4 (e, 1.2)  | 229.4 (a, 0.2)  | 216.4 (a, 4.0)  | 220.5 (e, 0.2)               | 224.5 (a, 0.1)  |
| 247.4 (e, 1.2)  | 249.2 (a, 0.4)  | 218.9 (a, 3.1)  | 225.9 (b <sub>1</sub> , 0.0) | 231.9 (a, 0.2)  |
| 250.1 (b, 10.2) | 288.9 (a, 2.4)  | 228.8 (a, 1.4)  | 247.3 (a <sub>1</sub> , 0.0) | 237.1 (a, 0.0)  |
| 288.2 (e, 2.9)  | 291.1 (a, 3.8)  | 282.6 (a, 1.0)  | 273.7 (a <sub>2</sub> , 0.0) | 270.0 (b, 1.0)  |
| 288.2 (e, 2.9)  | 293.4 (a, 4.5)  | 295.2 (a, 3.5)  | 275.7 (e, 0.8)               | 275.3 (b, 0.2)  |
| 293.1 (a, 0.0)  | 303.5 (a, 1.1)  | 298.1 (a, 1.7)  | 275.7 (e, 0.8)               | 276.1 (a, 0.4)  |
| 296.5 (b, 2.2)  | 305.8 (a, 0.9)  | 303.9 (a, 2.8)  | 296.3 (b <sub>2</sub> , 2.8) | 298.8 (a, 11.9) |
| 308.7 (e, 1.2)  | 316.7 (a, 0.5)  | 308.2 (a, 6.6)  | 302.6 (e, 4.0)               | 299.4 (b, 7.0)  |
| 308.7 (e, 1.2)  | 326.8 (a, 7.7)  | 312.5 (a, 2.2)  | 302.6 (e, 4.0)               | 303.9 (b, 4.7)  |
| 319.8 (b, 5.3)  | 343.3 (a, 1.5)  | 316.6 (a, 1.2)  | 316.4 (a <sub>1</sub> , 0.0) | 318.9 (a, 0.0)  |
| 323.7 (a, 0.0)  | 347.2 (a, 1.7)  | 321.5 (a, 0.4)  | 325.6 (e, 1.6)               | 324.0 (b, 0.0)  |
| 348.4 (b, 12.6) | 370.3 (a, 2.1)  | 335.8 (a, 0.2)  | 325.6 (e, 1.6)               | 329.4 (a, 0.0)  |
| 376.7 (e, 3.0)  | 386.9 (a, 0.2)  | 356.2 (a, 2.2)  | 348.8 (b <sub>1</sub> , 0.0) | 336.9 (b, 0.1)  |
| 376.7 (e, 3.0)  | 401.3 (a, 11.6) | 386.3 (a, 2.2)  | 350.0 (a <sub>2</sub> , 0.0) | 337.9 (a, 0.0)  |
| 398.2 (a, 0.0)  | 406.4 (a, 17.9) | 391.0 (a, 2.9)  | 371.2 (a <sub>1</sub> , 0.0) | 372.9 (a, 0.0)  |
| 432.0 (e, 2.4)  | 433.0 (a, 4.3)  | 398.6 (a, 2.2)  | 379.2 (b <sub>2</sub> , 7.1) | 376.3 (b, 5.7)  |
| 432.0 (e, 2.4)  | 445.2 (a, 2.8)  | 417.6 (a, 2.1)  | 393.1 (e, 0.1)               | 398.1 (b, 0.2)  |
| 444.4 (a, 0.0)  | 454.6 (a, 6.0)  | 443.2 (a, 10.1) | 393.1 (e, 0.1)               | 400.2 (a, 0.0)  |
| 450.4 (b, 0.0)  | 478.7 (a, 6.3)  | 455.2 (a, 0.6)  | 421.7 (a <sub>1</sub> , 0.0) | 429.8 (a, 0.1)  |
| 557.1 (a, 0.0)  | 484.2 (a, 22.3) | 470.1 (a, 13.1) | 450.1 (e, 0.7)               | 443.4 (b, 1.4)  |
| 564.1 (b, 0.8)  | 492.6 (a, 32.6) | 477.6 (a, 12.7) | 450.1 (e, 0.7)               | 444.9 (a, 0.6)  |
| 564.9 (e, 15.5) | 505.7 (a, 1.3)  | 483.1 (a, 0.8)  | 458.4 (e, 1.2)               | 456.2 (b, 0.4)  |
| 564.9 (e, 15.5) | 511.4 (a, 11.4) | 494.8 (a, 17.9) | 458.4 (e, 1.2)               | 457.6 (a, 1.2)  |

|                  |                  |                 |                                |                  |
|------------------|------------------|-----------------|--------------------------------|------------------|
| 576.2 (e, 5.3)   | 523.4 (a, 3.4)   | 509.8 (a, 9.2)  | 459.7 (b <sub>1</sub> , 0.0)   | 458.9 (b, 1.5)   |
| 576.2 (e, 5.3)   | 530.8 (a, 4.9)   | 523.5 (a, 10.7) | 460.6 (b <sub>2</sub> , 0.1)   | 461.2 (a, 0.8)   |
| 577.0 (a, 0.0)   | 562.9 (a, 0.6)   | 543.4 (a, 15.2) | 474.0 (a <sub>1</sub> , 0.0)   | 469.4 (a, 0.0)   |
| 577.7 (b, 7.5)   | 567.0 (a, 0.8)   | 570.7 (a, 0.5)  | 478.2 (b <sub>2</sub> , 48.6)  | 482.0 (b, 54.4)  |
| 580.4 (b, 3.7)   | 567.3 (a, 0.5)   | 572.9 (a, 0.4)  | 573.4 (b <sub>2</sub> , 1.6)   | 568.9 (b, 0.2)   |
| 582.5 (a, 0.0)   | 571.0 (a, 0.2)   | 573.4 (a, 0.8)  | 573.6 (a <sub>1</sub> , 0.0)   | 569.8 (a, 0.1)   |
| 584.2 (e, 9.3)   | 572.5 (a, 0.3)   | 576.1 (a, 0.8)  | 574.5 (e, 0.1)                 | 574.7 (b, 2.0)   |
| 584.2 (e, 9.3)   | 575.5 (a, 0.3)   | 576.6 (a, 1.5)  | 574.5 (e, 0.1)                 | 574.8 (a, 0.7)   |
| 623.3 (a, 0.0)   | 576.6 (a, 0.5)   | 577.4 (a, 0.3)  | 574.8 (e, 2.0)                 | 575.8 (a, 0.0)   |
| 637.4 (e, 3.8)   | 580.8 (a, 3.8)   | 579.3 (a, 1.7)  | 574.8 (e, 2.0)                 | 576.7 (b, 0.3)   |
| 637.4 (e, 3.8)   | 586.4 (a, 3.6)   | 580.1 (a, 2.7)  | 575.0 (a <sub>2</sub> , 0.0)   | 577.7 (a, 0.5)   |
| 654.9 (b, 17.0)  | 616.3 (a, 3.8)   | 581.6 (a, 1.0)  | 576.2 (b <sub>1</sub> , 0.0)   | 577.9 (b, 0.2)   |
| 768.1 (a, 0.0)   | 719.8 (a, 37.8)  | 768.7 (a, 74.9) | 777.4 (a <sub>2</sub> , 0.0)   | 773.4 (a, 8.2)   |
| 768.4 (e, 73.1)  | 740.7 (a, 25.8)  | 772.1 (a, 65.1) | 778.4 (e, 84.4)                | 773.4 (b, 79.4)  |
| 768.4 (e, 73.1)  | 749.5 (a, 19.4)  | 776.5 (a, 86.0) | 778.4 (e, 84.4)                | 774.3 (b, 40.8)  |
| 768.7 (b, 25.1)  | 753.5 (a, 13.0)  | 783.0 (a, 22.8) | 778.7 (b <sub>2</sub> , 120.1) | 777.5 (a, 124.7) |
| 772.8 (e, 39.9)  | 768.2 (a, 15.1)  | 784.4 (a, 13.7) | 783.3 (e, 87.2)                | 778.6 (b, 122.8) |
| 772.8 (e, 39.9)  | 777.8 (a, 29.9)  | 787.2 (a, 44.1) | 783.3 (e, 87.2)                | 781.9 (a, 9.6)   |
| 781.1 (b, 273.6) | 780.1 (a, 136.0) | 792.2 (a, 68.6) | 783.6 (b <sub>1</sub> , 0.0)   | 792.9 (a, 35.5)  |
| 783.6 (a, 0.0)   | 782.9 (a, 25.5)  | 792.5 (a, 21.8) | 785.4 (a <sub>1</sub> , 0.0)   | 793.7 (b, 108.4) |
| 795.3 (e, 23.5)  | 788.9 (a, 58.3)  | 793.5 (a, 14.1) | 801.5 (e, 1.2)                 | 795.2 (b, 31.4)  |
| 795.3 (e, 23.5)  | 791.2 (a, 11.0)  | 794.8 (a, 45.9) | 801.5 (e, 1.2)                 | 797.5 (a, 7.0)   |
| 804.3 (a, 0.0)   | 794.9 (a, 38.7)  | 804.8 (a, 72.6) | 811.1 (b <sub>2</sub> , 96.6)  | 801.3 (a, 9.9)   |
| 804.5 (b, 28.3)  | 795.4 (a, 16.8)  | 814.0 (a, 14.2) | 811.5 (a <sub>1</sub> , 0.0)   | 801.4 (b, 22.8)  |
| 818.1 (b, 3.2)   | 803.2 (a, 50.4)  | 815.6 (a, 3.6)  | 815.0 (a <sub>2</sub> , 0.0)   | 818.0 (b, 1.9)   |
| 818.2 (e, 0.1)   | 806.9 (a, 2.0)   | 816.4 (a, 0.4)  | 816.5 (b <sub>1</sub> , 0.0)   | 818.0 (a, 0.2)   |
| 818.2 (e, 0.1)   | 811.6 (a, 2.0)   | 817.5 (a, 0.8)  | 818.2 (e, 4.5)                 | 818.3 (b, 1.9)   |
| 818.2 (a, 0.0)   | 814.4 (a, 1.6)   | 818.4 (a, 27.9) | 818.2 (e, 4.5)                 | 818.7 (a, 0.6)   |
| 819.3 (e, 1.6)   | 815.2 (a, 0.1)   | 818.6 (a, 4.1)  | 819.3 (e, 0.2)                 | 819.4 (a, 2.7)   |
| 819.3 (e, 1.6)   | 816.0 (a, 0.1)   | 819.0 (a, 8.0)  | 819.3 (e, 0.2)                 | 820.0 (b, 7.7)   |
| 819.3 (a, 0.0)   | 816.9 (a, 1.5)   | 819.8 (a, 5.1)  | 819.4 (b <sub>2</sub> , 23.8)  | 820.1 (b, 5.3)   |
| 819.6 (b, 6.2)   | 818.1 (a, 0.4)   | 820.3 (a, 15.7) | 820.4 (a <sub>1</sub> , 0.0)   | 820.9 (a, 0.0)   |
| 855.6 (a, 0.0)   | 830.7 (a, 4.0)   | 851.0 (a, 0.4)  | 862.1 (e, 13.5)                | 862.0 (b, 0.5)   |
| 855.9 (b, 4.5)   | 835.8 (a, 0.5)   | 855.7 (a, 0.4)  | 862.1 (e, 13.5)                | 862.2 (a, 1.3)   |
| 867.7 (e, 2.1)   | 848.1 (a, 0.7)   | 861.5 (a, 3.3)  | 863.3 (b <sub>2</sub> , 9.7)   | 863.7 (a, 1.9)   |
| 867.7 (e, 2.1)   | 859.7 (a, 2.3)   | 862.9 (a, 0.3)  | 864.4 (a <sub>1</sub> , 0.0)   | 864.6 (b, 4.3)   |
| 869.5 (e, 7.5)   | 860.7 (a, 0.6)   | 869.9 (a, 1.9)  | 870.1 (a <sub>2</sub> , 0.0)   | 866.0 (a, 1.6)   |
| 869.5 (e, 7.5)   | 866.3 (a, 0.7)   | 870.7 (a, 4.7)  | 870.6 (b <sub>1</sub> , 0.0)   | 866.3 (b, 8.9)   |
| 870.9 (a, 0.0)   | 867.7 (a, 2.9)   | 878.9 (a, 1.1)  | 878.1 (e, 2.4)                 | 871.4 (a, 0.3)   |
| 870.9 (b, 4.2)   | 876.1 (a, 0.5)   | 879.9 (a, 0.2)  | 878.1 (e, 2.4)                 | 871.6 (b, 5.6)   |
| 998.7 (e, 10.8)  | 968.4 (a, 7.0)   | 991.0 (a, 6.6)  | 994.7 (e, 8.4)                 | 995.4 (a, 3.0)   |
| 998.7 (e, 10.8)  | 980.8 (a, 11.6)  | 991.9 (a, 4.9)  | 994.7 (e, 8.4)                 | 996.1 (b, 11.9)  |
| 999.8 (a, 0.0)   | 989.7 (a, 8.8)   | 992.2 (a, 8.0)  | 995.6 (b <sub>2</sub> , 7.5)   | 996.9 (a, 11.6)  |
| 999.9 (b, 4.3)   | 993.8 (a, 12.0)  | 994.2 (a, 5.1)  | 996.2 (a <sub>1</sub> , 0.0)   | 997.6 (b, 5.3)   |
| 1003.4 (e, 17.8) | 997.1 (a, 4.6)   | 996.0 (a, 5.6)  | 997.6 (a <sub>2</sub> , 0.0)   | 998.1 (b, 6.4)   |
| 1003.4 (e, 17.8) | 1004.0 (a, 5.5)  | 997.9 (a, 8.9)  | 998.3 (b <sub>1</sub> , 0.0)   | 998.3 (a, 5.4)   |
| 1008.2 (a, 0.0)  | 1004.8 (a, 3.3)  | 999.3 (a, 8.0)  | 999.0 (e, 10.0)                | 1002.0 (a, 0.3)  |
| 1008.2 (b, 0.1)  | 1009.7 (a, 8.5)  | 1003.4 (a, 2.4) | 999.0 (e, 10.0)                | 1002.3 (b, 5.7)  |
| 1045.6 (e, 0.3)  | 1027.2 (a, 3.1)  | 1037.9 (a, 0.7) | 1043.2 (e, 0.6)                | 1043.6 (a, 1.4)  |
| 1045.6 (e, 0.3)  | 1040.0 (a, 2.4)  | 1039.3 (a, 0.8) | 1043.2 (e, 0.6)                | 1043.8 (b, 0.8)  |
| 1047.9 (a, 0.0)  | 1041.8 (a, 5.9)  | 1040.8 (a, 1.3) | 1043.9 (a <sub>2</sub> , 0.0)  | 1044.9 (b, 0.3)  |
| 1048.4 (b, 0.2)  | 1043.5 (a, 1.2)  | 1041.2 (a, 0.7) | 1045.1 (b <sub>1</sub> , 0.0)  | 1045.3 (a, 2.0)  |
| 1049.3 (e, 1.9)  | 1045.7 (a, 0.3)  | 1044.0 (a, 0.4) | 1045.6 (e, 2.5)                | 1046.4 (a, 0.6)  |

|                 |                  |                 |                               |                 |
|-----------------|------------------|-----------------|-------------------------------|-----------------|
| 1049.3 (e, 1.9) | 1047.4 (a, 1.2)  | 1045.8 (a, 1.2) | 1045.6 (e, 2.5)               | 1046.7 (b, 2.9) |
| 1053.7 (a, 0.0) | 1051.5 (a, 2.9)  | 1047.2 (a, 0.6) | 1049.3 (b <sub>2</sub> , 0.3) | 1050.5 (a, 0.0) |
| 1054.4 (b, 6.8) | 1055.6 (a, 2.1)  | 1050.3 (a, 0.6) | 1049.5 (a <sub>1</sub> , 0.0) | 1050.9 (b, 1.0) |
| 1116.9 (e, 0.6) | 1088.9 (a, 9.4)  | 1110.8 (a, 1.8) | 1113.1 (e, 1.6)               | 1113.6 (b, 1.6) |
| 1116.9 (e, 0.6) | 1114.5 (a, 2.9)  | 1111.9 (a, 2.6) | 1113.1 (e, 1.6)               | 1113.6 (a, 1.7) |
| 1118.4 (a, 0.0) | 1116.1 (a, 3.9)  | 1112.7 (a, 1.8) | 1113.5 (b <sub>2</sub> , 4.4) | 1113.8 (b, 3.5) |
| 1118.4 (b, 4.6) | 1119.0 (a, 4.9)  | 1114.2 (a, 1.1) | 1113.7 (a <sub>1</sub> , 0.0) | 1113.9 (a, 0.0) |
| 1228.0 (e, 0.0) | 1212.5 (a, 0.1)  | 1219.8 (a, 0.0) | 1223.7 (a <sub>2</sub> , 0.0) | 1224.2 (a, 0.0) |
| 1228.0 (e, 0.0) | 1225.8 (a, 0.1)  | 1222.1 (a, 0.0) | 1224.2 (b <sub>1</sub> , 0.0) | 1224.3 (b, 0.0) |
| 1231.4 (a, 0.0) | 1226.1 (a, 0.1)  | 1222.7 (a, 0.0) | 1225.6 (e, 0.0)               | 1227.9 (a, 0.0) |
| 1231.6 (b, 0.0) | 1228.9 (a, 0.1)  | 1225.9 (a, 0.0) | 1225.6 (e, 0.0)               | 1228.3 (b, 0.1) |
| 1365.7 (a, 0.0) | 1318.3 (a, 64.6) | 1358.6 (a, 0.7) | 1364.4 (a <sub>2</sub> , 0.0) | 1364.3 (a, 0.1) |
| 1365.8 (e, 3.4) | 1336.4 (a, 2.8)  | 1362.4 (a, 1.4) | 1364.4 (b <sub>1</sub> , 0.0) | 1364.3 (b, 0.1) |
| 1365.8 (e, 3.4) | 1342.5 (a, 1.0)  | 1363.5 (a, 1.1) | 1367.6 (b <sub>2</sub> , 1.4) | 1366.5 (a, 0.1) |
| 1366.5 (b, 0.0) | 1366.7 (a, 0.6)  | 1364.1 (a, 0.7) | 1367.9 (e, 0.3)               | 1367.1 (b, 0.3) |
| 1372.6 (b, 0.4) | 1370.8 (a, 0.6)  | 1369.0 (a, 0.3) | 1367.9 (e, 0.3)               | 1368.2 (a, 0.4) |
| 1372.7 (a, 0.0) | 1371.0 (a, 0.1)  | 1370.3 (a, 1.1) | 1368.3 (e, 1.0)               | 1368.5 (b, 1.8) |
| 1373.4 (e, 3.0) | 1374.5 (a, 0.7)  | 1370.8 (a, 0.7) | 1368.3 (e, 1.0)               | 1371.4 (a, 0.2) |
| 1373.4 (e, 3.0) | 1375.4 (a, 0.2)  | 1371.8 (a, 1.3) | 1368.8 (a <sub>1</sub> , 0.0) | 1371.6 (b, 0.9) |
| 1417.6 (e, 2.7) | 1379.7 (a, 0.2)  | 1409.8 (a, 2.6) | 1412.5 (a <sub>2</sub> , 0.0) | 1413.8 (a, 0.8) |
| 1417.6 (e, 2.7) | 1389.0 (a, 1.1)  | 1411.3 (a, 1.9) | 1412.9 (b <sub>1</sub> , 0.0) | 1413.9 (b, 4.2) |
| 1418.5 (a, 0.0) | 1403.5 (a, 2.7)  | 1411.7 (a, 1.9) | 1413.9 (e, 5.7)               | 1414.7 (b, 1.6) |
| 1418.6 (b, 3.6) | 1411.8 (a, 1.4)  | 1413.3 (a, 1.6) | 1413.9 (e, 5.7)               | 1414.9 (a, 2.2) |
| 1420.8 (e, 3.1) | 1413.0 (a, 2.1)  | 1414.5 (a, 1.8) | 1415.8 (e, 0.6)               | 1418.4 (a, 1.0) |
| 1420.8 (e, 3.1) | 1414.3 (a, 1.7)  | 1418.6 (a, 1.6) | 1415.8 (e, 0.6)               | 1418.5 (b, 2.8) |
| 1423.1 (a, 0.0) | 1419.2 (a, 1.2)  | 1419.4 (a, 1.9) | 1417.2 (b <sub>2</sub> , 6.8) | 1419.5 (b, 0.8) |
| 1423.2 (b, 0.8) | 1422.7 (a, 1.7)  | 1427.0 (a, 2.8) | 1417.7 (a <sub>1</sub> , 0.0) | 1419.9 (a, 0.4) |
| 1538.0 (b,24.1) | 1423.7 (a, 2.9)  | 1669.8(a,607.4) | 1617.7 (e,670.9)              | 1615.0(b,671.6) |
| 1539.7(e,260.8) | 1711.5(a,305.3)  | 1686.9(a,229.1) | 1617.7 (e,670.9)              | 1615.2(a,662.4) |
| 1539.7(e,260.8) | 1742.4(a,774.8)  | 1705.1(a,464.7) | 1630.6(b <sub>2</sub> ,212.2) | 1628.0(b,219.1) |
| 1545.9 (a, 0.0) | 1779.8(a,513.7)  | 1716.5(a,243.8) | 1647.0 (a <sub>1</sub> , 0.0) | 1644.7 (a, 0.3) |
| 3170.9 (e, 0.1) | 3134.3 (a, 4.2)  | 3161.5 (a, 0.1) | 3170.3 (a <sub>2</sub> , 0.0) | 3169.7 (b, 1.2) |
| 3170.9 (e, 0.1) | 3149.1 (a, 0.4)  | 3166.5 (a, 0.4) | 3170.6 (b <sub>1</sub> , 0.0) | 3169.7 (a, 0.5) |
| 3171.1 (a, 0.0) | 3160.3 (a, 0.7)  | 3167.4 (a, 0.5) | 3171.2 (e, 0.0)               | 3171.1 (b, 0.5) |
| 3171.1 (b, 0.1) | 3163.8 (a, 0.1)  | 3168.1 (a, 0.4) | 3171.2 (e, 0.0)               | 3171.1 (a, 0.1) |
| 3173.2 (e, 0.2) | 3167.3 (a, 0.1)  | 3168.3 (a, 0.5) | 3171.7 (e, 0.1)               | 3171.6 (b, 0.2) |
| 3173.2 (e, 0.2) | 3168.6 (a, 0.7)  | 3170.0 (a, 0.1) | 3171.7 (e, 0.1)               | 3171.8 (a, 0.2) |
| 3173.8 (a, 0.0) | 3169.8 (a, 0.5)  | 3170.7 (a, 0.1) | 3171.9 (b <sub>2</sub> , 2.9) | 3172.3 (b, 0.7) |
| 3173.8 (b, 0.1) | 3170.2 (a, 0.8)  | 3172.5 (a, 0.4) | 3172.2 (a <sub>1</sub> , 0.0) | 3172.4 (a, 0.2) |
| 3184.4 (e, 0.7) | 3170.4 (a, 0.6)  | 3179.6 (a, 0.3) | 3182.0 (a <sub>2</sub> , 0.0) | 3182.1 (b, 0.5) |
| 3184.4 (e, 0.7) | 3171.2 (a, 2.1)  | 3180.9 (a, 0.5) | 3182.3 (b <sub>1</sub> , 0.0) | 3182.2 (a, 0.1) |
| 3184.8 (a, 0.0) | 3177.7 (a, 0.5)  | 3181.9 (a, 0.8) | 3182.5 (e, 0.0)               | 3183.1 (b, 0.0) |
| 3184.8 (b, 1.5) | 3179.8 (a, 2.5)  | 3182.0 (a, 0.4) | 3182.5 (e, 0.0)               | 3183.1 (a, 0.0) |
| 3187.1 (a, 0.0) | 3182.0 (a, 0.1)  | 3182.3 (a, 0.6) | 3185.7 (e, 0.1)               | 3185.7 (b, 0.1) |
| 3187.2 (b, 2.6) | 3183.9 (a, 0.8)  | 3182.4 (a, 1.0) | 3185.7 (e, 0.1)               | 3185.8 (a, 0.0) |
| 3187.5 (e, 0.5) | 3185.0 (a, 1.1)  | 3182.7 (a, 0.3) | 3186.4 (a <sub>1</sub> , 0.0) | 3186.0 (b, 0.0) |
| 3187.5 (e, 0.5) | 3187.1 (a, 0.7)  | 3186.6 (a, 0.0) | 3186.4 (b <sub>2</sub> , 0.1) | 3186.1 (a, 0.2) |
| 3196.6 (a, 0.0) | 3193.9 (a, 1.3)  | 3192.4 (a, 0.5) | 3194.6 (e, 0.0)               | 3194.2 (b, 0.3) |
| 3196.7 (b, 2.5) | 3195.4 (a, 0.8)  | 3192.6 (a, 0.3) | 3194.6 (e, 0.0)               | 3194.3 (a, 0.0) |
| 3197.5 (e, 0.4) | 3202.0 (a, 1.5)  | 3194.0 (a, 0.5) | 3194.8 (b <sub>2</sub> , 1.1) | 3195.1 (b, 0.2) |
| 3197.5 (e, 0.4) | 3202.8 (a, 1.2)  | 3195.1 (a, 0.3) | 3194.9 (a <sub>1</sub> , 0.0) | 3195.1 (a, 0.0) |

**Table S34.** Theoretical harmonic vibrational frequencies (in  $\text{cm}^{-1}$ ) for the four triplet structures of  $\text{Cp}_4\text{V}_4(\text{CO})_4$  by the BP86 method (infrared intensities in parentheses are in  $\text{km/mol}$ ).

| 4T-1           | 4T-2            | 4T-3            | 4T-4            |
|----------------|-----------------|-----------------|-----------------|
| 19.6 (a, 0.0)  | 36.2 (a, 0.1)   | 27.9 (a, 0.0)   | 47.6 (a, 0.3)   |
| 29.1 (a, 0.1)  | 49.4 (a, 0.2)   | 35.1 (a, 0.0)   | 50.2 (a, 0.6)   |
| 32.3 (a, 0.0)  | 50.3 (a, 0.5)   | 49.0 (a, 0.0)   | 58.1 (a, 1.0)   |
| 45.8 (a, 0.0)  | 62.9 (a, 0.6)   | 54.2 (a, 0.0)   | 59.0 (a, 0.6)   |
| 49.1 (a, 0.0)  | 66.3 (a, 0.2)   | 64.8 (a, 0.0)   | 63.2 (a, 0.5)   |
| 55.1 (a, 0.1)  | 71.8 (a, 0.3)   | 72.1 (a, 0.0)   | 71.2 (a, 0.4)   |
| 82.1 (a, 0.1)  | 75.0 (a, 0.0)   | 81.1 (a, 0.9)   | 74.0 (a, 0.1)   |
| 89.8 (a, 0.6)  | 87.3 (a, 0.5)   | 82.8 (a, 0.4)   | 76.6 (a, 0.1)   |
| 93.9 (a, 0.3)  | 98.3 (a, 0.1)   | 95.4 (a, 0.7)   | 77.4 (a, 0.0)   |
| 120.1 (a, 0.1) | 105.2 (a, 0.5)  | 107.0 (a, 0.0)  | 90.6 (a, 0.2)   |
| 132.0 (a, 1.2) | 108.4 (a, 0.2)  | 114.0 (a, 0.2)  | 112.4 (a, 1.0)  |
| 133.6 (a, 0.7) | 114.4 (a, 1.8)  | 129.4 (a, 0.9)  | 121.1 (a, 1.8)  |
| 143.6 (a, 0.0) | 118.9 (a, 0.6)  | 140.4 (a, 0.5)  | 137.0 (a, 0.8)  |
| 161.4 (a, 1.0) | 122.9 (a, 0.6)  | 149.2 (a, 0.3)  | 147.9 (a, 0.4)  |
| 162.7 (a, 1.1) | 127.8 (a, 0.3)  | 153.5 (a, 0.0)  | 158.4 (a, 0.1)  |
| 170.2 (a, 0.5) | 147.6 (a, 0.6)  | 159.9 (a, 0.1)  | 170.7 (a, 0.0)  |
| 172.0 (a, 0.8) | 151.6 (a, 0.6)  | 165.7 (a, 0.0)  | 174.0 (a, 0.2)  |
| 183.3 (a, 0.4) | 159.0 (a, 1.6)  | 181.6 (a, 0.4)  | 177.9 (a, 0.9)  |
| 187.5 (a, 1.6) | 172.8 (a, 0.7)  | 194.2 (a, 1.6)  | 196.2 (a, 2.0)  |
| 191.8 (a, 2.2) | 181.7 (a, 2.2)  | 202.3 (a, 2.5)  | 199.5 (a, 3.1)  |
| 207.0 (a, 2.2) | 190.8 (a, 0.6)  | 206.3 (a, 0.5)  | 206.2 (a, 0.9)  |
| 214.5 (a, 0.6) | 204.9 (a, 0.2)  | 212.6 (a, 2.0)  | 212.4 (a, 0.9)  |
| 234.5 (a, 1.2) | 207.9 (a, 1.4)  | 234.1 (a, 3.0)  | 213.6 (a, 1.3)  |
| 260.0 (a, 1.9) | 227.3 (a, 0.2)  | 235.7 (a, 0.4)  | 228.2 (a, 0.8)  |
| 269.5 (a, 0.8) | 239.8 (a, 0.9)  | 252.0 (a, 0.9)  | 234.1 (a, 2.0)  |
| 290.5 (a, 1.9) | 289.8 (a, 2.9)  | 255.9 (a, 6.9)  | 238.9 (a, 1.2)  |
| 294.7 (a, 2.3) | 293.0 (a, 4.5)  | 283.7 (a, 2.8)  | 251.3 (a, 4.4)  |
| 297.2 (a, 8.7) | 295.6 (a, 7.2)  | 286.1 (a, 2.8)  | 258.3 (a, 1.7)  |
| 299.8 (a, 4.2) | 301.5 (a, 1.3)  | 288.4 (a, 2.9)  | 259.9 (a, 1.3)  |
| 306.4 (a, 3.6) | 308.9 (a, 0.4)  | 294.0 (a, 0.7)  | 276.7 (a, 2.0)  |
| 310.8 (a, 0.8) | 311.6 (a, 1.2)  | 305.1 (a, 2.2)  | 277.8 (a, 1.4)  |
| 326.1 (a, 2.3) | 320.0 (a, 0.1)  | 315.0 (a, 2.5)  | 285.9 (a, 2.2)  |
| 333.0 (a, 1.3) | 338.4 (a, 1.2)  | 319.2 (a, 0.4)  | 290.5 (a, 0.2)  |
| 354.2 (a, 5.5) | 350.6 (a, 1.5)  | 324.7 (a, 0.1)  | 314.8 (a, 2.1)  |
| 361.9 (a, 3.1) | 372.9 (a, 0.7)  | 345.7 (a, 13.8) | 331.6 (a, 1.2)  |
| 377.4 (a, 4.3) | 378.8 (a, 2.6)  | 354.4 (a, 3.6)  | 339.8 (a, 3.4)  |
| 390.3 (a, 6.7) | 393.5 (a, 6.3)  | 375.8 (a, 2.8)  | 354.9 (a, 2.5)  |
| 399.5 (a, 8.1) | 411.1 (a, 10.7) | 383.1 (a, 1.0)  | 362.8 (a, 5.6)  |
| 421.8 (a, 3.8) | 411.4 (a, 1.5)  | 395.6 (a, 0.0)  | 371.6 (a, 11.9) |
| 434.4 (a, 1.9) | 442.1 (a, 1.9)  | 404.3 (a, 30.1) | 383.7 (a, 44.0) |
| 438.9 (a, 3.2) | 457.3 (a, 1.7)  | 432.4 (a, 3.5)  | 405.1 (a, 42.9) |
| 477.1 (a, 0.3) | 465.8 (a, 9.2)  | 443.6 (a, 0.2)  | 411.0 (a, 35.4) |
| 478.5 (a, 4.4) | 479.5 (a, 4.1)  | 518.2 (a, 5.3)  | 419.0 (a, 38.5) |
| 493.3 (a, 2.1) | 483.1 (a, 15.9) | 532.0 (a, 0.7)  | 426.1 (a, 6.6)  |
| 505.7 (a, 6.1) | 496.0 (a, 10.2) | 564.2 (a, 0.2)  | 436.9 (a, 6.9)  |
| 511.5 (a, 9.9) | 498.5 (a, 26.4) | 567.9 (a, 3.9)  | 438.9 (a, 8.2)  |
| 552.4 (a, 2.8) | 506.5 (a, 6.9)  | 570.6 (a, 0.0)  | 454.7 (a, 8.5)  |

|                  |                  |                  |                  |
|------------------|------------------|------------------|------------------|
| 571.1 (a, 3.9)   | 516.4 (a, 8.9)   | 570.9 (a, 0.4)   | 457.6 (a, 1.1)   |
| 573.1 (a, 0.1)   | 565.8 (a, 0.4)   | 575.3 (a, 0.3)   | 465.3 (a, 3.2)   |
| 573.7 (a, 0.2)   | 568.8 (a, 0.5)   | 575.6 (a, 1.4)   | 477.3 (a, 9.4)   |
| 577.2 (a, 1.1)   | 570.3 (a, 0.6)   | 576.4 (a, 5.1)   | 555.5 (a, 1.0)   |
| 578.0 (a, 0.5)   | 570.9 (a, 0.3)   | 576.8 (a, 4.7)   | 567.0 (a, 0.4)   |
| 578.7 (a, 1.0)   | 573.7 (a, 1.3)   | 579.9 (a, 1.1)   | 578.8 (a, 7.5)   |
| 579.8 (a, 2.6)   | 575.3 (a, 1.7)   | 583.3 (a, 8.7)   | 590.9 (a, 2.7)   |
| 583.4 (a, 1.7)   | 576.4 (a, 1.9)   | 610.7 (a, 6.2)   | 592.6 (a, 1.9)   |
| 593.4 (a, 3.3)   | 578.8 (a, 3.0)   | 612.9 (a, 1.1)   | 598.0 (a, 0.3)   |
| 616.0 (a, 5.0)   | 583.0 (a, 0.3)   | 634.3 (a, 7.6)   | 620.9 (a, 1.7)   |
| 622.2 (a, 9.3)   | 604.1 (a, 2.2)   | 640.5 (a, 29.6)  | 623.4 (a, 1.3)   |
| 770.3 (a, 49.6)  | 737.2 (a, 16.9)  | 746.6 (a, 74.9)  | 702.6 (a, 21.2)  |
| 774.7 (a, 96.5)  | 747.0 (a, 56.0)  | 750.3 (a, 32.4)  | 714.8 (a, 5.9)   |
| 775.2 (a, 53.9)  | 756.1 (a, 65.2)  | 757.7 (a, 54.5)  | 715.9 (a, 1.0)   |
| 778.4 (a, 146.5) | 761.3 (a, 10.7)  | 758.4 (a, 21.7)  | 727.0 (a, 2.3)   |
| 780.9 (a, 36.0)  | 764.7 (a, 5.8)   | 769.8 (a, 12.4)  | 737.0 (a, 1.2)   |
| 782.0 (a, 11.2)  | 775.2 (a, 0.9)   | 775.3 (a, 71.9)  | 739.5 (a, 3.1)   |
| 785.9 (a, 36.6)  | 781.6 (a, 54.0)  | 777.3 (a, 159.8) | 743.4 (a, 11.8)  |
| 789.8 (a, 34.8)  | 782.1 (a, 38.6)  | 780.0 (a, 46.8)  | 746.1 (a, 3.8)   |
| 793.9 (a, 30.2)  | 784.5 (a, 38.5)  | 781.5 (a, 36.1)  | 750.3 (a, 6.6)   |
| 795.8 (a, 32.0)  | 786.7 (a, 98.5)  | 792.5 (a, 39.4)  | 752.0 (a, 10.8)  |
| 797.8 (a, 21.4)  | 796.4 (a, 57.2)  | 796.6 (a, 9.9)   | 760.8 (a, 21.2)  |
| 803.1 (a, 38.8)  | 803.0 (a, 31.4)  | 802.1 (a, 13.3)  | 764.7 (a, 6.8)   |
| 815.3 (a, 1.2)   | 809.3 (a, 0.7)   | 814.9 (a, 0.1)   | 772.1 (a, 2.4)   |
| 816.2 (a, 0.2)   | 811.5 (a, 9.9)   | 816.3 (a, 0.5)   | 773.5 (a, 6.6)   |
| 816.9 (a, 0.9)   | 812.1 (a, 0.2)   | 816.5 (a, 0.4)   | 780.6 (a, 3.5)   |
| 817.6 (a, 5.3)   | 814.2 (a, 1.4)   | 816.8 (a, 0.7)   | 785.5 (a, 4.0)   |
| 818.6 (a, 4.6)   | 815.6 (a, 0.9)   | 817.8 (a, 2.2)   | 788.9 (a, 3.1)   |
| 819.2 (a, 5.8)   | 816.4 (a, 1.3)   | 818.2 (a, 3.0)   | 794.7 (a, 11.5)  |
| 819.4 (a, 0.8)   | 817.2 (a, 0.2)   | 818.7 (a, 0.1)   | 800.6 (a, 9.2)   |
| 820.2 (a, 2.8)   | 819.1 (a, 2.0)   | 819.2 (a, 1.6)   | 805.5 (a, 2.5)   |
| 857.6 (a, 1.2)   | 838.7 (a, 4.3)   | 837.7 (a, 0.1)   | 836.1 (a, 1.9)   |
| 859.8 (a, 6.2)   | 844.1 (a, 2.6)   | 854.4 (a, 1.7)   | 842.5 (a, 0.2)   |
| 860.9 (a, 1.4)   | 848.2 (a, 0.7)   | 859.4 (a, 4.3)   | 853.8 (a, 0.9)   |
| 863.3 (a, 0.8)   | 854.3 (a, 5.4)   | 863.0 (a, 3.0)   | 862.6 (a, 1.5)   |
| 864.7 (a, 2.6)   | 857.7 (a, 0.3)   | 863.3 (a, 8.4)   | 868.1 (a, 1.5)   |
| 867.0 (a, 5.0)   | 863.9 (a, 1.0)   | 867.2 (a, 2.9)   | 870.2 (a, 1.7)   |
| 867.8 (a, 1.2)   | 868.4 (a, 5.8)   | 868.3 (a, 11.2)  | 873.4 (a, 0.7)   |
| 870.6 (a, 1.4)   | 879.4 (a, 3.2)   | 869.4 (a, 2.8)   | 903.1 (a, 3.0)   |
| 992.1 (a, 7.0)   | 976.5 (a, 6.9)   | 994.8 (a, 13.9)  | 922.3 (a, 1.2)   |
| 994.8 (a, 6.8)   | 980.0 (a, 7.6)   | 996.2 (a, 1.8)   | 928.6 (a, 1.4)   |
| 995.3 (a, 9.4)   | 991.6 (a, 12.4)  | 996.5 (a, 11.0)  | 936.1 (a, 9.6)   |
| 995.5 (a, 10.5)  | 994.7 (a, 11.6)  | 998.0 (a, 2.5)   | 944.6 (a, 8.6)   |
| 997.6 (a, 3.1)   | 998.7 (a, 1.9)   | 998.3 (a, 1.0)   | 959.9 (a, 5.5)   |
| 999.2 (a, 10.4)  | 1000.5 (a, 7.0)  | 999.8 (a, 15.5)  | 961.6 (a, 5.2)   |
| 1000.7 (a, 12.6) | 1007.0 (a, 0.8)  | 1002.4 (a, 20.7) | 963.4 (a, 4.6)   |
| 1000.7 (a, 0.4)  | 1009.0 (a, 13.6) | 1003.9 (a, 0.0)  | 966.3 (a, 1.4)   |
| 1038.5 (a, 0.5)  | 1031.3 (a, 4.5)  | 1037.0 (a, 0.3)  | 1006.9 (a, 13.5) |
| 1041.8 (a, 0.7)  | 1040.0 (a, 1.5)  | 1040.7 (a, 0.4)  | 1012.1 (a, 13.0) |
| 1043.7 (a, 0.3)  | 1042.4 (a, 1.6)  | 1044.4 (a, 2.2)  | 1017.3 (a, 0.7)  |
| 1044.4 (a, 1.2)  | 1044.3 (a, 4.8)  | 1045.4 (a, 0.0)  | 1019.1 (a, 0.5)  |
| 1045.2 (a, 0.2)  | 1046.5 (a, 0.1)  | 1045.7 (a, 0.6)  | 1026.2 (a, 1.7)  |
| 1045.8 (a, 0.3)  | 1048.3 (a, 0.8)  | 1045.7 (a, 1.8)  | 1030.0 (a, 2.2)  |



|                   |                   |                   |                    |
|-------------------|-------------------|-------------------|--------------------|
| 1046.4 (a, 0.6)   | 1053.7 (a, 1.3)   | 1047.1 (a, 1.4)   | 1033.3 (a, 0.1)    |
| 1048.5 (a, 0.9)   | 1055.4 (a, 3.6)   | 1049.9 (a, 2.8)   | 1034.3 (a, 6.0)    |
| 1113.3 (a, 2.3)   | 1095.6 (a, 5.5)   | 1114.8 (a, 2.0)   | 1036.4 (a, 1.3)    |
| 1114.2 (a, 1.2)   | 1111.5 (a, 4.4)   | 1115.3 (a, 0.8)   | 1040.9 (a, 0.7)    |
| 1114.7 (a, 1.8)   | 1114.0 (a, 3.2)   | 1115.8 (a, 4.1)   | 1052.9 (a, 1.8)    |
| 1115.7 (a, 2.1)   | 1117.7 (a, 5.4)   | 1116.8 (a, 2.0)   | 1054.8 (a, 4.3)    |
| 1222.3 (a, 0.0)   | 1210.7 (a, 0.3)   | 1224.0 (a, 0.0)   | 1204.3 (a, 0.1)    |
| 1223.6 (a, 0.0)   | 1226.4 (a, 0.0)   | 1225.7 (a, 0.0)   | 1207.0 (a, 0.1)    |
| 1224.4 (a, 0.0)   | 1228.2 (a, 0.1)   | 1226.0 (a, 0.0)   | 1211.8 (a, 0.1)    |
| 1226.6 (a, 0.0)   | 1230.2 (a, 0.0)   | 1229.8 (a, 0.0)   | 1213.2 (a, 0.2)    |
| 1365.3 (a, 8.5)   | 1302.8 (a, 54.0)  | 1365.4 (a, 0.0)   | 1259.6 (a, 1.6)    |
| 1365.7 (a, 0.2)   | 1337.2 (a, 0.3)   | 1366.0 (a, 2.5)   | 1266.1 (a, 2.5)    |
| 1366.1 (a, 2.7)   | 1356.0 (a, 0.8)   | 1366.5 (a, 3.4)   | 1267.1 (a, 0.6)    |
| 1366.3 (a, 1.2)   | 1363.7 (a, 0.3)   | 1366.7 (a, 0.1)   | 1276.1 (a, 2.3)    |
| 1367.2 (a, 0.9)   | 1370.6 (a, 0.7)   | 1370.6 (a, 0.7)   | 1281.0 (a, 1.4)    |
| 1368.7 (a, 0.2)   | 1371.4 (a, 0.2)   | 1370.6 (a, 3.1)   | 1284.4 (a, 5.4)    |
| 1369.6 (a, 2.7)   | 1372.3 (a, 0.4)   | 1371.6 (a, 0.2)   | 1297.5 (a, 2.4)    |
| 1371.1 (a, 38.8)  | 1373.1 (a, 0.3)   | 1372.1 (a, 3.3)   | 1316.4 (a, 3.6)    |
| 1372.4 (a, 3.6)   | 1378.5 (a, 0.3)   | 1412.5 (a, 4.0)   | 1325.6 (a, 2.1)    |
| 1410.7 (a, 1.6)   | 1392.0 (a, 1.7)   | 1413.9 (a, 1.1)   | 1336.4 (a, 1.4)    |
| 1411.8 (a, 1.3)   | 1409.2 (a, 1.8)   | 1416.9 (a, 2.4)   | 1337.0 (a, 0.2)    |
| 1414.1 (a, 1.0)   | 1410.8 (a, 3.5)   | 1417.8 (a, 2.0)   | 1342.5 (a, 0.9)    |
| 1415.5 (a, 2.9)   | 1412.6 (a, 1.6)   | 1418.6 (a, 0.4)   | 1347.2 (a, 1.3)    |
| 1418.1 (a, 1.1)   | 1414.8 (a, 1.8)   | 1418.9 (a, 3.3)   | 1358.9 (a, 3.8)    |
| 1419.8 (a, 1.8)   | 1418.0 (a, 1.7)   | 1419.8 (a, 1.2)   | 1394.1 (a, 2.3)    |
| 1421.6 (a, 1.6)   | 1421.6 (a, 3.0)   | 1421.2 (a, 0.4)   | 1412.2 (a, 1.4)    |
| 1422.7 (a, 2.7)   | 1422.1 (a, 0.5)   | 1516.7 (a, 25.4)  | 1893.2 (a, 1786.4) |
| 1517.7 (a, 188.3) | 1730.9 (a, 430.9) | 1516.7 (a, 282.3) | 1898.1 (a, 1934.7) |
| 1625.8 (a, 357.9) | 1748.6 (a, 635.8) | 1540.0 (a, 358.4) | 1898.8 (a, 1887.7) |
| 1655.8 (a, 314.0) | 1802.8 (a, 567.1) | 1568.5 (a, 18.7)  | 1920.4 (a, 22.4)   |
| 3157.4 (a, 0.5)   | 3099.8 (a, 5.3)   | 3164.8 (a, 0.1)   | 3091.4 (a, 4.2)    |
| 3160.6 (a, 0.7)   | 3149.5 (a, 0.5)   | 3164.8 (a, 0.1)   | 3101.8 (a, 4.0)    |
| 3165.7 (a, 0.1)   | 3160.7 (a, 0.6)   | 3170.6 (a, 0.1)   | 3102.8 (a, 1.5)    |
| 3165.8 (a, 0.1)   | 3164.8 (a, 0.2)   | 3170.7 (a, 0.1)   | 3106.1 (a, 3.7)    |
| 3167.4 (a, 0.3)   | 3167.0 (a, 0.0)   | 3172.0 (a, 0.4)   | 3124.3 (a, 2.6)    |
| 3170.0 (a, 0.2)   | 3170.5 (a, 1.2)   | 3172.1 (a, 0.1)   | 3125.8 (a, 0.5)    |
| 3171.2 (a, 0.1)   | 3170.7 (a, 0.2)   | 3172.2 (a, 0.0)   | 3128.6 (a, 1.1)    |
| 3174.3 (a, 0.1)   | 3171.2 (a, 0.5)   | 3172.6 (a, 0.0)   | 3130.2 (a, 0.8)    |
| 3177.8 (a, 0.6)   | 3171.4 (a, 0.3)   | 3181.2 (a, 1.1)   | 3132.7 (a, 6.3)    |
| 3178.7 (a, 0.6)   | 3174.1 (a, 0.6)   | 3181.2 (a, 0.4)   | 3133.6 (a, 0.2)    |
| 3182.0 (a, 0.5)   | 3175.9 (a, 0.3)   | 3183.7 (a, 1.0)   | 3135.0 (a, 0.9)    |
| 3182.3 (a, 0.3)   | 3181.3 (a, 0.6)   | 3183.9 (a, 0.2)   | 3139.7 (a, 2.5)    |
| 3182.5 (a, 0.7)   | 3182.1 (a, 1.2)   | 3184.3 (a, 0.6)   | 3143.0 (a, 2.4)    |
| 3182.6 (a, 0.1)   | 3186.9 (a, 1.3)   | 3184.7 (a, 1.4)   | 3145.2 (a, 2.7)    |
| 3183.2 (a, 0.3)   | 3187.0 (a, 1.2)   | 3185.8 (a, 1.7)   | 3145.4 (a, 1.7)    |
| 3188.7 (a, 0.5)   | 3187.3 (a, 0.5)   | 3186.0 (a, 0.2)   | 3146.0 (a, 0.3)    |
| 3192.9 (a, 0.6)   | 3194.0 (a, 0.5)   | 3195.2 (a, 0.6)   | 3151.9 (a, 1.1)    |
| 3194.3 (a, 0.4)   | 3196.8 (a, 0.8)   | 3195.4 (a, 0.6)   | 3157.3 (a, 0.7)    |
| 3194.4 (a, 0.2)   | 3196.9 (a, 1.5)   | 3195.7 (a, 1.5)   | 3163.0 (a, 1.9)    |
| 3200.6 (a, 0.2)   | 3207.1 (a, 1.1)   | 3196.6 (a, 0.4)   | 3166.5 (a, 0.3)    |

**Table S35.** Theoretical harmonic vibrational frequencies (in  $\text{cm}^{-1}$ ) for the three quintet structures of  $\text{Cp}_4\text{V}_4(\text{CO})_4$  by the BP86 method (infrared intensities in parentheses are in  $\text{km/mol}$ ).

| 4Q-1            | 4Q-2            | 4Q-3            |
|-----------------|-----------------|-----------------|
| 32.2 (a, 0.0)   | 45.2 (a, 0.8)   | 48.2 (a, 0.0)   |
| 36.3 (a, 0.0)   | 51.1 (a, 0.3)   | 49.8 (b, 0.5)   |
| 42.2 (a, 0.0)   | 53.9 (a, 0.2)   | 56.1 (a, 0.2)   |
| 49.5 (a, 0.1)   | 55.5 (a, 0.6)   | 59.6 (b, 1.4)   |
| 52.0 (a, 0.1)   | 57.4 (a, 1.0)   | 60.8 (a, 0.2)   |
| 62.1 (a, 0.0)   | 59.1 (a, 1.2)   | 61.0 (b, 0.3)   |
| 78.6 (a, 0.4)   | 61.9 (a, 0.0)   | 72.1 (a, 0.0)   |
| 92.1 (a, 0.3)   | 75.6 (a, 0.2)   | 73.0 (b, 0.1)   |
| 94.6 (a, 0.4)   | 77.2 (a, 0.4)   | 80.0 (b, 0.5)   |
| 114.1 (a, 1.5)  | 107.1 (a, 1.2)  | 85.2 (a, 0.1)   |
| 132.5 (a, 0.3)  | 117.7 (a, 0.2)  | 116.0 (a, 0.1)  |
| 135.0 (a, 0.3)  | 122.4 (a, 0.1)  | 117.9 (b, 0.0)  |
| 142.2 (a, 0.4)  | 125.5 (a, 0.1)  | 130.7 (a, 0.1)  |
| 145.6 (a, 0.3)  | 139.0 (a, 0.2)  | 142.7 (b, 0.1)  |
| 162.9 (a, 0.2)  | 147.4 (a, 1.0)  | 150.0 (a, 0.4)  |
| 172.3 (a, 1.2)  | 151.3 (a, 3.2)  | 158.5 (a, 0.1)  |
| 178.2 (a, 0.2)  | 159.3 (a, 2.9)  | 163.7 (b, 2.0)  |
| 179.0 (a, 0.6)  | 167.9 (a, 1.4)  | 180.1 (b, 3.7)  |
| 191.4 (a, 0.3)  | 173.5 (a, 1.8)  | 184.2 (a, 0.0)  |
| 195.2 (a, 1.1)  | 176.6 (a, 1.8)  | 192.3 (b, 3.3)  |
| 215.5 (a, 2.5)  | 179.6 (a, 2.8)  | 194.0 (a, 1.6)  |
| 226.5 (a, 0.3)  | 198.0 (a, 1.8)  | 207.5 (b, 1.3)  |
| 230.8 (a, 1.0)  | 204.1 (a, 1.6)  | 209.8 (a, 0.2)  |
| 264.2 (a, 3.9)  | 217.2 (a, 4.9)  | 219.1 (b, 1.9)  |
| 268.6 (a, 0.6)  | 222.1 (a, 1.3)  | 221.3 (a, 0.5)  |
| 282.9 (a, 1.4)  | 242.8 (a, 0.4)  | 234.0 (b, 0.5)  |
| 290.0 (a, 0.6)  | 247.3 (a, 10.7) | 234.9 (a, 0.0)  |
| 297.5 (a, 4.7)  | 290.0 (a, 1.5)  | 237.4 (a, 0.0)  |
| 302.8 (a, 3.1)  | 292.9 (a, 3.1)  | 249.8 (b, 2.1)  |
| 311.7 (a, 4.5)  | 300.5 (a, 2.5)  | 252.1 (a, 0.1)  |
| 317.5 (a, 6.9)  | 305.2 (a, 4.3)  | 255.7 (b, 1.3)  |
| 324.8 (a, 5.6)  | 306.9 (a, 2.3)  | 270.5 (a, 0.7)  |
| 337.2 (a, 2.4)  | 317.3 (a, 0.3)  | 271.9 (b, 1.7)  |
| 341.7 (a, 7.2)  | 318.1 (a, 0.9)  | 283.7 (a, 0.4)  |
| 351.3 (a, 6.1)  | 324.9 (a, 4.0)  | 294.3 (b, 3.2)  |
| 359.9 (a, 6.6)  | 342.7 (a, 0.1)  | 311.1 (a, 0.0)  |
| 371.3 (a, 7.8)  | 354.0 (a, 1.3)  | 336.1 (b, 5.2)  |
| 376.1 (a, 11.8) | 376.7 (a, 4.9)  | 365.7 (a, 0.7)  |
| 381.6 (a, 3.4)  | 383.8 (a, 4.4)  | 366.7 (b, 3.4)  |
| 396.3 (a, 10.4) | 403.8 (a, 2.0)  | 394.0 (a, 29.9) |
| 412.2 (a, 7.0)  | 417.3 (a, 6.4)  | 395.7 (b, 40.8) |
| 420.4 (a, 0.9)  | 422.3 (a, 3.6)  | 405.6 (b, 43.9) |
| 433.5 (a, 1.5)  | 435.2 (a, 0.3)  | 417.2 (b, 31.8) |
| 449.9 (a, 2.2)  | 454.3 (a, 3.7)  | 418.2 (a, 15.4) |
| 471.5 (a, 1.1)  | 460.7 (a, 7.4)  | 428.5 (a, 17.1) |
| 494.6 (a, 11.2) | 471.9 (a, 4.5)  | 441.5 (a, 7.9)  |
| 541.5 (a, 2.8)  | 479.6 (a, 0.3)  | 447.2 (b, 2.0)  |

|                  |                  |                 |
|------------------|------------------|-----------------|
| 555.0 (a, 2.7)   | 487.0 (a, 17.5)  | 459.9 (a, 0.3)  |
| 572.8 (a, 0.2)   | 496.6 (a, 3.2)   | 464.0 (b, 16.0) |
| 575.7 (a, 0.2)   | 514.7 (a, 10.4)  | 468.8 (a, 9.6)  |
| 576.5 (a, 1.0)   | 574.4 (a, 0.8)   | 550.7 (a, 0.8)  |
| 579.8 (a, 1.4)   | 574.7 (a, 0.2)   | 551.6 (b, 0.4)  |
| 581.2 (a, 0.1)   | 575.2 (a, 0.4)   | 569.5 (b, 2.3)  |
| 581.9 (a, 1.0)   | 575.8 (a, 0.0)   | 572.4 (a, 2.9)  |
| 582.2 (a, 1.6)   | 576.3 (a, 0.5)   | 597.9 (b, 0.2)  |
| 583.1 (a, 0.2)   | 577.1 (a, 0.5)   | 602.4 (a, 0.2)  |
| 612.7 (a, 8.2)   | 579.6 (a, 0.1)   | 628.9 (a, 0.8)  |
| 632.8 (a, 2.8)   | 580.2 (a, 1.0)   | 630.1 (b, 2.7)  |
| 773.1 (a, 60.7)  | 779.8 (a, 87.1)  | 691.4 (b, 22.3) |
| 774.9 (a, 73.6)  | 780.1 (a, 122.8) | 698.7 (a, 16.7) |
| 776.3 (a, 105.8) | 783.7 (a, 90.4)  | 706.2 (b, 2.5)  |
| 777.9 (a, 50.8)  | 785.6 (a, 41.6)  | 708.5 (a, 2.3)  |
| 779.2 (a, 9.9)   | 788.6 (a, 22.1)  | 712.5 (b, 37.0) |
| 785.6 (a, 36.4)  | 789.7 (a, 37.9)  | 719.7 (a, 3.6)  |
| 788.3 (a, 68.8)  | 789.9 (a, 36.5)  | 721.0 (b, 1.9)  |
| 788.8 (a, 63.1)  | 792.1 (a, 10.4)  | 737.0 (b, 5.4)  |
| 793.3 (a, 32.9)  | 798.2 (a, 26.8)  | 742.3 (a, 0.3)  |
| 796.9 (a, 30.7)  | 799.9 (a, 14.5)  | 745.0 (a, 3.8)  |
| 798.9 (a, 26.9)  | 803.8 (a, 92.1)  | 756.2 (b, 2.0)  |
| 800.7 (a, 8.2)   | 804.9 (a, 20.2)  | 768.1 (b, 18.5) |
| 815.9 (a, 0.6)   | 816.8 (a, 1.5)   | 768.4 (a, 0.1)  |
| 816.5 (a, 1.7)   | 817.8 (a, 2.0)   | 771.2 (b, 1.1)  |
| 817.3 (a, 1.6)   | 818.5 (a, 1.9)   | 772.2 (a, 6.4)  |
| 818.0 (a, 4.5)   | 818.7 (a, 4.7)   | 778.7 (a, 19.9) |
| 818.5 (a, 1.1)   | 819.2 (a, 0.2)   | 779.6 (b, 15.8) |
| 818.7 (a, 4.3)   | 819.6 (a, 4.2)   | 789.8 (a, 0.0)  |
| 820.3 (a, 0.8)   | 820.1 (a, 1.9)   | 801.1 (b, 8.3)  |
| 821.0 (a, 6.7)   | 820.6 (a, 8.8)   | 801.3 (a, 2.7)  |
| 855.8 (a, 1.4)   | 856.1 (a, 0.7)   | 829.4 (a, 1.1)  |
| 857.0 (a, 0.8)   | 860.3 (a, 1.0)   | 834.1 (b, 1.6)  |
| 859.6 (a, 1.8)   | 861.9 (a, 2.0)   | 848.9 (b, 0.2)  |
| 862.2 (a, 0.3)   | 865.3 (a, 1.6)   | 851.5 (a, 0.1)  |
| 863.9 (a, 1.6)   | 866.3 (a, 1.0)   | 859.2 (b, 0.9)  |
| 866.9 (a, 1.0)   | 869.2 (a, 1.1)   | 860.3 (a, 2.3)  |
| 872.2 (a, 6.4)   | 871.6 (a, 2.0)   | 894.0 (b, 4.2)  |
| 875.3 (a, 0.3)   | 875.2 (a, 1.0)   | 894.9 (a, 0.2)  |
| 992.3 (a, 8.1)   | 993.3 (a, 6.6)   | 914.4 (b, 8.0)  |
| 993.8 (a, 8.0)   | 994.3 (a, 8.4)   | 919.5 (a, 4.4)  |
| 994.8 (a, 7.6)   | 995.2 (a, 9.5)   | 962.6 (b, 3.0)  |
| 995.9 (a, 6.8)   | 996.4 (a, 3.1)   | 965.2 (b, 8.6)  |
| 997.6 (a, 7.8)   | 997.1 (a, 2.3)   | 967.6 (a, 1.2)  |
| 999.9 (a, 3.9)   | 997.6 (a, 3.6)   | 970.8 (a, 1.0)  |
| 1000.5 (a, 17.6) | 998.3 (a, 7.3)   | 976.3 (b, 5.9)  |
| 1002.7 (a, 3.6)  | 1000.4 (a, 7.0)  | 976.7 (a, 3.3)  |
| 1038.4 (a, 0.3)  | 1038.2 (a, 0.4)  | 998.7 (b, 23.4) |
| 1041.2 (a, 1.0)  | 1041.0 (a, 0.3)  | 1002.7 (a, 4.7) |
| 1042.6 (a, 0.3)  | 1041.5 (a, 0.4)  | 1015.6 (b, 0.5) |
| 1043.6 (a, 0.0)  | 1042.5 (a, 0.4)  | 1016.8 (a, 0.1) |
| 1045.1 (a, 1.0)  | 1043.3 (a, 0.1)  | 1033.3 (b, 0.0) |
| 1045.9 (a, 0.6)  | 1044.9 (a, 0.6)  | 1034.5 (a, 0.7) |

|                   |                   |                    |
|-------------------|-------------------|--------------------|
| 1047.0 (a, 0.2)   | 1045.7 (a, 0.2)   | 1035.4 (b, 2.9)    |
| 1049.2 (a, 0.5)   | 1049.4 (a, 0.0)   | 1038.7 (a, 1.6)    |
| 1113.0 (a, 2.5)   | 1112.9 (a, 1.6)   | 1039.8 (b, 2.3)    |
| 1113.3 (a, 2.4)   | 1113.0 (a, 1.8)   | 1041.9 (a, 0.0)    |
| 1113.5 (a, 2.3)   | 1113.4 (a, 3.2)   | 1056.5 (b, 4.8)    |
| 1115.6 (a, 2.4)   | 1113.5 (a, 0.2)   | 1059.0 (a, 4.4)    |
| 1223.0 (a, 0.0)   | 1219.3 (a, 0.0)   | 1204.0 (b, 0.2)    |
| 1223.9 (a, 0.0)   | 1221.9 (a, 0.0)   | 1204.3 (a, 0.1)    |
| 1224.0 (a, 0.0)   | 1223.3 (a, 0.0)   | 1215.3 (b, 0.0)    |
| 1226.1 (a, 0.0)   | 1223.6 (a, 0.0)   | 1216.8 (a, 0.0)    |
| 1359.9 (a, 51.6)  | 1365.2 (a, 0.6)   | 1265.5 (b, 0.5)    |
| 1365.8 (a, 0.1)   | 1366.2 (a, 1.0)   | 1266.2 (a, 0.3)    |
| 1367.1 (a, 1.5)   | 1366.5 (a, 0.7)   | 1271.7 (a, 0.7)    |
| 1368.3 (a, 2.6)   | 1366.7 (a, 0.3)   | 1272.0 (b, 2.8)    |
| 1368.5 (a, 1.4)   | 1367.2 (a, 0.3)   | 1307.8 (a, 6.4)    |
| 1368.7 (a, 1.9)   | 1367.2 (a, 0.2)   | 1309.9 (b, 1.6)    |
| 1369.0 (a, 1.1)   | 1369.0 (a, 0.1)   | 1314.3 (b, 2.7)    |
| 1369.6 (a, 2.7)   | 1370.2 (a, 0.3)   | 1314.8 (a, 0.2)    |
| 1370.2 (a, 0.6)   | 1411.6 (a, 3.0)   | 1332.6 (b, 0.9)    |
| 1410.8 (a, 1.6)   | 1412.4 (a, 2.1)   | 1335.3 (a, 0.0)    |
| 1412.7 (a, 1.1)   | 1413.6 (a, 2.4)   | 1336.5 (b, 6.5)    |
| 1413.3 (a, 0.5)   | 1415.1 (a, 1.1)   | 1337.6 (a, 1.0)    |
| 1413.6 (a, 2.2)   | 1416.1 (a, 0.9)   | 1369.0 (b, 0.2)    |
| 1418.3 (a, 2.2)   | 1416.6 (a, 2.6)   | 1371.4 (a, 1.2)    |
| 1420.1 (a, 1.9)   | 1419.1 (a, 1.8)   | 1401.8 (b, 0.8)    |
| 1421.7 (a, 2.4)   | 1419.7 (a, 1.6)   | 1401.8 (a, 0.3)    |
| 1421.8 (a, 1.6)   | 1637.7 (a, 373.2) | 1887.8 (b, 1860.7) |
| 1498.1 (a, 191.6) | 1655.6 (a, 333.6) | 1889.2 (a, 1888.4) |
| 1616.0 (a, 360.5) | 1685.3 (a, 667.1) | 1892.7 (b, 2001.5) |
| 1638.7 (a, 194.7) | 1699.0 (a, 135.6) | 1915.0 (a, 16.7)   |
| 3162.0 (a, 0.1)   | 3163.7 (a, 0.4)   | 3101.9 (b, 8.0)    |
| 3164.5 (a, 0.9)   | 3165.1 (a, 0.2)   | 3102.1 (a, 0.9)    |
| 3164.6 (a, 0.1)   | 3165.5 (a, 0.4)   | 3120.7 (a, 0.1)    |
| 3165.2 (a, 0.2)   | 3168.4 (a, 0.3)   | 3120.8 (b, 3.0)    |
| 3168.9 (a, 0.9)   | 3168.6 (a, 0.0)   | 3128.5 (a, 0.1)    |
| 3169.0 (a, 0.1)   | 3168.8 (a, 0.3)   | 3128.7 (b, 7.5)    |
| 3169.2 (a, 0.3)   | 3169.1 (a, 0.1)   | 3134.1 (b, 0.5)    |
| 3170.0 (a, 0.1)   | 3169.7 (a, 0.1)   | 3134.3 (a, 0.0)    |
| 3178.0 (a, 0.3)   | 3178.8 (a, 0.2)   | 3136.4 (b, 2.9)    |
| 3179.0 (a, 1.3)   | 3179.6 (a, 0.1)   | 3136.5 (a, 3.4)    |
| 3181.5 (a, 0.2)   | 3180.0 (a, 0.4)   | 3140.9 (b, 1.4)    |
| 3181.5 (a, 0.3)   | 3180.5 (a, 0.4)   | 3141.3 (a, 1.5)    |
| 3182.8 (a, 0.0)   | 3180.6 (a, 0.1)   | 3149.3 (b, 1.0)    |
| 3183.0 (a, 0.3)   | 3180.7 (a, 0.4)   | 3149.6 (a, 0.8)    |
| 3183.1 (a, 0.4)   | 3180.9 (a, 0.3)   | 3156.5 (b, 0.1)    |
| 3184.4 (a, 0.4)   | 3183.2 (a, 0.0)   | 3157.3 (a, 0.1)    |
| 3192.4 (a, 0.5)   | 3191.1 (a, 0.5)   | 3160.2 (b, 0.6)    |
| 3194.1 (a, 0.2)   | 3191.4 (a, 0.3)   | 3160.4 (a, 0.0)    |
| 3194.4 (a, 0.3)   | 3191.5 (a, 0.1)   | 3166.8 (a, 0.4)    |
| 3196.7 (a, 0.3)   | 3192.8 (a, 0.3)   | 3166.8 (b, 0.4)    |

**Table S36.** Theoretical harmonic vibrational frequencies (in  $\text{cm}^{-1}$ ) for the three singlet structures of  $\text{Cp}_3\text{V}_3(\text{CO})_9$  by the BP86 method (infrared intensities in parentheses are in  $\text{km/mol}$ ).

| 9S-1            | 9S-2            | 9S-3             |
|-----------------|-----------------|------------------|
| 46.5 (e, 0.1)   | 25.2 (a, 0.0)   | 25.3 (a'', 0.2)  |
| 46.5 (e, 0.1)   | 40.9 (a, 0.4)   | 33.2 (a'', 0.0)  |
| 50.9 (a, 0.0)   | 47.8 (a, 1.0)   | 43.1 (a', 0.5)   |
| 60.1 (e, 0.0)   | 57.6 (a, 0.2)   | 58.2 (a'', 0.0)  |
| 60.1 (e, 0.0)   | 70.1 (a, 0.1)   | 63.7 (a'', 0.3)  |
| 73.2 (e, 0.0)   | 71.3 (a, 0.3)   | 75.3 (a', 0.1)   |
| 73.2 (e, 0.0)   | 73.7 (a, 0.0)   | 80.5 (a', 0.3)   |
| 76.4 (a, 0.0)   | 77.9 (a, 0.0)   | 81.4 (a'', 0.2)  |
| 89.1 (e, 0.1)   | 82.1 (a, 0.0)   | 83.9 (a', 0.0)   |
| 89.1 (e, 0.1)   | 83.5 (a, 0.1)   | 93.6 (a'', 0.0)  |
| 89.6 (a, 1.2)   | 88.4 (a, 0.0)   | 97.4 (a', 0.1)   |
| 94.2 (e, 0.2)   | 92.8 (a, 0.7)   | 105.2 (a', 0.4)  |
| 94.2 (e, 0.2)   | 95.0 (a, 0.7)   | 106.9 (a'', 0.0) |
| 104.5 (a, 0.7)  | 102.2 (a, 0.0)  | 110.9 (a', 0.1)  |
| 112.8 (e, 1.0)  | 108.9 (a, 0.0)  | 117.3 (a'', 0.0) |
| 112.8 (e, 1.0)  | 117.0 (a, 0.1)  | 120.4 (a', 0.1)  |
| 114.4 (a, 0.2)  | 118.7 (a, 0.1)  | 122.6 (a'', 0.0) |
| 124.2 (a, 0.0)  | 125.4 (a, 2.2)  | 132.1 (a', 0.3)  |
| 125.0 (e, 0.9)  | 139.4 (a, 0.3)  | 137.8 (a', 0.5)  |
| 125.0 (e, 0.9)  | 142.9 (a, 0.3)  | 145.1 (a'', 0.0) |
| 134.2 (a, 0.1)  | 146.7 (a, 1.1)  | 153.8 (a', 1.3)  |
| 143.2 (e, 1.3)  | 149.1 (a, 0.0)  | 155.9 (a', 0.3)  |
| 143.2 (e, 1.3)  | 152.1 (a, 0.4)  | 158.6 (a'', 0.1) |
| 156.7 (e, 2.2)  | 163.1 (a, 0.2)  | 171.0 (a', 2.4)  |
| 156.7 (e, 2.2)  | 166.8 (a, 0.1)  | 174.8 (a'', 0.0) |
| 160.6 (a, 0.1)  | 169.9 (a, 0.1)  | 185.6 (a'', 0.1) |
| 176.1 (a, 0.1)  | 174.3 (a, 0.1)  | 197.9 (a', 0.2)  |
| 180.5 (a, 0.1)  | 191.8 (a, 0.1)  | 210.2 (a'', 0.1) |
| 191.9 (e, 0.8)  | 212.0 (a, 0.0)  | 211.4 (a', 0.2)  |
| 191.9 (e, 0.8)  | 232.1 (a, 0.3)  | 233.7 (a'', 0.8) |
| 311.9 (e, 20.5) | 285.9 (a, 2.4)  | 282.2 (a'', 0.8) |
| 311.9 (e, 20.5) | 294.7 (a, 4.9)  | 286.1 (a', 0.2)  |
| 318.1 (a, 1.5)  | 310.6 (a, 2.3)  | 293.9 (a', 5.4)  |
| 319.9 (a, 7.4)  | 311.8 (a, 9.3)  | 304.4 (a'', 5.4) |
| 320.0 (e, 3.1)  | 315.5 (a, 3.0)  | 307.4 (a'', 3.0) |
| 320.0 (e, 3.1)  | 316.6 (a, 1.3)  | 310.9 (a', 2.0)  |
| 327.9 (a, 3.8)  | 318.3 (a, 6.7)  | 320.8 (a', 11.2) |
| 329.8 (e, 14.8) | 325.3 (a, 18.6) | 323.4 (a', 4.7)  |
| 329.8 (e, 14.8) | 334.2 (a, 4.8)  | 329.8 (a', 3.3)  |
| 366.0 (a, 2.2)  | 342.0 (a, 0.2)  | 337.2 (a'', 1.6) |
| 366.8 (e, 1.9)  | 360.5 (a, 3.6)  | 357.2 (a'', 9.6) |
| 366.8 (e, 1.9)  | 365.6 (a, 2.0)  | 367.4 (a', 5.0)  |
| 409.1 (e, 4.9)  | 368.7 (a, 5.8)  | 381.6 (a'', 0.5) |
| 409.1 (e, 4.9)  | 397.5 (a, 0.1)  | 397.2 (a', 1.2)  |
| 421.8 (a, 0.2)  | 413.1 (a, 0.0)  | 397.3 (a'', 0.2) |
| 427.9 (a, 10.6) | 421.7 (a, 0.5)  | 419.3 (a', 6.3)  |
| 438.7 (e, 9.1)  | 428.7 (a, 7.6)  | 431.5 (a'', 7.8) |

|                  |                  |                    |
|------------------|------------------|--------------------|
| 438.7 (e, 9.1)   | 436.1 (a, 8.8)   | 435.8 (a', 9.7)    |
| 452.3 (e, 12.7)  | 436.6 (a, 8.4)   | 442.6 (a'', 1.4)   |
| 452.3 (e, 12.7)  | 438.3 (a, 0.7)   | 448.8 (a', 4.7)    |
| 452.8 (a, 1.1)   | 449.8 (a, 29.0)  | 453.1 (a'', 14.3)  |
| 476.9 (e, 24.2)  | 452.8 (a, 3.0)   | 462.9 (a', 5.5)    |
| 476.9 (e, 24.2)  | 465.1 (a, 23.7)  | 470.5 (a', 7.7)    |
| 477.1 (a, 0.1)   | 469.8 (a, 0.1)   | 483.5 (a', 67.7)   |
| 501.2 (e, 10.5)  | 477.0 (a, 25.4)  | 490.1 (a'', 76.7)  |
| 501.2 (e, 10.5)  | 493.6 (a, 9.3)   | 493.5 (a'', 87.9)  |
| 506.6 (a, 16.0)  | 498.6 (a, 171.8) | 503.1 (a', 0.7)    |
| 543.4 (a, 0.1)   | 526.2 (a, 81.5)  | 519.9 (a', 28.1)   |
| 546.2 (e, 169.1) | 533.3 (a, 143.9) | 531.3 (a'', 25.1)  |
| 546.2 (e, 169.1) | 551.6 (a, 33.4)  | 541.5 (a'', 246.2) |
| 559.9 (a, 0.7)   | 554.2 (a, 37.8)  | 552.8 (a', 82.5)   |
| 568.4 (e, 38.0)  | 566.5 (a, 40.4)  | 556.4 (a', 15.3)   |
| 568.4 (e, 38.0)  | 567.5 (a, 15.6)  | 561.2 (a'', 0.0)   |
| 569.7 (a, 41.3)  | 570.5 (a, 111.5) | 571.7 (a', 0.3)    |
| 576.1 (e, 6.0)   | 572.1 (a, 4.8)   | 571.7 (a'', 80.0)  |
| 576.1 (e, 6.0)   | 574.2 (a, 4.0)   | 576.6 (a', 62.0)   |
| 577.7 (a, 6.9)   | 575.7 (a, 1.1)   | 577.2 (a'', 7.1)   |
| 582.6 (e, 17.4)  | 577.4 (a, 18.5)  | 577.7 (a'', 1.1)   |
| 582.6 (e, 17.4)  | 578.9 (a, 2.1)   | 581.3 (a', 15.7)   |
| 586.7 (a, 2.7)   | 580.1 (a, 4.9)   | 582.4 (a'', 7.8)   |
| 587.8 (e, 10.2)  | 581.8 (a, 5.7)   | 583.9 (a', 13.9)   |
| 587.8 (e, 10.2)  | 593.9 (a, 73.3)  | 600.2 (a', 19.7)   |
| 812.6 (a, 1.6)   | 782.0 (a, 30.4)  | 791.3 (a'', 32.3)  |
| 812.9 (e, 9.1)   | 803.8 (a, 6.0)   | 806.3 (a', 77.9)   |
| 812.9 (e, 9.1)   | 807.9 (a, 28.7)  | 809.5 (a'', 1.9)   |
| 817.4 (e, 83.9)  | 811.7 (a, 6.6)   | 812.8 (a'', 0.7)   |
| 817.4 (e, 83.9)  | 812.3 (a, 1.5)   | 813.0 (a', 12.0)   |
| 818.0 (a, 7.2)   | 812.9 (a, 26.6)  | 815.8 (a', 11.7)   |
| 818.7 (e, 26.4)  | 813.4 (a, 49.1)  | 816.2 (a'', 4.5)   |
| 818.7 (e, 26.4)  | 814.0 (a, 1.6)   | 816.8 (a', 50.6)   |
| 819.4 (a, 6.7)   | 814.8 (a, 83.0)  | 818.3 (a', 8.3)    |
| 825.7 (e, 31.3)  | 817.8 (a, 38.7)  | 818.6 (a'', 0.2)   |
| 825.7 (e, 31.3)  | 818.3 (a, 2.9)   | 821.1 (a', 76.8)   |
| 827.1 (a, 5.1)   | 821.0 (a, 15.4)  | 822.6 (a'', 49.0)  |
| 833.4 (e, 2.2)   | 821.6 (a, 30.8)  | 828.4 (a', 10.8)   |
| 833.4 (e, 2.2)   | 828.9 (a, 11.2)  | 830.4 (a', 25.1)   |
| 833.6 (a, 22.5)  | 838.5 (a, 6.6)   | 832.8 (a'', 12.1)  |
| 883.7 (a, 2.3)   | 872.1 (a, 0.3)   | 877.6 (a'', 0.0)   |
| 883.8 (e, 0.1)   | 877.2 (a, 1.6)   | 882.7 (a'', 0.0)   |
| 883.8 (e, 0.1)   | 881.8 (a, 0.6)   | 885.8 (a', 2.9)    |
| 902.6 (a, 0.3)   | 887.1 (a, 0.9)   | 889.3 (a', 7.3)    |
| 902.9 (e, 0.5)   | 893.4 (a, 0.3)   | 891.4 (a'', 1.0)   |
| 902.9 (e, 0.5)   | 903.0 (a, 1.6)   | 900.8 (a', 0.5)    |
| 995.0 (e, 0.9)   | 988.4 (a, 7.6)   | 989.4 (a'', 7.9)   |
| 995.0 (e, 0.9)   | 993.7 (a, 3.6)   | 994.0 (a', 2.5)    |
| 995.4 (a, 10.7)  | 993.9 (a, 2.7)   | 994.4 (a'', 2.6)   |
| 998.2 (e, 5.0)   | 997.9 (a, 1.1)   | 995.1 (a', 2.8)    |
| 998.2 (e, 5.0)   | 999.1 (a, 3.7)   | 998.0 (a'', 0.0)   |
| 998.6 (a, 0.6)   | 1007.0 (a, 13.6) | 1009.3 (a', 14.6)  |
| 1044.5 (e, 0.5)  | 1038.4 (a, 0.6)  | 1036.6 (a'', 0.0)  |

|                   |                    |                      |
|-------------------|--------------------|----------------------|
| 1044.5 (e, 0.6)   | 1045.9 (a, 0.1)    | 1041.8 (a', 1.5)     |
| 1044.6 (a, 0.8)   | 1046.9 (a, 0.3)    | 1047.4 (a'', 0.3)    |
| 1047.7 (a, 0.0)   | 1047.8 (a, 0.4)    | 1047.8 (a'', 0.1)    |
| 1047.8 (e, 0.8)   | 1048.3 (a, 0.6)    | 1049.4 (a', 0.3)     |
| 1047.8 (e, 0.8)   | 1055.9 (a, 5.3)    | 1057.2 (a', 3.8)     |
| 1114.1 (e, 0.0)   | 1111.8 (a, 0.1)    | 1111.6 (a', 0.1)     |
| 1114.1 (e, 0.0)   | 1113.3 (a, 0.3)    | 1115.0 (a'', 0.0)    |
| 1114.1 (a, 0.0)   | 1116.6 (a, 1.2)    | 1117.6 (a', 1.4)     |
| 1225.1 (a, 0.0)   | 1222.7 (a, 0.0)    | 1222.0 (a'', 0.0)    |
| 1225.2 (e, 0.0)   | 1227.2 (a, 0.0)    | 1222.5 (a'', 0.0)    |
| 1225.2 (e, 0.0)   | 1229.1 (a, 0.0)    | 1229.9 (a', 0.0)     |
| 1373.2 (e, 0.5)   | 1366.9 (a, 0.7)    | 1365.3 (a'', 2.6)    |
| 1373.2 (e, 0.5)   | 1371.0 (a, 0.9)    | 1369.4 (a', 1.8)     |
| 1373.4 (a, 0.0)   | 1372.0 (a, 3.0)    | 1371.2 (a'', 0.0)    |
| 1375.5 (e, 0.3)   | 1372.9 (a, 1.4)    | 1373.2 (a', 1.4)     |
| 1375.5 (e, 0.3)   | 1378.9 (a, 0.2)    | 1379.5 (a'', 0.0)    |
| 1375.6 (a, 6.9)   | 1382.4 (a, 0.2)    | 1382.8 (a', 0.4)     |
| 1413.5 (e, 0.4)   | 1409.2 (a, 3.2)    | 1409.7 (a', 3.8)     |
| 1413.5 (e, 0.4)   | 1410.2 (a, 1.7)    | 1410.7 (a'', 1.0)    |
| 1413.6 (a, 5.0)   | 1414.8 (a, 1.4)    | 1411.8 (a'', 5.4)    |
| 1416.7 (a, 0.1)   | 1416.4 (a, 4.8)    | 1415.4 (a', 0.6)     |
| 1416.7 (e, 6.0)   | 1416.9 (a, 0.6)    | 1417.4 (a'', 0.1)    |
| 1416.7 (e, 6.0)   | 1421.9 (a, 3.0)    | 1422.2 (a', 3.2)     |
| 1833.3 (e, 36.6)  | 1754.9 (a, 326.6)  | 1714.3 (a', 337.7)   |
| 1833.3 (e, 36.6)  | 1783.5 (a, 146.3)  | 1793.9 (a', 246.9)   |
| 1873.0 (a, 995.6) | 1864.6 (a, 307.6)  | 1858.4 (a'', 405.6)  |
| 1894.7 (e, 646.2) | 1891.6 (a, 559.9)  | 1861.2 (a', 352.5)   |
| 1894.7 (e, 646.3) | 1902.6 (a, 28.5)   | 1871.3 (a', 109.4)   |
| 1906.0 (a, 304.0) | 1911.8 (a, 168.0)  | 1919.4 (a'', 27.3)   |
| 1922.3 (e, 450.6) | 1932.9 (a, 637.3)  | 1938.5 (a'', 1436.9) |
| 1922.3 (e, 450.5) | 1950.9 (a, 1487.2) | 1940.4 (a', 457.1)   |
| 1983.7 (a, 876.5) | 1989.0 (a, 650.6)  | 1983.2 (a', 1391.9)  |
| 3171.2 (a, 0.4)   | 3173.3 (a, 0.1)    | 3175.0 (a'', 0.1)    |
| 3171.2 (e, 0.1)   | 3173.7 (a, 0.0)    | 3175.3 (a', 0.2)     |
| 3171.2 (e, 0.1)   | 3177.8 (a, 0.4)    | 3178.0 (a', 0.1)     |
| 3178.7 (a, 0.0)   | 3178.5 (a, 0.0)    | 3180.5 (a'', 0.0)    |
| 3178.7 (e, 0.1)   | 3179.8 (a, 0.2)    | 3181.0 (a', 0.4)     |
| 3178.7 (e, 0.1)   | 3183.7 (a, 0.8)    | 3188.5 (a'', 1.7)    |
| 3187.3 (e, 0.1)   | 3187.4 (a, 0.2)    | 3189.4 (a'', 0.0)    |
| 3187.3 (e, 0.1)   | 3188.1 (a, 1.3)    | 3190.0 (a', 0.1)     |
| 3187.3 (a, 1.5)   | 3189.2 (a, 0.1)    | 3192.4 (a'', 0.1)    |
| 3189.4 (a, 0.4)   | 3190.0 (a, 0.1)    | 3193.2 (a', 0.1)     |
| 3189.4 (e, 0.8)   | 3192.4 (a, 0.2)    | 3194.4 (a', 0.5)     |
| 3189.4 (e, 0.8)   | 3196.0 (a, 0.1)    | 3206.1 (a'', 0.4)    |
| 3203.4 (e, 0.0)   | 3201.3 (a, 1.5)    | 3206.5 (a'', 0.2)    |
| 3203.4 (e, 0.0)   | 3204.6 (a, 0.1)    | 3206.9 (a', 2.3)     |
| 3203.4 (a, 0.1)   | 3208.1 (a, 0.9)    | 3216.8 (a', 0.6)     |

### **Complete Gaussian 09 reference (Reference 19)**

Gaussian 09, Revision B.01,

M. J. Frisch, G. W. Trucks, H. B. Schlegel, G. E. Scuseria, M. A. Robb, J. R. Cheeseman, G. Scalmani, V. Barone, B. Mennucci, G. A. Petersson, H. Nakatsuji, M. Caricato, X. Li, H. P. Hratchian, A. F. Izmaylov, J. Bloino, G. Zheng, J. L. Sonnenberg, M. Hada, M. Ehara, K. Toyota, R. Fukuda, J. Hasegawa, M. Ishida, T. Nakajima, Y. Honda, O. Kitao, H. Nakai, T. Vreven, J. A. Montgomery, Jr., J. E. Peralta, F. Ogliaro, M. Bearpark, J. J. Heyd, E. Brothers, K. N. Kudin, V. N. Staroverov, T. Keith, R. Kobayashi, J. Normand, K. Raghavachari, A. Rendell, J. C. Burant, S. S. Iyengar, J. Tomasi, M. Cossi, N. Rega, J. M. Millam, M. Klene, J. E. Knox, J. B. Cross, V. Bakken, C. Adamo, J. Jaramillo, R. Gomperts, R. E. Stratmann, O. Yazyev, A. J. Austin, R. Cammi, C. Pomelli, J. W. Ochterski, R. L. Martin, K. Morokuma, V. G. Zakrzewski, G. A. Voth, P. Salvador, J. J. Dannenberg, S. Dapprich, A. D. Daniels, O. Farkas, J. B. Foresman, J. V. Ortiz, J. Cioslowski and D. J. Fox, Gaussian, Inc., Wallingford CT, 2010.
